# Supplementary material for: Synthesis of a carborane-substituted bis(phosphanido) cobaltate(i), ligand substitution, and unusual P4 fragmentation
Source: PubMed Central journal article supplement — Chem Sci. 2021 Jul 7;12(33):11225–35. doi: 10.1039/d1sc02948g (PMC8386647; doi:10.1039/d1sc02948g), 2021-07-07
Supplement: SC-012-D1SC02948G-s001.pdf [file SC-012-D1SC02948G-s001.pdf]

## Electronic Supplementary Information

### Synthesis of a Carborane-substituted Bis(phosphanido) Cobaltate(I), Ligand Substitution, and Unusual P<sub>4</sub> Fragmentation

Peter Coburger,<sup>a,b,c</sup> Julia Leitl,<sup>a</sup> Daniel J. Scott,<sup>a</sup> Gabriele Hierlmeier,<sup>a</sup> Ilya G. Shenderovich,<sup>d</sup> Evamarie Hey-Hawkins,<sup>\*b</sup> and Robert Wolf<sup>\*a</sup>

Oxidative addition of the P–P single bond of an *ortho*-carborane-derived 1,2-diphosphetane (1,2-C<sub>2</sub>(PMes)<sub>2</sub>B<sub>10</sub>H<sub>10</sub>) (Mes = 2,4,6-Me<sub>3</sub>C<sub>6</sub>H<sub>2</sub>) to cobalt(-I) and nickel(0) sources affords the first heteroleptic complexes of a carborane-bridged bis(phosphanido) ligand. The complexes also incorporate labile ligands suitable for further functionalisation. Thus, the cobalt complex [K{[18]crown-6}][Co{1,2-(PMes)<sub>2</sub>C<sub>2</sub>B<sub>10</sub>H<sub>10</sub>}(cod)] (cod = 1,5-cyclooctadiene) bearing a labile cyclooctadiene ligand undergoes facile ligand exchange reactions with isonitriles and *tert*-butyl phosphalkyne with retention of the bis(phosphanido) ligand. However, in the reaction with one equivalent of P<sub>4</sub>, the electron-rich bis(phosphanido) moiety abstracts a single phosphorus atom with formation of a new P<sub>3</sub> chain, while the remaining three P atoms derived from P<sub>4</sub> form an η<sup>3</sup>-coordinating *cyclo*-P<sub>3</sub> ligand. In contrast, when the same reaction is performed with two equivalents of the cobalt(I) complex, a dinuclear product is formed which features an unusual P<sub>4</sub> chain in its molecular structure.

a. Dr. P. Coburger, Dr. J. Leitl, Dr. D. J. Scott, M.Sc. G. Hierlmeier, Prof. Dr. R. Wolf  
Institute of Inorganic Chemistry, Universität Regensburg,  
93040 Regensburg (Germany)  
E-mail: [Robert.Wolf@chemie.uni-regensburg.de](mailto:Robert.Wolf@chemie.uni-regensburg.de)

b. Dr. P. Coburger, Prof. Dr. E. Hey-Hawkins  
Institute of Inorganic Chemistry, Universität Leipzig  
Johannisallee 29, 04103 Leipzig (Germany)  
E-mail: [hey@uni-leipzig.de](mailto:hey@uni-leipzig.de); Website; <https://anorganik.chemie.uni-leipzig.de/anorganik/ak-hey-hawkins/>

c. present address: Dr. P. Coburger,  
Laboratory of Inorganic Chemistry, ETH Zürich  
Vladimir-Prelog-Weg 1-5/10, CH-8093 Zürich (Switzerland)

d. Dr. I. G. Shenderovich  
Institute of Organic Chemistry, Universität Regensburg,  
93040 Regensburg (Germany)

## Table of Contents

|                                                                                                                                            |     |
|--------------------------------------------------------------------------------------------------------------------------------------------|-----|
| 1. Experimental Section .....                                                                                                              | S3  |
| 2. Computational Details .....                                                                                                             | S7  |
| 3. Crystal structure tables .....                                                                                                          | S8  |
| 4. NMR spectra .....                                                                                                                       | S14 |
| 5. NMR spectroscopic monitoring of the reaction between [K(18-c-6)(thf)][ <i>rac</i> -1] and P <sub>4</sub><br>S28                         |     |
| 6. NMR spectroscopic monitoring of the reaction between [K(18-c-6)][ <i>rac</i> -1] and [K(18-c-<br>6)][ <i>meso</i> -8]<br>.....<br>..... | S28 |
| 7. Variable temperature NMR spectroscopic measurements on [K(18-c-6)][ <i>rac</i> -7].....                                                 | S29 |
| 8. Variable temperature NMR spectroscopic measurements on [K(18-c-6) <sub>2</sub> ][ <i>rac</i> -9] .....                                  | S30 |
| 9. Cyclic voltammetry measurements.....                                                                                                    | S31 |
| 10. UV-vis spectra and TDDFT results .....                                                                                                 | S35 |
| 11. Relevant Natural Orbitals obtained from CASSCF calculations.....                                                                       | S49 |
| 12. Broken-symmetry DFT calculations on [ <i>rac</i> -9] <sup>2-</sup> .....                                                               | S57 |
| 13. Cartesian coordinates of optimised structures .....                                                                                    | S59 |
| References.....                                                                                                                            | S78 |

## 1. Experimental Section

**General Methods.** All reactions and manipulations were carried out under an argon atmosphere using standard Schlenk and glovebox techniques unless stated otherwise. Solvents were either obtained from an MBraun Solvent Purification System, or dried and stored according to common procedures.<sup>1</sup> *Tert*-butyl phosphalkyne,<sup>2</sup>  $[\text{K}(\text{thf})_{0.2}][\text{Co}(\eta^4\text{-cod})_2]$ ,<sup>3</sup>  $\text{KC}_8$ <sup>4</sup> and  $[\text{Ni}(\text{IMes})(\eta^2\text{-H}_2\text{C}=\text{CHSiMe}_3)_2]$ <sup>5</sup> were synthesised according to literature procedures. The synthesis of dibromo(mesityl)phosphane was adapted from a protocol for the synthesis of dichloro(mesityl)phosphane by using  $\text{PBr}_3$  instead of  $\text{PCl}_3$  as the phosphorus source.<sup>6</sup> All other compounds are commercially available. NMR spectra were recorded with a Bruker AVANCE DRX 400 MHz NMR spectrometer at room temperature unless stated otherwise. All isolated compounds were measured in deuterated tetrahydrofuran except for *rac*-**5**, which was measured in  $\text{C}_6\text{D}_6$ . Tetramethylsilane was used as internal standard for  $^1\text{H}$  and  $^{13}\text{C}\{^1\text{H}\}$  NMR spectra. 85%  $\text{H}_3\text{PO}_4$  was used as external standard for  $^{31}\text{P}\{^1\text{H}\}$  NMR spectra and  $\text{BF}_3\cdot\text{OEt}_2$  was used as external standard for  $^{11}\text{B}\{^1\text{H}\}$  NMR spectra. NMR spectra were recorded at the following frequencies:  $^1\text{H}$ : 400.13 MHz,  $^{13}\text{C}$ : 100.63 MHz,  $^{11}\text{B}$ : 128.38 MHz,  $^{31}\text{P}$ : 161.99 MHz. The solid-state  $^{31}\text{P}$  NMR spectroscopic measurements were performed on an Infinity<sub>plus</sub> spectrometer system (Agilent) operated at 7 Tesla, equipped with a variable-temperature Chemagnetics-Varian 6 mm pencil CPMAS probe.  $^{31}\text{P}\{^1\text{H}\}$  CP NMR spectra were recorded with a cross polarisation time of 4 ms, a  $90^\circ$ -pulse length of 4.0  $\mu\text{s}$ , and a repetition time of 20 s. Magic angle spinning (MAS) rates of 5750 Hz and 5010 Hz were used. The spectrum was indirectly referenced to  $\text{H}_3\text{PO}_4$  (85% in  $\text{H}_2\text{O}$ ). The numerical NMR parameters have been extracted from the experimentally obtained spectrum using the WSolids1 program package.<sup>7</sup> UV-vis spectra were recorded on a Varian Cary 50 spectrometer. Elemental analyses were determined by the analytical department of Regensburg University.

**Single crystal X-ray diffraction.** The single-crystal X-ray diffraction data were recorded on Agilent Technologies SuperNova and GV1000, TitanS2 diffractometers with  $\text{Cu-K}_\alpha$  radiation ( $\lambda = 1.54184 \text{ \AA}$ ) except for  $[\text{K}(\text{18-c-6})(\text{dme})_2]$ **8**, where  $\text{Cu-K}_\beta$  radiation ( $\lambda = 1.39225 \text{ \AA}$ ) was used. Semiempirical multi-scan absorption corrections were applied to the data. The structures were solved with SHELXS<sup>8</sup> and least-square refinements on  $F^2$  were carried out with SHELXL.<sup>8</sup> The hydrogen atoms were located in idealised positions and refined isotropically with a riding model. Crystallographic data for has been deposited at the CCDC under 2086046 ( $[\text{K}(\text{dme})_4][\text{rac-1}]$ ), 2086047 (*rac*-**2**), 2086048 ( $[\text{K}(\text{18-c-6})(\text{dme})][\text{rac-6}]$ ), 2086049 ( $[\text{K}(\text{dme})_4][\text{rac-7}]$ ), 2086050  $[\text{K}(\text{18-c-6})(\text{dme})_2][\text{meso-8}]$  and 2086051 ( $[\text{K}(\text{dme})][\text{K}(\text{dme})_2][\text{rac-9}]$ ) and can be obtained from <https://www.ccdc.cam.ac.uk/structures/>. These data are provided free of charge by The Cambridge Crystallographic Data Centre.

**Synthesis of *rac*-1,2-(PMes)<sub>2</sub>C<sub>2</sub>B<sub>10</sub>H<sub>10</sub> (*rac*-5).** At 0°C, *n*BuLi (14 mL of a 1.56 M solution in hexanes, 21.8

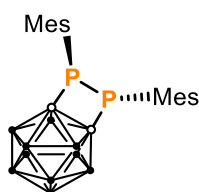

*rac*-**5**

mmol, 2.02 equiv.) was added slowly to a solution of *ortho*-carborane **3** (1.56 g, 10.8 mmol, 1.00 equiv.) in diethyl ether (30 mL). The mixture was stirred at 0°C for 0.5 h and then for 2 h at room temperature. The resulting suspension was added to a solution of MesPBr<sub>2</sub> (6.62 g, 21.6 mmol, 2.00 equiv.) in diethyl ether (40 mL) over a period of 2 h. The mixture was then stirred for a further 17 h. Afterwards, the solvent was replaced with toluene and LiBr was removed *via* filtration over celite.

Volatiles were removed from the filtrate to afford a red oil. After washing of the oil with acetonitrile (3 x 5 mL), crude bis(phosphane) **4** (3 g of a mixture of the *rac* and *meso* isomer) was obtained as a



L·mol<sup>-1</sup>·cm<sup>-1</sup>), 340 nm ( $\epsilon = 9720$  L·mol<sup>-1</sup>·cm<sup>-1</sup>), 424 nm ( $\epsilon = 1670$  L·mol<sup>-1</sup>·cm<sup>-1</sup>), 527 nm ( $\epsilon = 1860$  L·mol<sup>-1</sup>·cm<sup>-1</sup>), 898 nm ( $\epsilon = 680$  L·mol<sup>-1</sup>·cm<sup>-1</sup>).

### Synthesis of [K(18-c-6)(dme)][Co(C<sub>6</sub>H<sub>11</sub>NC)<sub>2</sub>{B<sub>10</sub>H<sub>10</sub>C<sub>2</sub>(PMes)<sub>2</sub>}] ([K(18-c-6)(dme)][rac-6])

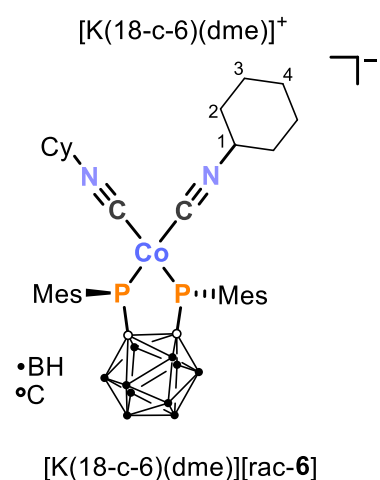

Cyclohexyl isocyanide (25  $\mu$ L, 0.20 mmol, 2.00 eq) was added to a solution of [K(18-c-6)(thf)][rac-1] (100 mg, 0.10 mmol, 1.00 eq) in THF (5 mL). After 15 h of stirring, the mixture was filtered and volatiles were removed *in vacuo*. The residue was dissolved in DME and the resulting solution was layered with *n*-hexane. After 3 d, [K(18-c-6)(dme)][rac-6] was obtained as red crystals suitable for single-crystal X-ray diffraction studies. Drying of the crystals *in vacuo* resulted in partial removal of dme molecules, affording [K(18-c-6)(dme)<sub>0.8</sub>][rac-6] (60 mg, 55%) according to <sup>1</sup>H NMR spectroscopy and elemental analysis. C<sub>46</sub>H<sub>78</sub>B<sub>10</sub>CoKN<sub>2</sub>O<sub>6</sub>P<sub>2</sub>·(C<sub>4</sub>H<sub>10</sub>O<sub>2</sub>)<sub>0.8</sub>, calculated (%): C 53.99, H 7.71, N 2.72; found (%): C 54.32, H 7.72, N 2.40. <sup>1</sup>H NMR:  $\delta = 0.96 - 1.14$  (m, 10H, H<sup>2,3,4</sup>), 1.20 – 1.30 (m, 2H, H<sup>4</sup>), 1.31 – 1.40 (m, 4H, H<sup>2</sup>), 1.42 – 1.52 (m, 4H, H<sup>3</sup>), 2.17 (s, 6H, *para*-CH<sub>3</sub>), 2.87 (s, 12H, *ortho*-CH<sub>3</sub>), 2.92 – 2.98 (m, 2H, 1), 3.27 (s, 4.8H, dme-CH<sub>3</sub>), 3.43 (s, 3.6H, dme-CH<sub>2</sub>). 3.64 (s, 24H, 18-c-6), 6.77 (s, 4H, mesityl-CH) ppm. <sup>13</sup>C{<sup>1</sup>H} NMR:  $\delta = 21.1$  (s, *para*-CH<sub>3</sub>), 24.1 (s, C<sup>3</sup>), 26.3 (s, C<sup>4</sup>), 27.9 (s, *ortho*-CH<sub>3</sub>), 34.0 (s, C<sup>2</sup>), 53.7 (s, C<sup>1</sup>), 58.8 (s, dme-CH<sub>3</sub>), 71.1 (s, 18-c-6), 72.7 (s, dme-CH<sub>2</sub>), 97.1 – 98.8 (m, C<sub>2</sub>B<sub>10</sub>H<sub>10</sub>), 128.2 (s, mesityl-CH), 135.5 (s, *para*-C), 142.8 – 143.8 (m, *ipso*-C), 145.3 (m, *ortho*-C) ppm. <sup>11</sup>B{<sup>1</sup>H} NMR:  $\delta = -9.0$  (bs), -6.7 (bs) ppm. <sup>31</sup>P{<sup>1</sup>H} NMR:  $\delta = 103.3$  (bs) ppm. UV-vis:  $\lambda_{\max} = 277$  nm ( $\epsilon = 11640$  L·mol<sup>-1</sup>·cm<sup>-1</sup>), 342 nm ( $\epsilon = 8580$  L·mol<sup>-1</sup>·cm<sup>-1</sup>), 490 nm ( $\epsilon = 3430$  L·mol<sup>-1</sup>·cm<sup>-1</sup>), 655 nm ( $\epsilon = 740$  L·mol<sup>-1</sup>·cm<sup>-1</sup>).

### Synthesis of [K(18-c-6)][Co(*t*Bu-C<sub>2</sub>P<sub>2</sub>){B<sub>10</sub>H<sub>10</sub>C<sub>2</sub>(PMes)<sub>2</sub>}] ([K(18-c-6)][rac-7])

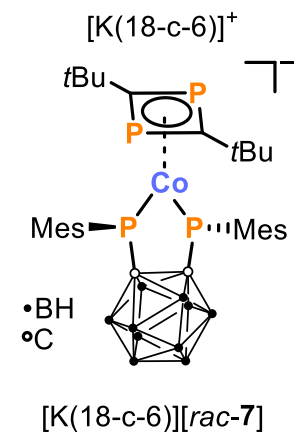

*tert*-butyl phosphoalkyne in *n*-hexane (0.30 mL, 2.6 M, 6.00 equiv.) was added to a solution of [K(18-c-6)(thf)][rac-1] (130 mg, 0.13 mmol, 1.00 equiv.) in THF (5 mL). After stirring for 15 h, volatiles were removed *in vacuo*. The residue was washed with a mixture of diethyl ether and *n*-hexane (1:4 v/v, 3 x 3 mL) to afford [K(18-c-6)][rac-7] (87 mg, 65%) as a red solid. Crystals of [K(dme)<sub>4</sub>][rac-7] suitable for single crystal X-ray diffraction were obtained by adding the *tert*-butyl phosphoalkyne solution to a solution of [K(dme)<sub>4</sub>][rac-1] in DME and layering the mixture with *n*-hexane after 15 h of stirring. C<sub>42</sub>H<sub>74</sub>B<sub>10</sub>CoK<sub>2</sub>O<sub>6</sub>P<sub>4</sub>, calculated (%): C 50.19, H 7.42; found (%): C 50.28, H 6.99. <sup>1</sup>H NMR:  $\delta = 0.84$  (s, 18H, *t*Bu-CH<sub>3</sub>), 2.25 (s, 6H, *para*-CH<sub>3</sub>), 2.84 (s, 12H, *ortho*-CH<sub>3</sub>), 3.59 (s, 24H, 18-c-6), 6.86 (s, 4H, mesityl-CH) ppm. <sup>13</sup>C{<sup>1</sup>H} NMR:  $\delta = 21.3$  (s, *para*-CH<sub>3</sub>), 27.3 (s, *ortho*-CH<sub>3</sub>), 30.8 (s, *t*Bu-CH<sub>3</sub>), 35.3 (s, *t*Bu-C(CH<sub>3</sub>)), 71.1 (s, 18-c-6), 93.7 – 94.5 (m, C<sub>2</sub>B<sub>10</sub>H<sub>10</sub>), 99.1 – 100.5 (m, *t*Bu<sub>2</sub>C<sub>2</sub>P<sub>2</sub>), 128.7 (s, mesityl-CH), 137.1 (s, *para*-C), 141.9 – 142.1 (m, *ipso*-C), 145.1 (s, *ortho*-C) ppm. <sup>11</sup>B{<sup>1</sup>H} NMR:  $\delta = -9.7$  to -7.7 (m) ppm. <sup>31</sup>P{<sup>1</sup>H} NMR:  $\delta = 15.3$  (t, <sup>2</sup>J<sub>PP</sub> = 14 Hz, *t*Bu<sub>2</sub>C<sub>2</sub>P<sub>2</sub>), 104.1 (bs) ppm. UV-vis:  $\lambda_{\max} = 354$  nm ( $\epsilon = 11450$  L·mol<sup>-1</sup>·cm<sup>-1</sup>), 404 nm ( $\epsilon = 6250$  L·mol<sup>-1</sup>·cm<sup>-1</sup>), 513 nm ( $\epsilon = 4290$  L·mol<sup>-1</sup>·cm<sup>-1</sup>), 810 nm ( $\epsilon = 2290$  L·mol<sup>-1</sup>·cm<sup>-1</sup>).

**Synthesis of [K(18-c-6)][Co(*cyclo*-P<sub>3</sub>){B<sub>10</sub>H<sub>10</sub>C<sub>2</sub>(P<sub>3</sub>Mes<sub>2</sub>)}] ([K(18-c-6)][*meso*-8]).** A solution of white phosphorus in benzene (0.44 mL, 0.19 M, 1.00 equiv.) was added to a solution of [K(18-c-6)(thf)][*rac*-1] (87 mg, 0.088 mmol, 1.05 equiv.) in THF (5 mL). After stirring for 25 h, volatiles were removed *in vacuo*. The residue was dissolved in THF/toluene (4 mL/1 mL) and the resulting solution was layered with *n*-hexane (3 mL). After 3 d, [K(18-c-6)][*meso*-8] (45 mg, 49%) was obtained as yellow crystals. The final product contained ca. 8% of [K(18-c-6)]<sub>2</sub>[*rac*-9] as indicated by <sup>1</sup>H NMR spectroscopy and elemental analysis.

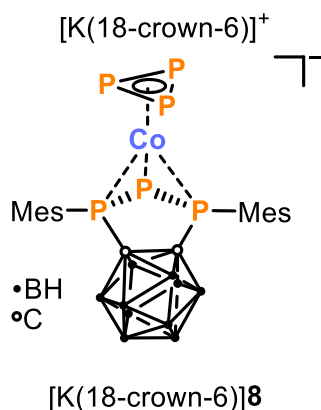

Crystals of [K(18-c-6)(dme)<sub>2</sub>][*meso*-8] suitable for single crystal X-ray diffraction were obtained by dissolving [K(18-c-6)][*meso*-8] in a 2:1 mixture of DME/toluene and layering the resulting solution with *n*-hexane. C<sub>32</sub>H<sub>56</sub>B<sub>10</sub>CoK<sub>2</sub>O<sub>6</sub>P<sub>6</sub>, calculated (%): C 41.38, H 6.08; found (%): C 42.0, H 5.95. <sup>1</sup>H NMR: δ = 2.24 (s, 6H, *para*-CH<sub>3</sub>), 2.80 (s, 6H, *ortho*-CH<sub>3</sub>), 2.82 (s, 6H, *ortho*-CH<sub>3</sub>), 3.59 (s, 24H, 18-c-6), 6.83 (s, 2H, mesityl-CH), 6.87 (d, 2H, <sup>4</sup>J<sub>PP</sub> = 5 Hz, mesityl-CH) ppm. <sup>13</sup>C{<sup>1</sup>H} NMR: δ = 20.3 (s, *para*-CH<sub>3</sub>), 25.4 (s, *ortho*-CH<sub>3</sub>), 70.0 (s, 18-c-6), 73.2 – 74.2 (m, C<sub>2</sub>B<sub>10</sub>H<sub>10</sub>), 124.6 – 124.9 (m, *ipso*-C), 128.3 (s, mesityl-CH), 129.2 (d, <sup>3</sup>J<sub>CP</sub> = 10 Hz, mesityl-CH), 140.0 (s, *para*-C), 142.3 (s, *ortho*-C), 146.2 (d, <sup>2</sup>J<sub>PP</sub> = 27 Hz, *ortho*-C) ppm. <sup>11</sup>B{<sup>1</sup>H} NMR: δ = -12.5 (bs, 4B), -8.6 (bs, 2B), -2.3 (bs, 4B) ppm. <sup>31</sup>P{<sup>1</sup>H} NMR: δ = -250.9 (s, *cyclo*-P<sub>3</sub>), -250.8 (t, <sup>1</sup>J<sub>PP</sub> = 330 Hz, C<sub>2</sub>(PMes)<sub>2</sub>P), 30.0 (d, <sup>1</sup>J<sub>PP</sub> = 330 Hz, C<sub>2</sub>(PMes)<sub>2</sub>P) ppm. UV-vis: λ<sub>max</sub> = 287 nm (ε = 16280 L·mol<sup>-1</sup>·cm<sup>-1</sup>), 337 nm (ε = 18340 L·mol<sup>-1</sup>·cm<sup>-1</sup>), 398 nm (ε = 6760 L·mol<sup>-1</sup>·cm<sup>-1</sup>).

**Synthesis of [K(18-c-6)]<sub>2</sub>[(B<sub>10</sub>H<sub>10</sub>C<sub>2</sub>(P<sub>2</sub>Mes<sub>2</sub>)Co)<sub>2</sub>(μ-η<sup>4</sup>:η<sup>4</sup>-P<sub>4</sub>)] ([K(18-c-6)]<sub>2</sub>[*rac*-9]).** A solution of white phosphorus in benzene (0.8 mL, 0.19 M, 0.56 equiv.) was added to a solution of K[*rac*-1] in THF (3 mL, 0.09 M, 1.00 equiv.). After stirring for 12 d, 18-c-6 (75 mg, 0.27 mmol, 1.00 equiv.) was added to the reaction mixture. After stirring for additional 15 h, 7 mL of *n*-hexane were added to precipitate the product. After stirring for another 15 h, the mixture was filtered and the residue was washed with diethyl ether (8x3 mL) to afford [K(18-c-6)]<sub>2</sub>[*rac*-9] (50 mg, 21%) as a purple solid. Crystals of [K(dme)<sub>3</sub>]<sub>2</sub>[*rac*-9] suitable for single crystal X-ray diffraction were obtained by stirring the reaction mixture for 12 d, removal of the solvent *in vacuo* and subsequent recrystallization of the resulting residue from DME/*n*-hexane.

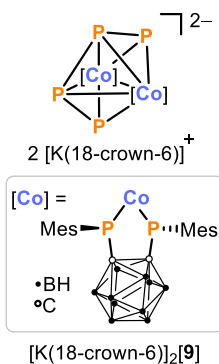

C<sub>64</sub>H<sub>112</sub>B<sub>20</sub>Co<sub>2</sub>K<sub>2</sub>O<sub>12</sub>P<sub>8</sub>, calculated (%): C 44.34, H 6.51; found (%): C 44.30, H 6.38. <sup>1</sup>H NMR: δ = 2.14 (s, 6H, *para*-CH<sub>3</sub>), 2.50 – 2.60 (m, 12H, *ortho*-CH<sub>3</sub>), 3.62 (s, 24H, 18-c-6), 6.63 (s, 4H, mesityl-CH) ppm. <sup>13</sup>C{<sup>1</sup>H} NMR: δ = 21.2 (s, *para*-CH<sub>3</sub>), 26.3 (s, *ortho*-CH<sub>3</sub>), 71.2 (s, 18-c-6), 128.6 (s, mesityl-CH), 136.1 (bs, *para*-C), 145.6 (bs, *ortho*-C) ppm. <sup>11</sup>B{<sup>1</sup>H} NMR: δ = -7.1 (bs) ppm. <sup>31</sup>P{<sup>1</sup>H} NMR (298 K): δ = -42.0 (bs, P4, P5), 58.0 (bs, PMes), 119.2 (bs, PMes), 223.1 (bs, P6), 423.6 (bs, P3) ppm (labels according to Figure 4). <sup>31</sup>P{<sup>1</sup>H} NMR (233 K): δ = -49.1 (dd, <sup>1</sup>J<sub>PP</sub> = 379 Hz, 217 Hz, P4), -42.3 (dd, <sup>1</sup>J<sub>PP</sub> = 478 Hz, 217 Hz, P5), 55.0 – 56.2 (m, PMes), 117.8 (bs, PMes), 216.5 (d, <sup>1</sup>J<sub>PP</sub> = 478 Hz, P6), 418.8 (d, <sup>1</sup>J<sub>PP</sub> = 379 Hz, P3) ppm (labels according to Figure 4). UV-vis: λ<sub>max</sub> = 357 nm (ε = 20140 L·mol<sup>-1</sup>·cm<sup>-1</sup>), 533 nm (ε = 14370 L·mol<sup>-1</sup>·cm<sup>-1</sup>).

## 2. Computational Details

All calculations were carried out with the ORCA program package.<sup>9,10</sup> Unless stated otherwise, all calculations were carried out in the gas phase. Density fitting techniques, also called resolution-of-identity approximation (RI)<sup>11</sup>, were used for *meta*-GGA calculations and the RIJCOSX<sup>12</sup> approximation was used for hybrid-GGA, DLPNO-CCSD(T) and CASSCF calculations. Atom-pairwise dispersion corrections with the Becke-Johnson damping (D3BJ)<sup>13,14</sup> were used for all DFT calculations. Orbital pictures were rendered with the software Chimaera.<sup>15</sup> All geometries were obtained at the TPSS-D3BJ/def2-TZVP<sup>16,17</sup> level of theory. For the formation of complex **8**<sup>-</sup>, relaxed surface scans with subsequent geometry optimisations were carried out to find the relevant minima and saddle points. Subsequently, single point calculations at the DLPNO-CCSD(T)/cc-pVDZ and DLPNO-CCSD(T)/cc-pVTZ level of theory were conducted.<sup>18,19</sup> The DLPNO-CCSD(T) energies obtained with the two basis sets were used for an extrapolation of the energies to the basis-set limit following a standard extrapolation scheme.<sup>31</sup> <sup>31</sup>P NMR chemical shifts of **9**<sup>2-</sup> were calculated with the TPSS0<sup>20</sup> functional using the def2-SVP, def2-TZVP and pcSseg-2<sup>21</sup> basis sets (see the Supporting Information). TDDFT calculations were performed at the  $\omega$ B97X-D3/def2-TZVP CPCM(THF)<sup>22</sup> level of theory. EDA-NOCV calculations were performed at the  $\omega$ B97X-D3/def2-QZVP<sup>17,23</sup> level of theory.

CASSCF calculations were performed using the def2-TZVP basis set. For [*rac*-**1**]<sup>-</sup>, [*rac*-**6**]<sup>-</sup>, [*rac*-**7**]<sup>-</sup> and [*meso*-**8**]<sup>-</sup>, the initial guess orbitals (obtained from a DFT calculation) contained the five 3d orbitals of cobalt, and two ligand-based orbitals. In addition, three orbitals of the 4d sub-shell of cobalt (so called “double-shell”) were included in the case of [*rac*-**1**]<sup>-</sup> and [*rac*-**6**]<sup>-</sup> to aid convergence. Thus, [*rac*-**1**]<sup>-</sup> and [*rac*-**6**]<sup>-</sup> are described with an active space of ten electrons in ten orbitals, whereas [*rac*-**7**]<sup>-</sup> and [*meso*-**8**]<sup>-</sup> are described with an active space of ten electrons in seven orbitals. In all cases, three 3d orbitals with occupation numbers close to 2.0 are found on the cobalt centres. Furthermore, two orbital pairs are obtained which describe the metal-ligand interactions ( $\sigma/\pi$ -donating and  $\pi$ -accepting) in every case. The metal-ligand bonding interactions are highly covalent in nature, making the assignment of an oxidation state of the cobalt centres somewhat ambiguous. However, TDDFT calculations and UV-vis spectroscopy support the assignment of a d<sup>8</sup> configuration to the cobalt centre in [*rac*-**1**]<sup>-</sup>, [*rac*-**6**]<sup>-</sup> and [*rac*-**7**]<sup>-</sup>, since lowest-energy electron excitations in these anions correspond to MLCT transitions. If the configuration at the cobalt atoms would be closer to a d<sup>6</sup> configuration, LMCT transitions would be expected to occur instead (see the main text for a detailed discussion of [*rac*-**7**]<sup>-</sup>).

For nickel complex *rac*-**2**, the final active space consists of the five 3d orbitals of Ni, an orbital localised at the bisphosphanido moiety and four orbitals of the 4d shell of Ni. Here, four 3d orbitals on Ni with occupation numbers close to 2.0 are found allowing for an assignment of a d<sup>8</sup> to the nickel centre.

Representative natural orbitals obtained from the CASSCF calculations are given further below.

### 3. Crystal structure tables

Crystal data and structure refinement for [K(dme)<sub>4</sub>][rac-1]

|                                   |                                                                                                              |                  |
|-----------------------------------|--------------------------------------------------------------------------------------------------------------|------------------|
| Empirical formula                 | C <sub>44</sub> H <sub>84</sub> B <sub>10</sub> Co <sub>1</sub> K <sub>1</sub> O <sub>8</sub> P <sub>2</sub> |                  |
| Formula weight                    | 1009.17                                                                                                      |                  |
| Temperature                       | 123 K                                                                                                        |                  |
| Wavelength                        | 1.54178 Å                                                                                                    |                  |
| Crystal system                    | Monoclinic                                                                                                   |                  |
| Space group                       | C2                                                                                                           |                  |
| Unit cell dimensions              | a = 17.3818(5) Å                                                                                             | a = 90°.         |
|                                   | b = 12.4973(3) Å                                                                                             | b = 121.991(3)°. |
|                                   | c = 15.0604(4) Å                                                                                             | g = 90°.         |
| Volume                            | 2774.66(15) Å <sup>3</sup>                                                                                   |                  |
| Z                                 | 2                                                                                                            |                  |
| Density (calculated)              | 1.208 Mg/m <sup>3</sup>                                                                                      |                  |
| Absorption coefficient            | 3.995 mm <sup>-1</sup>                                                                                       |                  |
| F(000)                            | 1076                                                                                                         |                  |
| Crystal size                      | 0.3 x 0.15 x 0.05 mm <sup>3</sup>                                                                            |                  |
| Theta range for data collection   | 3.460 to 73.936°.                                                                                            |                  |
| Index ranges                      | -21<=h<=20, -15<=k<=15, -18<=l<=18                                                                           |                  |
| Reflections collected             | 9514                                                                                                         |                  |
| Independent reflections           | 5348 [R(int) = 0.0258]                                                                                       |                  |
| Completeness to theta = 73.936°   | 98.0 %                                                                                                       |                  |
| Absorption correction             | Semi-empirical from equivalents                                                                              |                  |
| Max. and min. transmission        | 1.00000 and 0.76256                                                                                          |                  |
| Refinement method                 | Full-matrix least-squares on F <sup>2</sup>                                                                  |                  |
| Data / restraints / parameters    | 5348 / 1 / 307                                                                                               |                  |
| Goodness-of-fit on F <sup>2</sup> | 1.033                                                                                                        |                  |
| Final R indices [I>2σ(I)]         | R <sub>1</sub> = 0.0354, wR <sub>2</sub> = 0.0917                                                            |                  |
| R indices (all data)              | R <sub>1</sub> = 0.0361, wR <sub>2</sub> = 0.0925                                                            |                  |
| Absolute structure parameter      | 0.261(4)                                                                                                     |                  |
| Largest diff. peak and hole       | 0.582 and -0.233 e·Å <sup>-3</sup>                                                                           |                  |



Crystal data and structure refinement for *rac-2*

|                                      |                                                                    |                              |
|--------------------------------------|--------------------------------------------------------------------|------------------------------|
| Empirical formula                    | $C_{41}H_{56}B_{10}N_2NiP_2$                                       |                              |
| Formula weight                       | 805.62                                                             |                              |
| Temperature                          | 123 K                                                              |                              |
| Wavelength                           | 1.54178 Å                                                          |                              |
| Crystal system                       | Monoclinic                                                         |                              |
| Space group                          | $C2/c$                                                             |                              |
| Unit cell dimensions                 | $a = 17.5999(5)$ Å                                                 | $\alpha = 90^\circ$ .        |
|                                      | $b = 14.7143(4)$ Å                                                 | $\beta = 104.342(3)^\circ$ . |
|                                      | $c = 16.7284(5)$ Å                                                 | $\gamma = 90^\circ$ .        |
| Volume                               | $4197.1(2)$ Å <sup>3</sup>                                         |                              |
| Z                                    | 4                                                                  |                              |
| Density (calculated)                 | 1.275 Mg/m <sup>3</sup>                                            |                              |
| Absorption coefficient               | $1.620$ mm <sup>-1</sup>                                           |                              |
| F(000)                               | 1696                                                               |                              |
| Crystal size                         | 0.35 x 0.2 x 0.2 mm <sup>3</sup>                                   |                              |
| Theta range for data collection      | 3.968 to 68.245°.                                                  |                              |
| Index ranges                         | $-17 \leq h \leq 21$ , $-14 \leq k \leq 17$ , $-20 \leq l \leq 14$ |                              |
| Reflections collected                | 8371                                                               |                              |
| Independent reflections              | 3838 [R(int) = 0.0121]                                             |                              |
| Completeness to theta = 68.245°      | 99.7 %                                                             |                              |
| Absorption correction                | Semi-empirical from equivalents                                    |                              |
| Max. and min. transmission           | 1.00000 and 0.92333                                                |                              |
| Refinement method                    | Full-matrix least-squares on F <sup>2</sup>                        |                              |
| Data / restraints / parameters       | 3838 / 0 / 260                                                     |                              |
| Goodness-of-fit on F <sup>2</sup>    | 1.047                                                              |                              |
| Final R indices [ $I > 2\sigma(I)$ ] | $R_1 = 0.0309$ , $wR_2 = 0.0834$                                   |                              |
| R indices (all data)                 | $R_1 = 0.0316$ , $wR_2 = 0.0839$                                   |                              |
| Largest diff. peak and hole          | 0.267 and -0.263 e·Å <sup>-3</sup>                                 |                              |

Crystal data and structure refinement for [K(18-c-6)(dme)][rac-6]

|                                   |                                                                                                 |                   |
|-----------------------------------|-------------------------------------------------------------------------------------------------|-------------------|
| Empirical formula                 | C <sub>50</sub> H <sub>88</sub> B <sub>10</sub> CoKN <sub>2</sub> O <sub>8</sub> P <sub>2</sub> |                   |
| Formula weight                    | 1113.29                                                                                         |                   |
| Temperature                       | 123 K                                                                                           |                   |
| Wavelength                        | 1.54178 Å                                                                                       |                   |
| Crystal system                    | Monoclinic                                                                                      |                   |
| Space group                       | P2 <sub>1</sub> /n                                                                              |                   |
| Unit cell dimensions              | a = 20.6366(3) Å                                                                                | α = 90°.          |
|                                   | b = 13.1049(2) Å                                                                                | β = 90.4440(10)°. |
|                                   | c = 21.8850(3) Å                                                                                | γ = 90°.          |
| Volume                            | 5918.41(15) Å <sup>3</sup>                                                                      |                   |
| Z                                 | 4                                                                                               |                   |
| Density (calculated)              | 1.249 Mg/m <sup>3</sup>                                                                         |                   |
| Absorption coefficient            | 3.805 mm <sup>-1</sup>                                                                          |                   |
| F(000)                            | 2368                                                                                            |                   |
| Crystal size                      | 0.4 x 0.2 x 0.05 mm <sup>3</sup>                                                                |                   |
| Theta range for data collection   | 2.932 to 89.548°.                                                                               |                   |
| Index ranges                      | -19<=h<=26, -16<=k<=7, -26<=l<=28                                                               |                   |
| Reflections collected             | 27740                                                                                           |                   |
| Independent reflections           | 13400 [R(int) = 0.0249]                                                                         |                   |
| Completeness to theta = 89.548°   | 99.1 %                                                                                          |                   |
| Absorption correction             | Semi-empirical from equivalents                                                                 |                   |
| Max. and min. transmission        | 1.00000 and 0.82770                                                                             |                   |
| Refinement method                 | Full-matrix least-squares on F <sup>2</sup>                                                     |                   |
| Data / restraints / parameters    | 13400 / 7 / 784                                                                                 |                   |
| Goodness-of-fit on F <sup>2</sup> | 1.043                                                                                           |                   |
| Final R indices [I>2sigma(I)]     | R <sub>1</sub> = 0.0388, wR <sub>2</sub> = 0.0992                                               |                   |
| R indices (all data)              | R <sub>1</sub> = 0.0490, wR <sub>2</sub> = 0.1080                                               |                   |
| Largest diff. peak and hole       | 0.853 and -0.307 e·Å <sup>-3</sup>                                                              |                   |

Crystal data and structure refinement for [K(dme)<sub>4</sub>][rac-7]

|                                   |                                                                                  |                  |
|-----------------------------------|----------------------------------------------------------------------------------|------------------|
| Empirical formula                 | C <sub>46</sub> H <sub>90</sub> B <sub>10</sub> CoKO <sub>8</sub> P <sub>4</sub> |                  |
| Formula weight                    | 1101.18                                                                          |                  |
| Temperature                       | 123 K                                                                            |                  |
| Wavelength                        | 1.54178 Å                                                                        |                  |
| Crystal system                    | Triclinic                                                                        |                  |
| Space group                       | P-1                                                                              |                  |
| Unit cell dimensions              | a = 10.5646(2) Å                                                                 | α = 91.272(1)°.  |
|                                   | b = 16.0317(3) Å                                                                 | β = 103.576(1)°. |
|                                   | c = 18.5427(3) Å                                                                 | γ = 93.528(1)°.  |
| Volume                            | 3044.84(10) Å <sup>3</sup>                                                       |                  |
| Z                                 | 2                                                                                |                  |
| Density (calculated)              | 1.201 Mg/m <sup>3</sup>                                                          |                  |
| Absorption coefficient            | 4.162 mm <sup>-1</sup>                                                           |                  |
| F(000)                            | 1172                                                                             |                  |
| Crystal size                      | 0.35 x 0.1 x 0.1 mm <sup>3</sup>                                                 |                  |
| Theta range for data collection   | 3.626 to 73.903°.                                                                |                  |
| Index ranges                      | -13<=h<=12, -18<=k<=19, -20<=l<=23                                               |                  |
| Reflections collected             | 50649                                                                            |                  |
| Independent reflections           | 12295 [R(int) = 0.0391]                                                          |                  |
| Completeness to theta = 73.903°   | 99.7 %                                                                           |                  |
| Absorption correction             | Semi-empirical from equivalents                                                  |                  |
| Max. and min. transmission        | 1.00000 and 0.60305                                                              |                  |
| Refinement method                 | Full-matrix least-squares on F <sup>2</sup>                                      |                  |
| Data / restraints / parameters    | 12295 / 0 / 651                                                                  |                  |
| Goodness-of-fit on F <sup>2</sup> | 1.031                                                                            |                  |
| Final R indices [I>2σ(I)]         | R <sub>1</sub> = 0.0357, wR <sub>2</sub> = 0.0971                                |                  |
| R indices (all data)              | R <sub>1</sub> = 0.0362, wR <sub>2</sub> = 0.0977                                |                  |
| Largest diff. peak and hole       | 0.669 and -0.475 e·Å <sup>-3</sup>                                               |                  |

Crystal data and structure refinement for [K(18-c-6)(dme)<sub>2</sub>][meso-8]

|                                   |                                                                                   |                  |
|-----------------------------------|-----------------------------------------------------------------------------------|------------------|
| Empirical formula                 | C <sub>40</sub> H <sub>76</sub> B <sub>10</sub> CoKO <sub>10</sub> P <sub>6</sub> |                  |
| Formula weight                    | 1108.95                                                                           |                  |
| Temperature                       | 123 K                                                                             |                  |
| Wavelength                        | 1.39222 Å                                                                         |                  |
| Crystal system                    | Monoclinic                                                                        |                  |
| Space group                       | P2 <sub>1</sub>                                                                   |                  |
| Unit cell dimensions              | a = 13.2511(4) Å                                                                  | α = 90°.         |
|                                   | b = 18.2870(3) Å                                                                  | β = 103.026(3)°. |
|                                   | c = 13.4608(3) Å                                                                  | γ = 90°.         |
| Volume                            | 3177.93(14) Å <sup>3</sup>                                                        |                  |
| Z                                 | 2                                                                                 |                  |
| Density (calculated)              | 1.159 Mg/m <sup>3</sup>                                                           |                  |
| Absorption coefficient            | 3.343 mm <sup>-1</sup>                                                            |                  |
| F(000)                            | 1164                                                                              |                  |
| Crystal size                      | 0.6 x 0.2528 x 0.0806 mm <sup>3</sup>                                             |                  |
| Theta range for data collection   | 3.745 to 57.000°.                                                                 |                  |
| Index ranges                      | -15 ≤ h ≤ 15, -14 ≤ k ≤ 21, -16 ≤ l ≤ 13                                          |                  |
| Reflections collected             | 11905                                                                             |                  |
| Independent reflections           | 8212 [R(int) = 0.0356]                                                            |                  |
| Completeness to theta = 57.000°   | 98.9 %                                                                            |                  |
| Absorption correction             | Semi-empirical from equivalents                                                   |                  |
| Max. and min. transmission        | 1.00000 and 0.54908                                                               |                  |
| Refinement method                 | Full-matrix least-squares on F <sup>2</sup>                                       |                  |
| Data / restraints / parameters    | 8212 / 19 / 624                                                                   |                  |
| Goodness-of-fit on F <sup>2</sup> | 0.993                                                                             |                  |
| Final R indices [I > 2σ(I)]       | R <sub>1</sub> = 0.0520, wR <sub>2</sub> = 0.1328                                 |                  |
| R indices (all data)              | R <sub>1</sub> = 0.0660, wR <sub>2</sub> = 0.1432                                 |                  |
| Absolute structure parameter      | 0.47 (1)                                                                          |                  |
| Largest diff. peak and hole       | 0.899 and -0.386 e·Å <sup>-3</sup>                                                |                  |

Crystal data and structure refinement for [K(dme)][K(dme)<sub>2</sub>][rac-9]

|                                   |                                                                                                                |                  |
|-----------------------------------|----------------------------------------------------------------------------------------------------------------|------------------|
| Empirical formula                 | C <sub>96</sub> H <sub>168</sub> B <sub>40</sub> Co <sub>4</sub> K <sub>2</sub> O <sub>8</sub> P <sub>16</sub> |                  |
| Formula weight                    | 2692.13                                                                                                        |                  |
| Temperature                       | 123 K                                                                                                          |                  |
| Wavelength                        | 1.54178 Å                                                                                                      |                  |
| Crystal system                    | Monoclinic                                                                                                     |                  |
| Space group                       | P2 <sub>1</sub> /m                                                                                             |                  |
| Unit cell dimensions              | a = 19.3026(8) Å                                                                                               | α = 90°.         |
|                                   | b = 20.5879(7) Å                                                                                               | β = 112.895(4)°. |
|                                   | c = 24.2008(8) Å                                                                                               | γ = 90°.         |
| Volume                            | 8859.7(6) Å <sup>3</sup>                                                                                       |                  |
| Z                                 | 2                                                                                                              |                  |
| Density (calculated)              | 1.009 Mg/m <sup>3</sup>                                                                                        |                  |
| Absorption coefficient            | 4.951 mm <sup>-1</sup>                                                                                         |                  |
| F(000)                            | 2788                                                                                                           |                  |
| Crystal size                      | 0.15 x 0.05 x 0.05 mm <sup>3</sup>                                                                             |                  |
| Theta range for data collection   | 3.773 to 74.215°.                                                                                              |                  |
| Index ranges                      | -23 ≤ h ≤ 21, -25 ≤ k ≤ 25, -30 ≤ l ≤ 28                                                                       |                  |
| Reflections collected             | 36055                                                                                                          |                  |
| Independent reflections           | 17876 [R(int) = 0.0642]                                                                                        |                  |
| Completeness to theta = 74.215°   | 96.2 %                                                                                                         |                  |
| Absorption correction             | Semi-empirical from equivalents                                                                                |                  |
| Max. and min. transmission        | 1.00000 and 0.73552                                                                                            |                  |
| Refinement method                 | Full-matrix least-squares on F <sup>2</sup>                                                                    |                  |
| Data / restraints / parameters    | 17876 / 0 / 858                                                                                                |                  |
| Goodness-of-fit on F <sup>2</sup> | 1.026                                                                                                          |                  |
| Final R indices [I > 2σ(I)]       | R <sub>1</sub> = 0.0830, wR <sub>2</sub> = 0.2090                                                              |                  |
| R indices (all data)              | R <sub>1</sub> = 0.1185, wR <sub>2</sub> = 0.2318                                                              |                  |
| Largest diff. peak and hole       | 2.418 and -0.603 e·Å <sup>-3</sup>                                                                             |                  |

## 4. NMR spectra

### *rac-5*

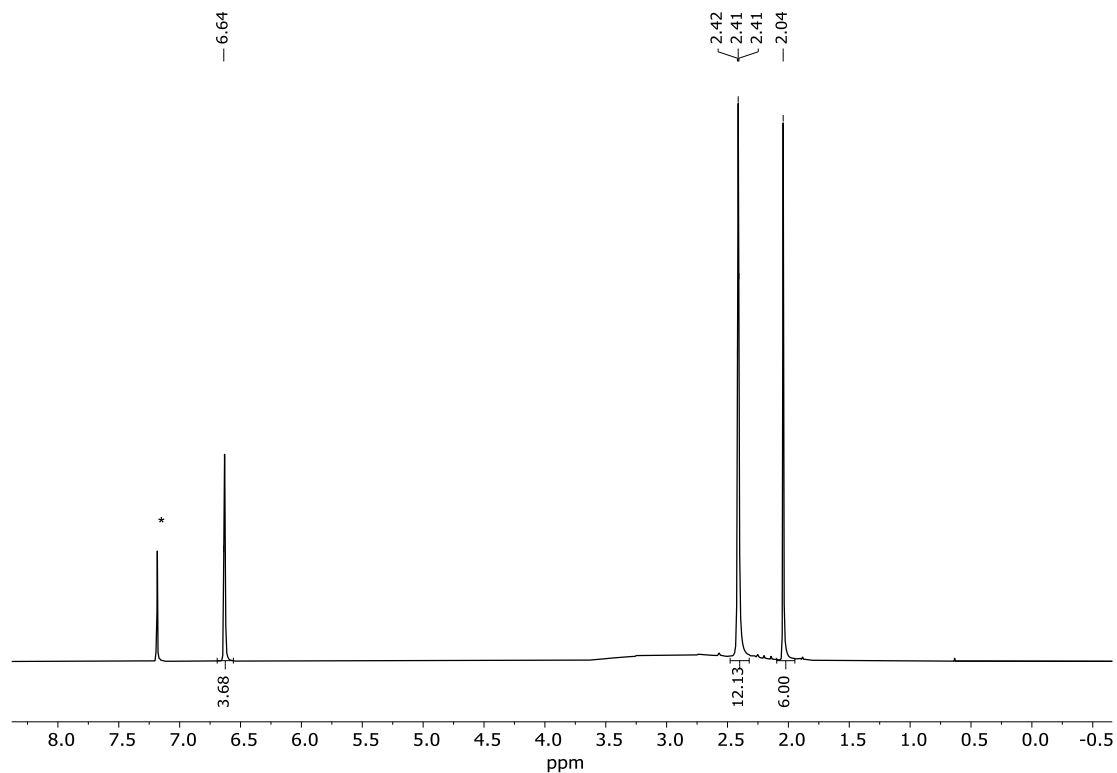

Figure S1:  $^1\text{H}$  NMR spectrum of *rac-5* in  $\text{C}_6\text{D}_6$ . (\*:  $\text{C}_6\text{D}_6$ ).

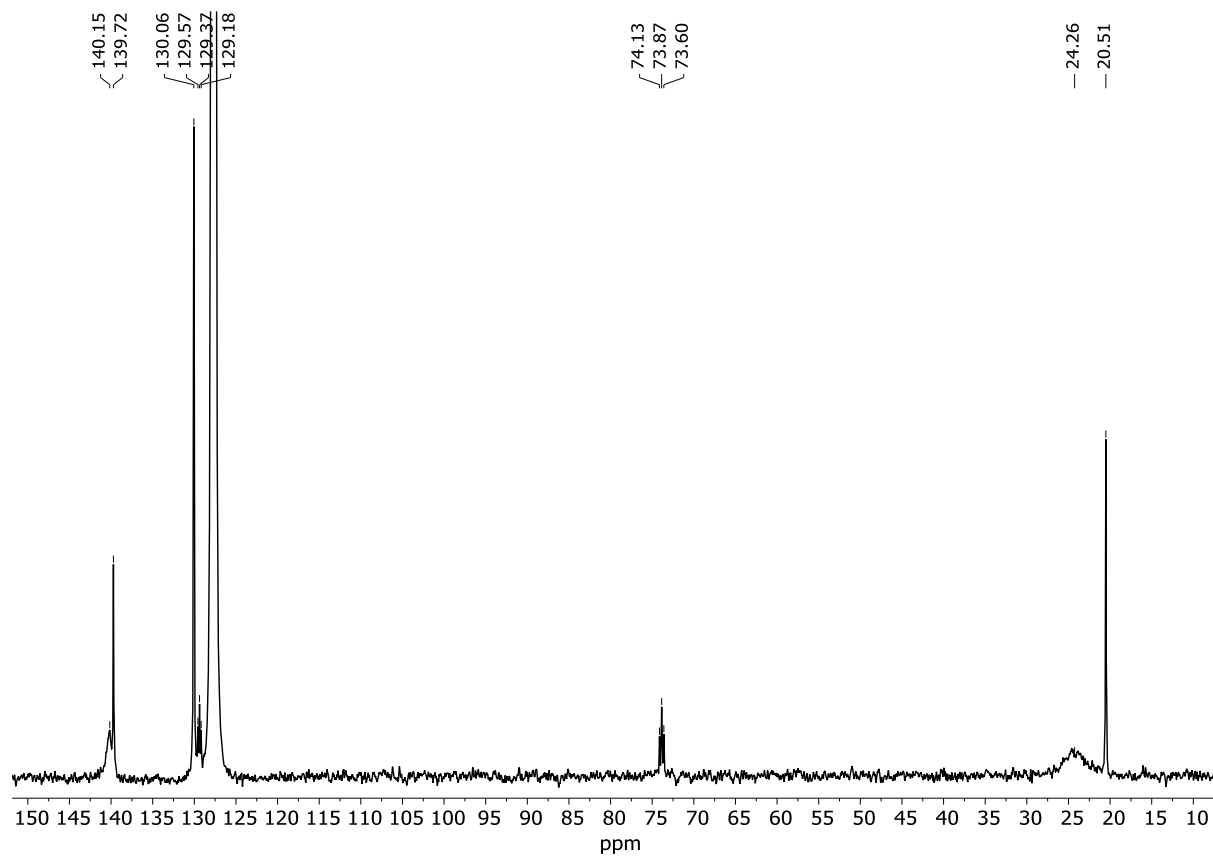

Figure S2:  $^{13}\text{C}\{^1\text{H}\}$  NMR spectrum of *rac-5* in  $\text{C}_6\text{D}_6$ . (\*:  $\text{C}_6\text{D}_6$ ).

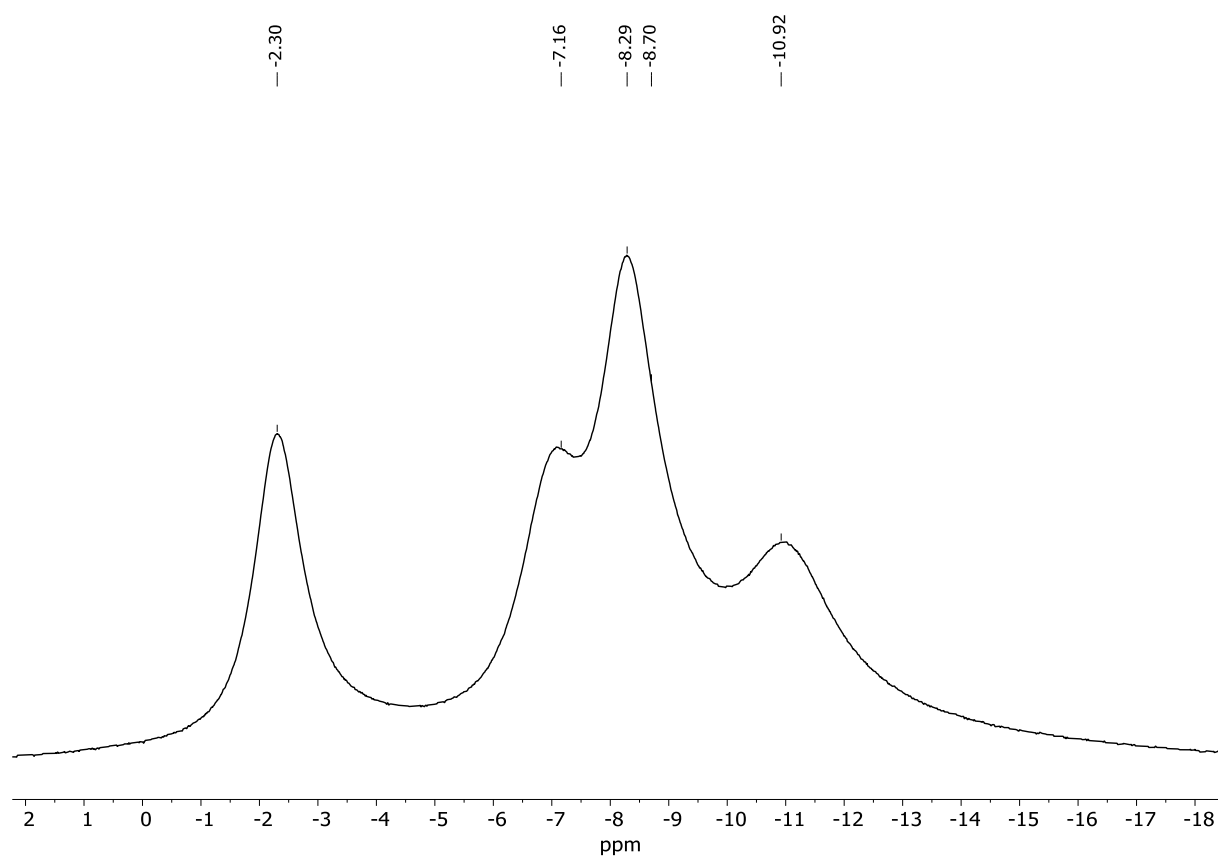

Figure S3:  $^{11}\text{B}\{^1\text{H}\}$  NMR spectrum of *rac*-5 in  $\text{C}_6\text{D}_6$ .

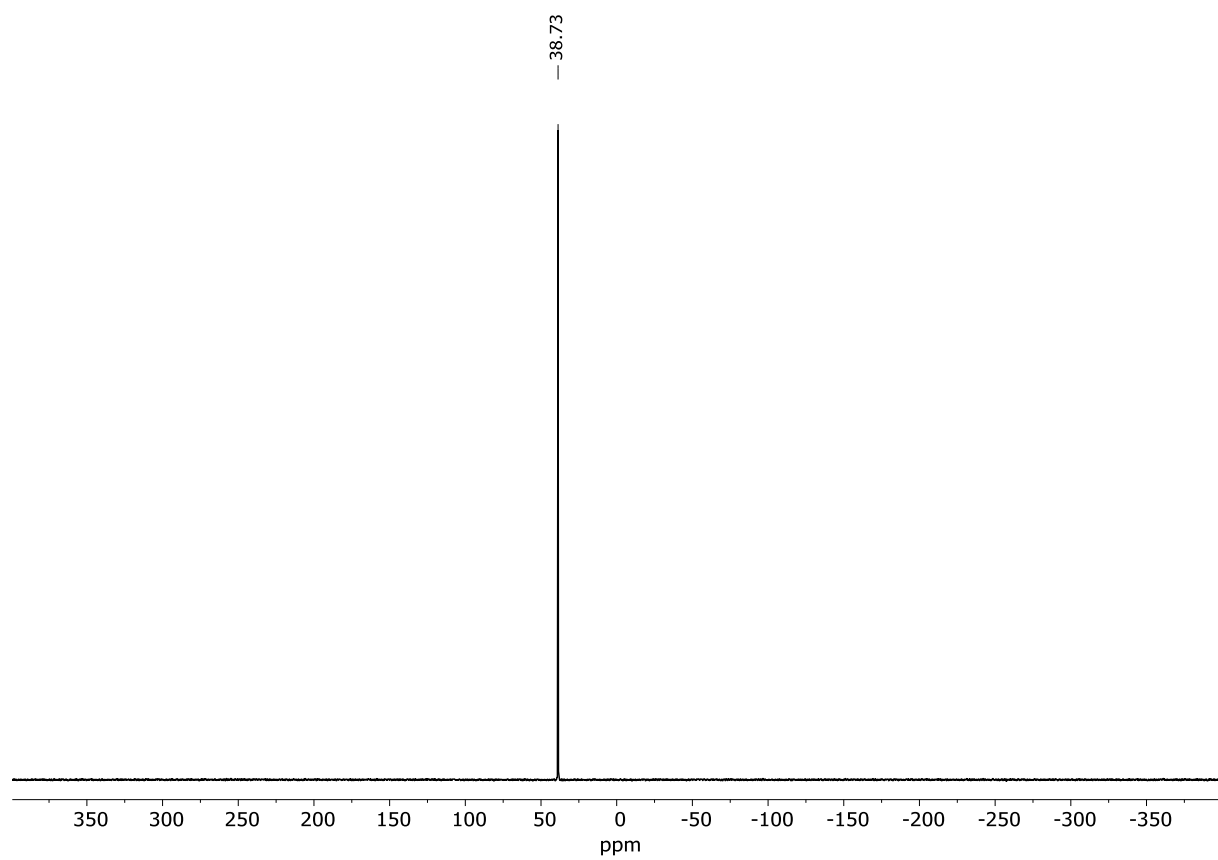

Figure S4:  $^{31}\text{P}\{^1\text{H}\}$  NMR spectrum of *rac*-5 in  $\text{C}_6\text{D}_6$ .

[K(18-c-6)(thf)][rac-1]

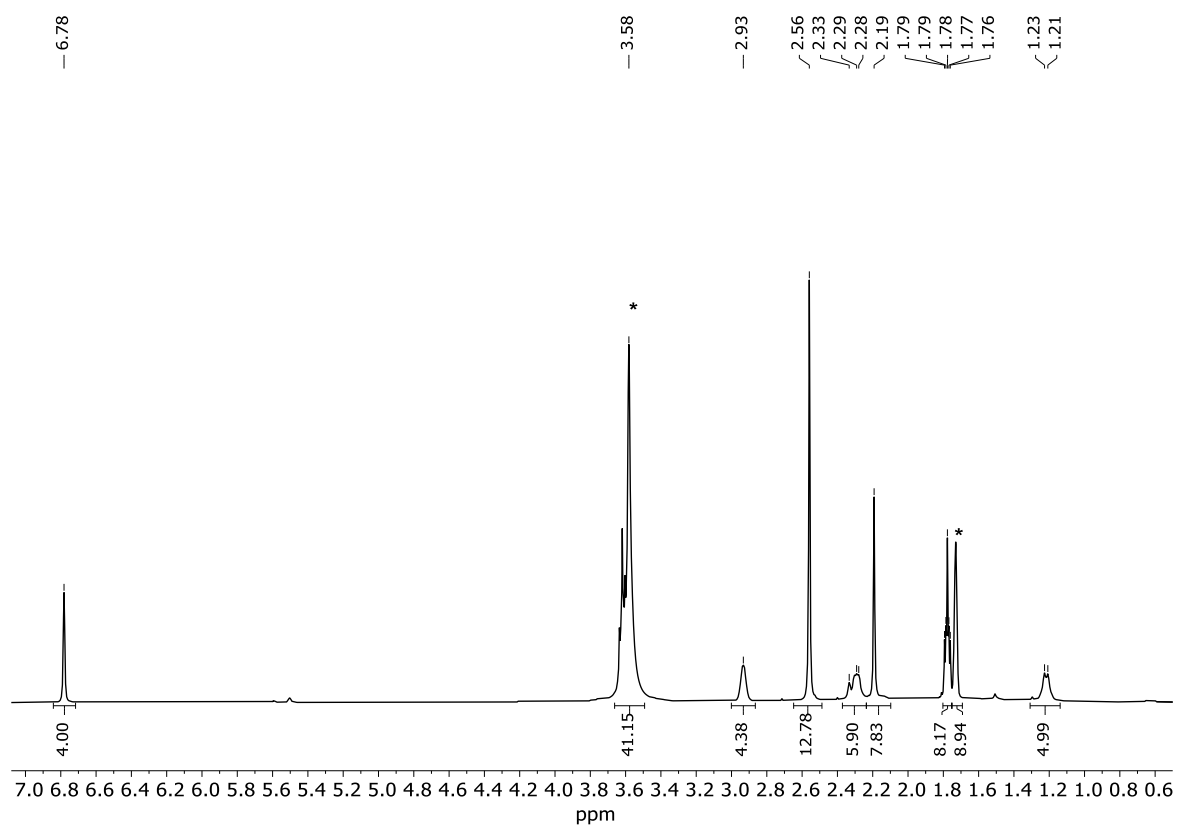

Figure S5:  $^1\text{H}$  NMR spectrum of [K(18-c-6)(thf)][rac-1] in THF- $d_8$ . (\*: THF- $d_8$ )

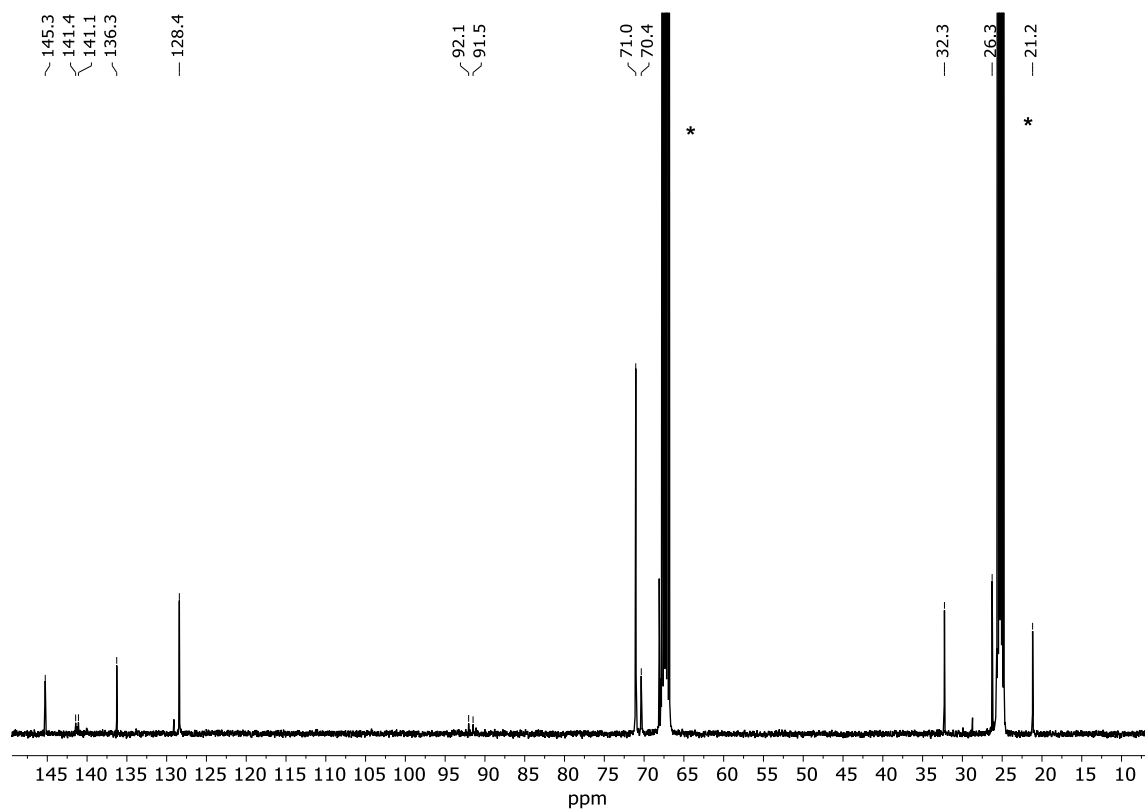

Figure S6:  $^{13}\text{C}\{^1\text{H}\}$  NMR spectrum of [K(18-c-6)(thf)][rac-1] in THF- $d_8$ . (\*: THF- $d_8$ )



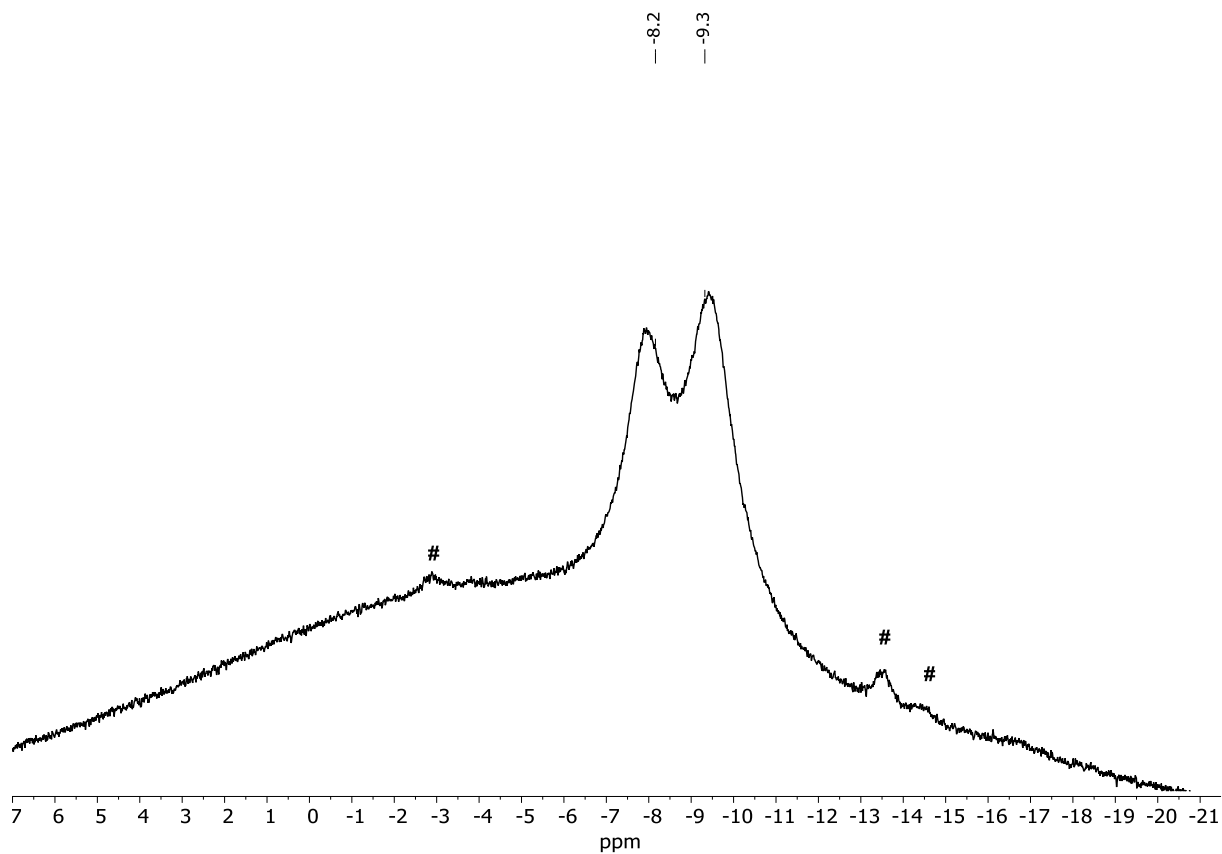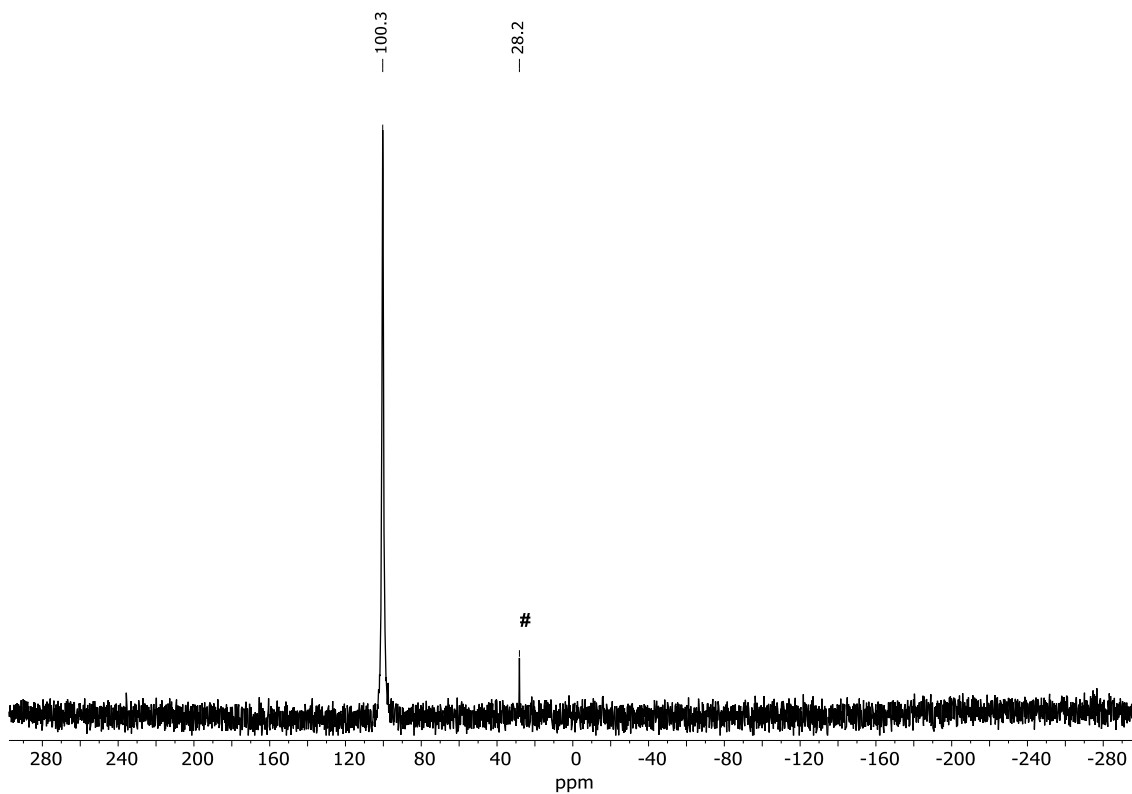

*rac-2*

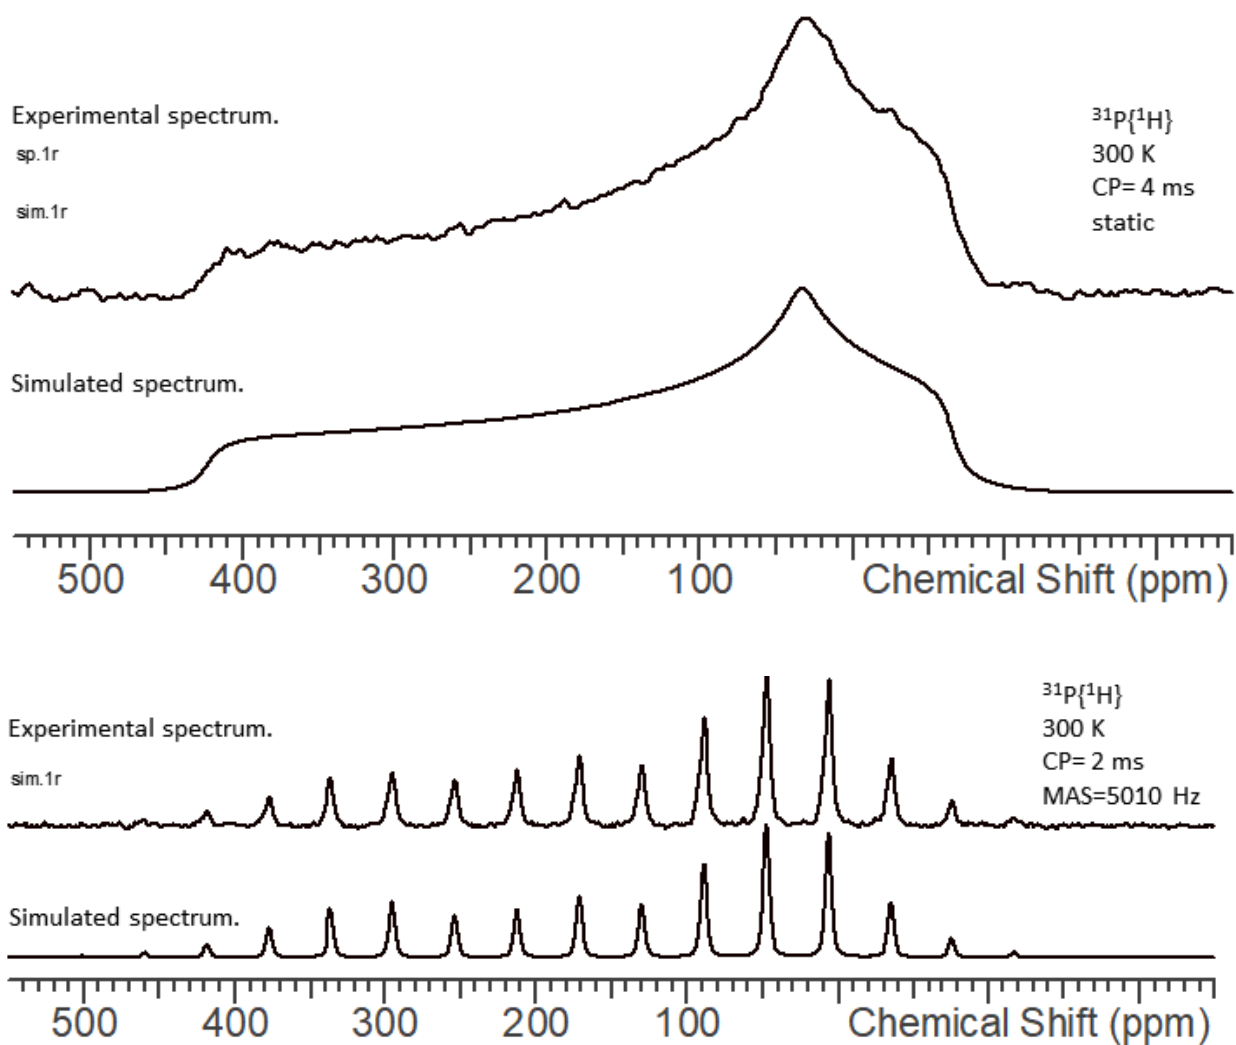

Figure S9:  $^{31}\text{P}\{^1\text{H}\}$  NMR spectrum of *rac-2* in the solid-state (top: static, bottom: magic-angle spinning at 5010 Hz).

[K(18-c-6)(dme)][rac-6]

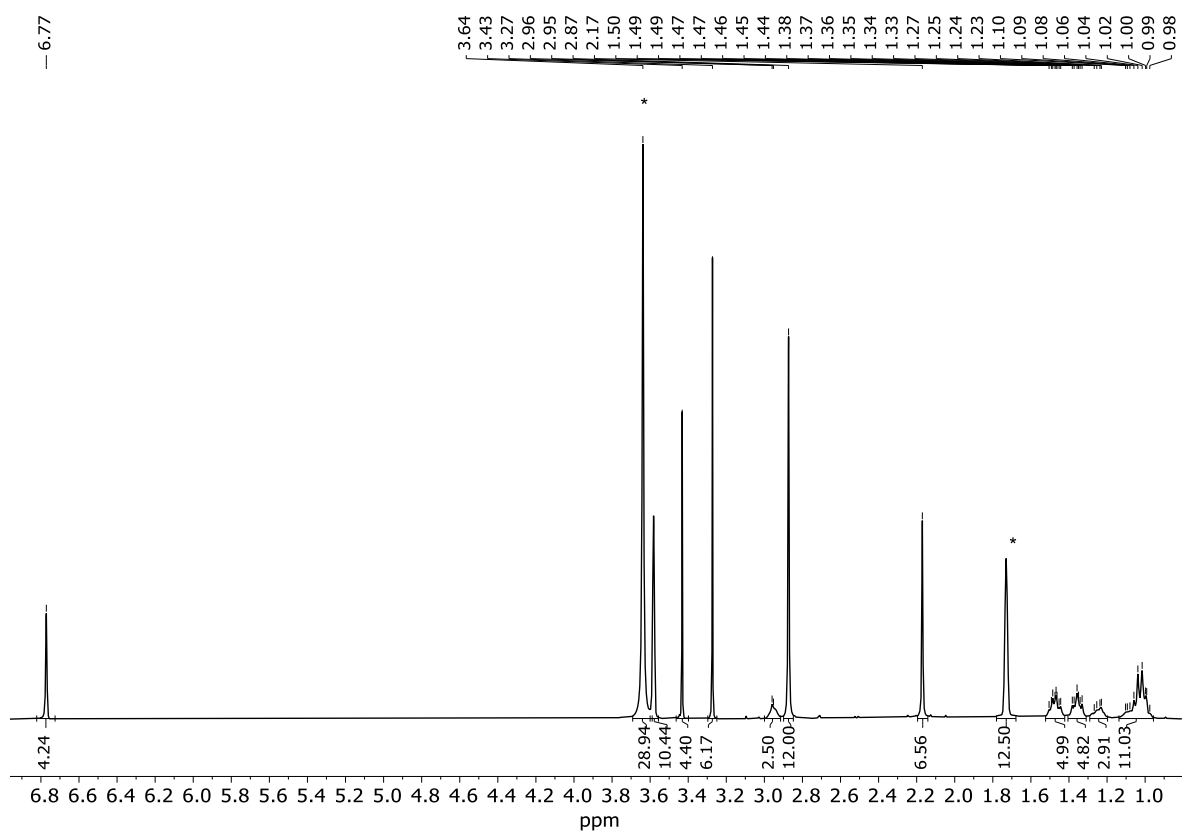

Figure S10:  $^1\text{H}$  NMR spectrum of [K(18-c-6)(dme)][rac-6] in THF- $d_8$ . (\*: THF- $d_8$ )

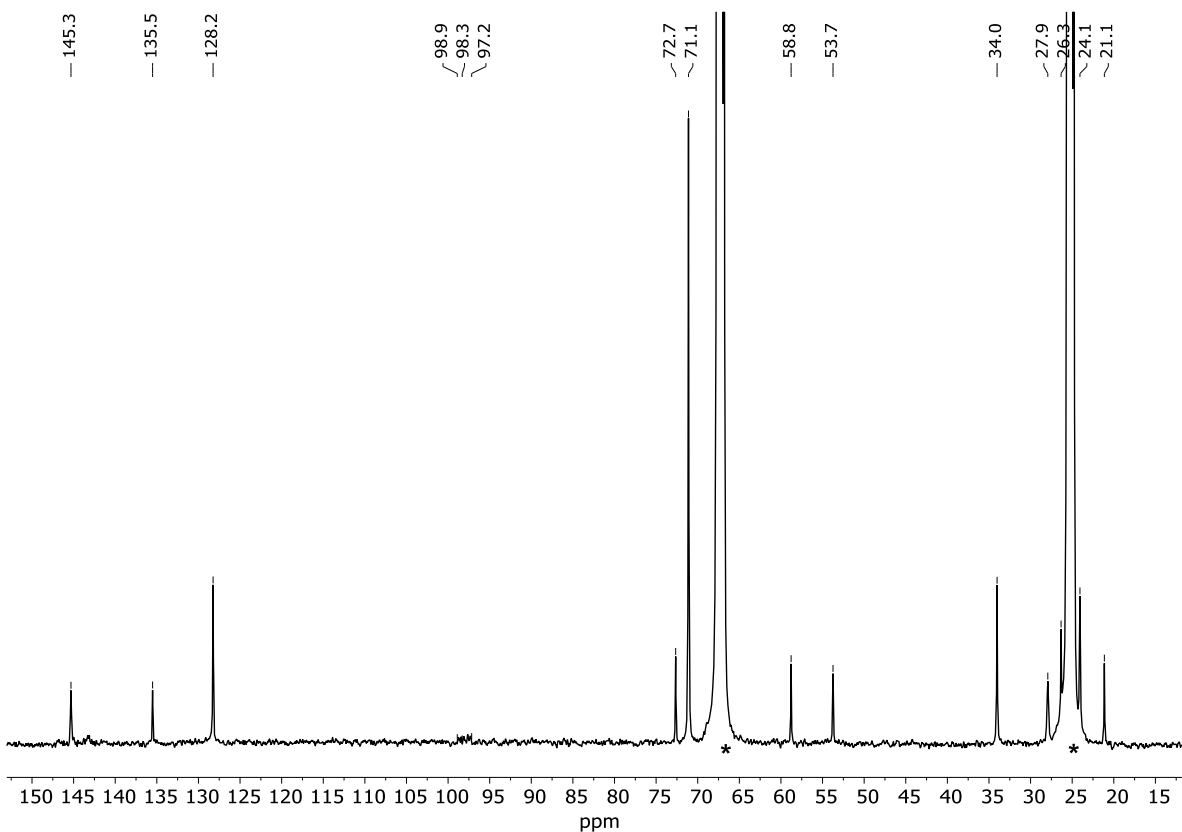

Figure S11:  $^{13}\text{C}\{^1\text{H}\}$  NMR spectrum of [K(18-c-6)(dme)][rac-6] in THF- $d_8$ . (\*: THF- $d_8$ )

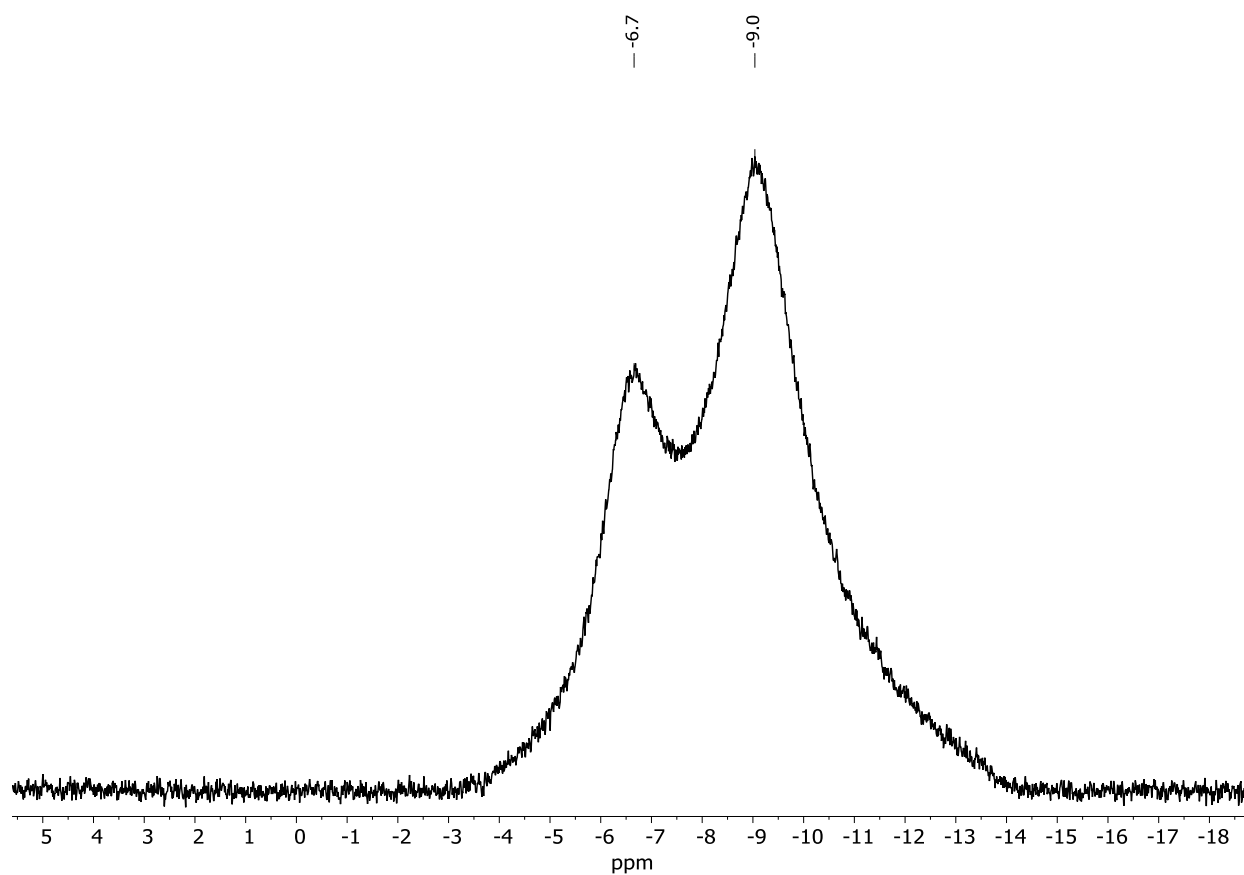

Figure S12:  $^{11}\text{B}\{^1\text{H}\}$  NMR spectrum of  $[\text{K}(18\text{-c-6})(\text{dme})][\text{rac-6}]$  in  $\text{THF-d}_8$ .

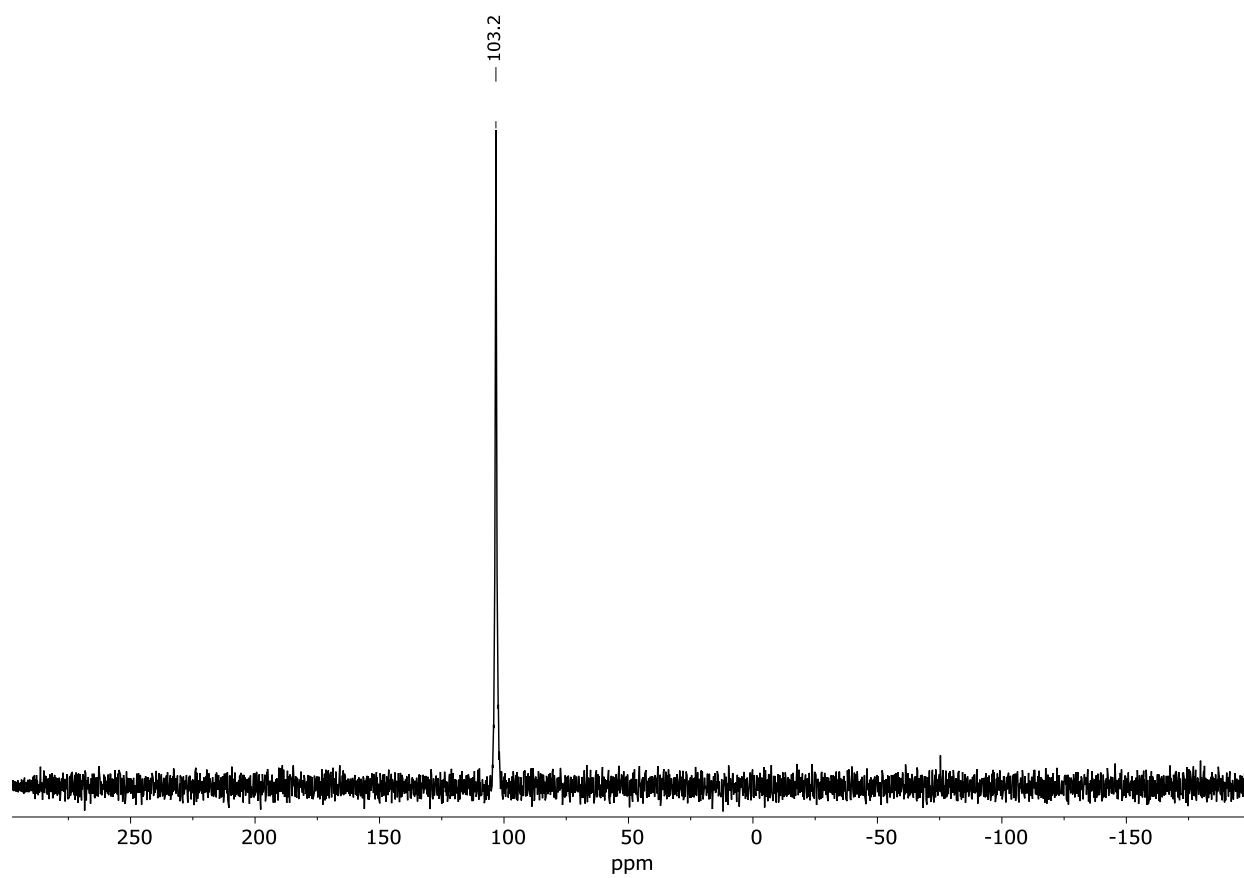

Figure S13:  $^{31}\text{P}\{^1\text{H}\}$  NMR spectrum of  $[\text{K}(18\text{-c-6})(\text{dme})][\text{rac-6}]$  in  $\text{THF-d}_8$ .

[K(18-c-6)][rac-7]

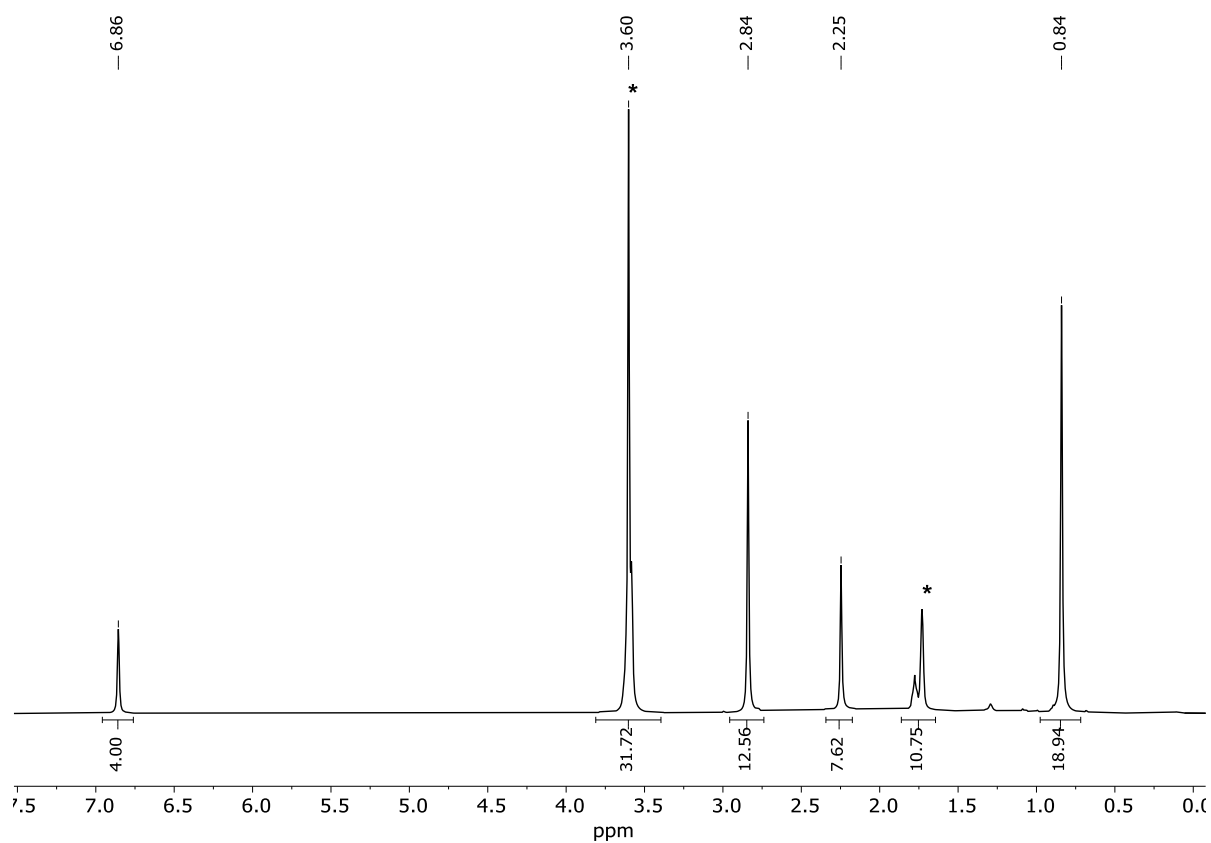

Figure S14:  $^1\text{H}$  NMR spectrum of [K(18-c-6)][rac-7] in THF- $d_8$ . (\*: THF- $d_8$ )

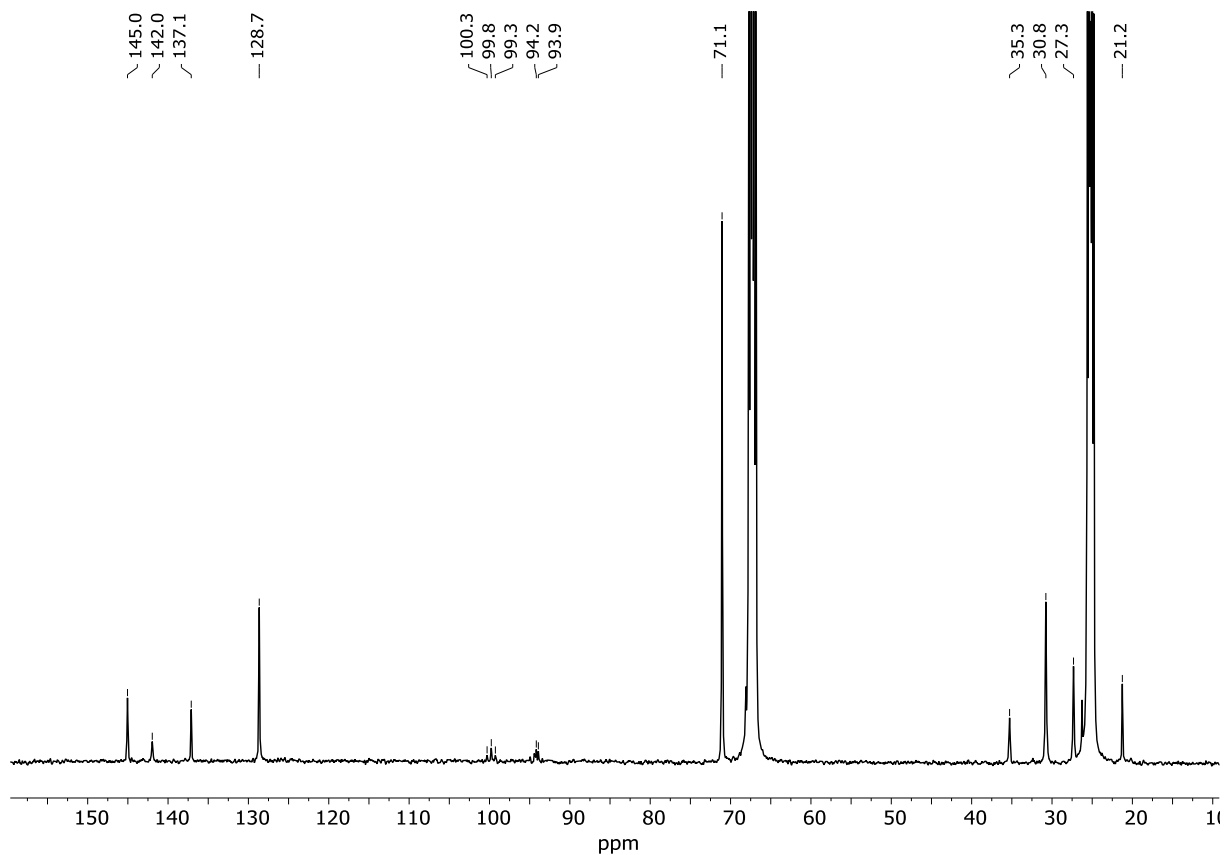

Figure S15:  $^{13}\text{C}\{^1\text{H}\}$  NMR spectrum of [K(18-c-6)][rac-7] in THF- $d_8$ . (\*: THF- $d_8$ )

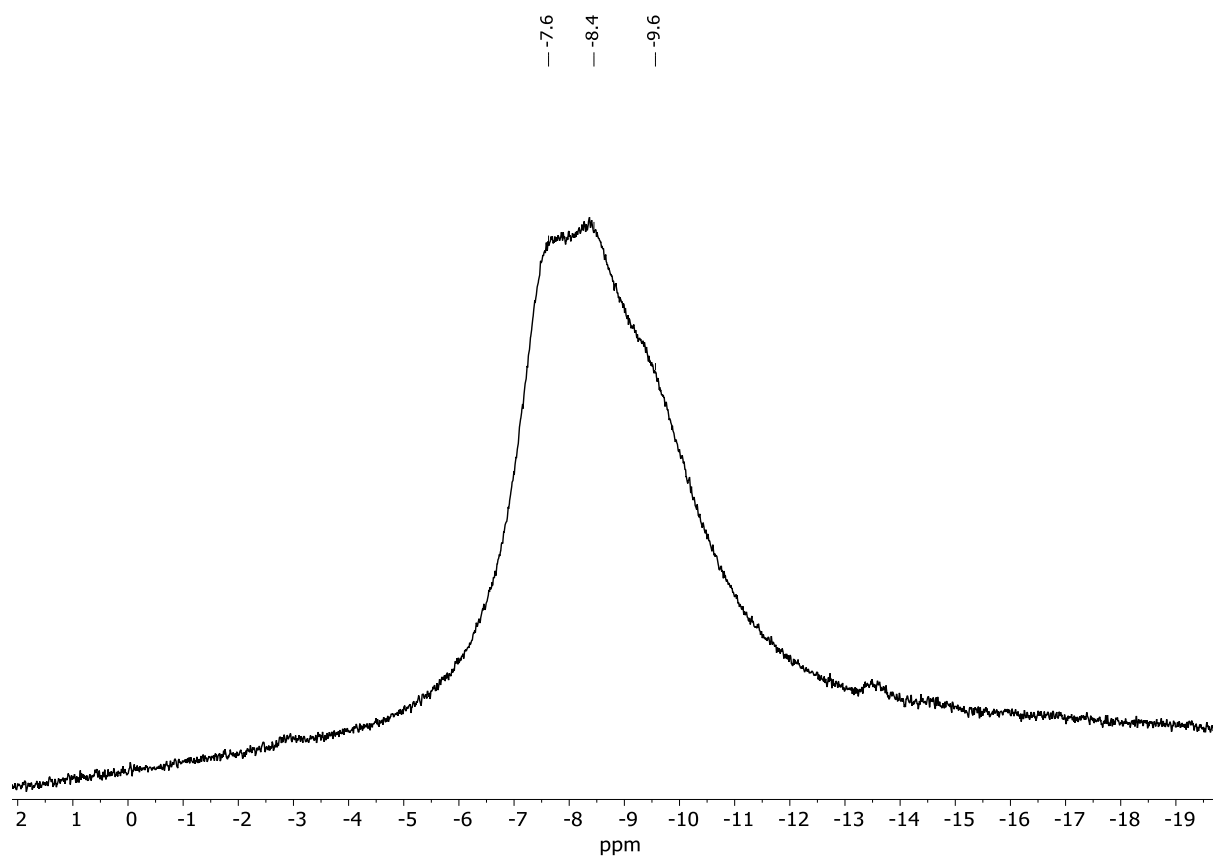

Figure S16:  $^{11}\text{B}\{^1\text{H}\}$  NMR spectrum of  $[\text{K}(18\text{-c-}6)][\text{rac-}7]$  in  $\text{THF-d}_8$ .

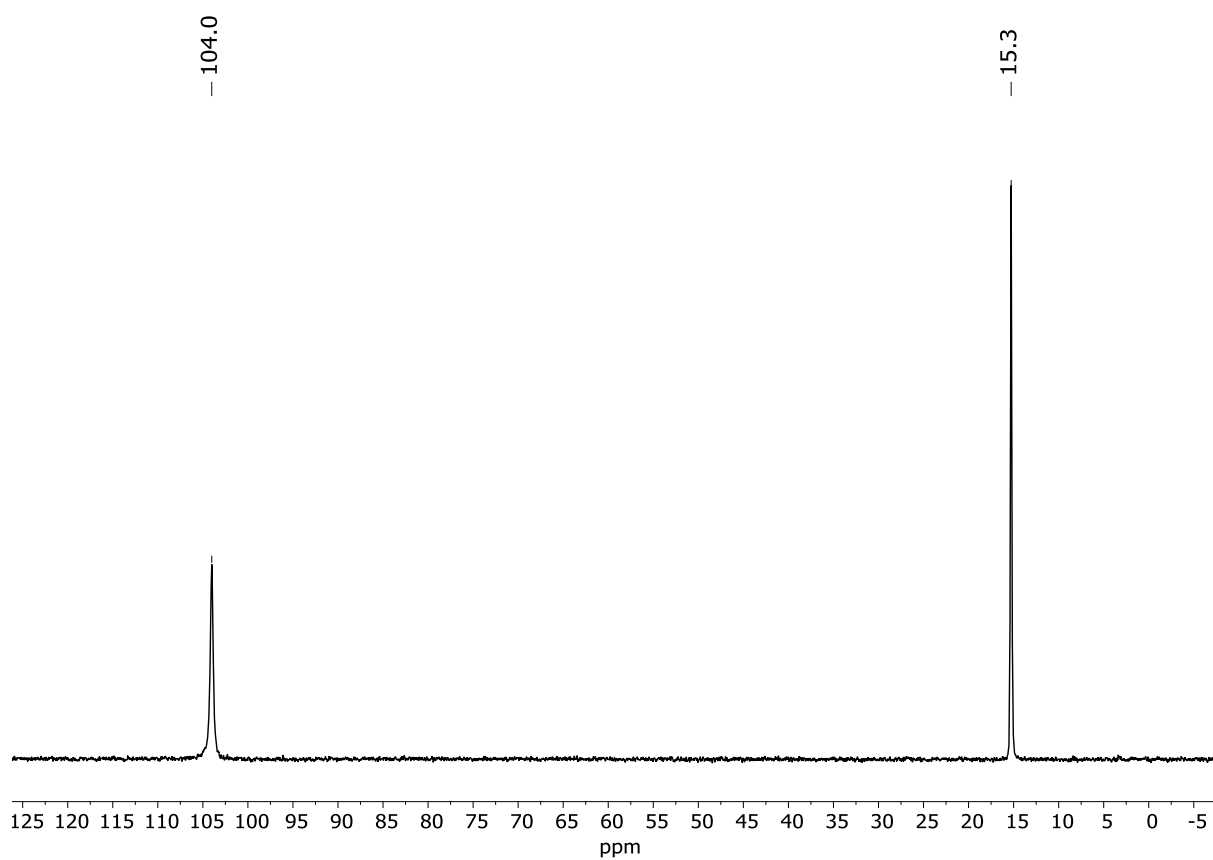

Figure S17:  $^{31}\text{P}\{^1\text{H}\}$  NMR spectrum of  $[\text{K}(18\text{-c-}6)][\text{rac-}7]$  in  $\text{THF-d}_8$ .

[K(18-c-6)][*meso*-8]

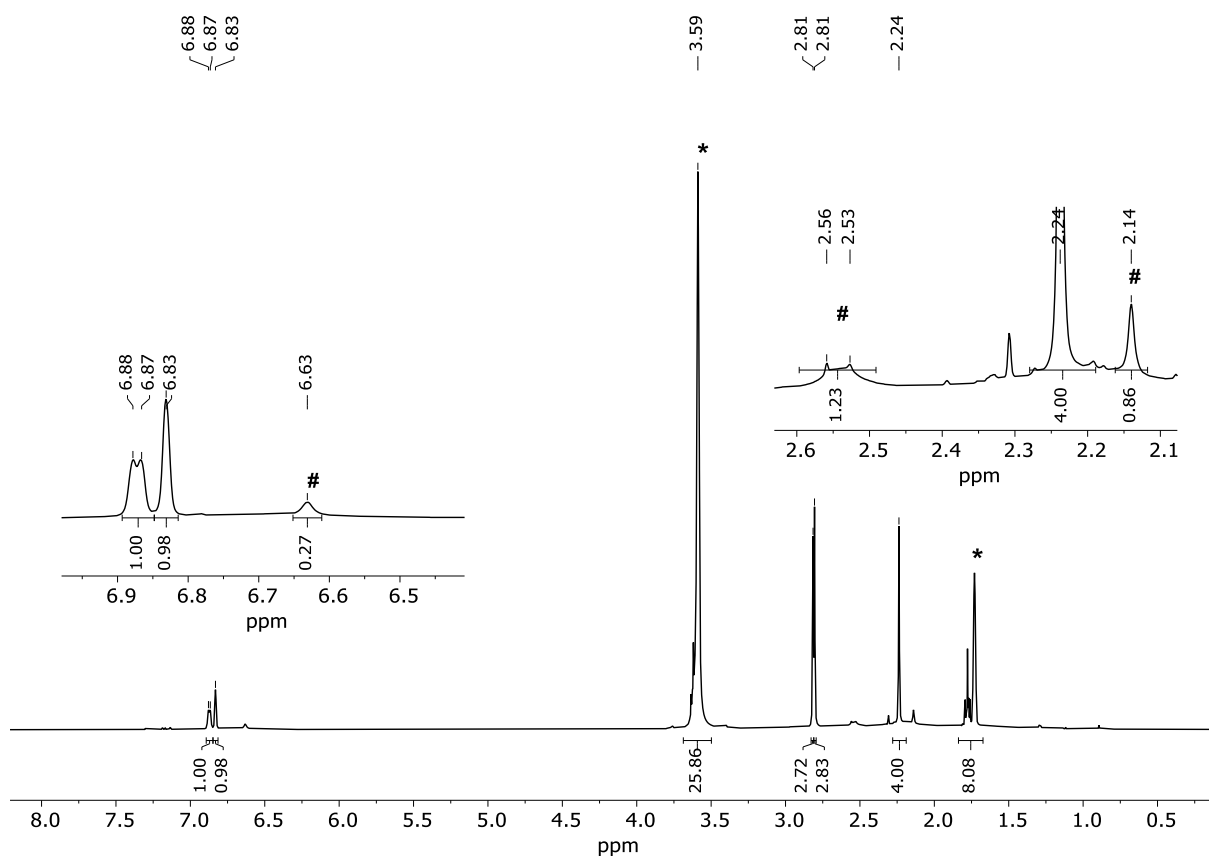

Figure S18:  $^1\text{H}$  NMR spectrum of [K(18-c-6)][*meso*-8] in THF- $\text{d}_8$ . Enlarged areas show contaminations of [K(18-c-6)] $_2$ [*rac*-9] (#). (\*: THF- $\text{d}_8$ )

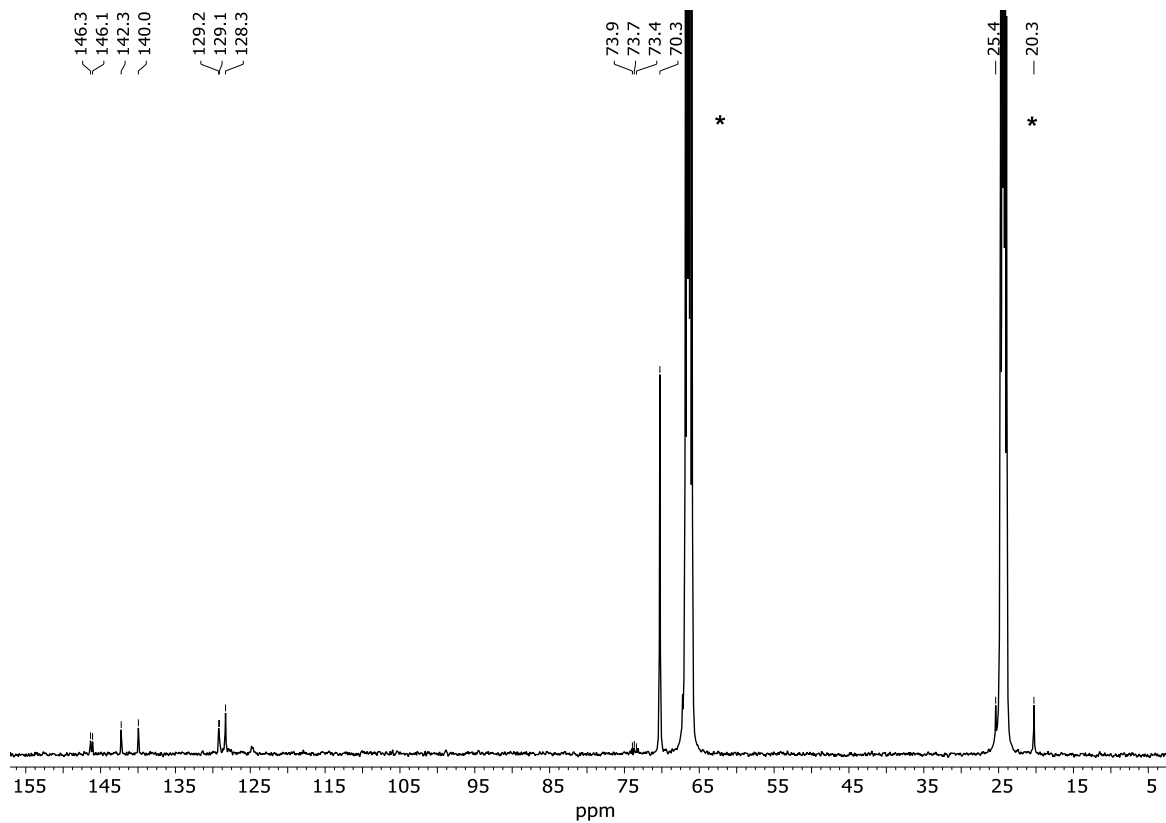

Figure S19:  $^{13}\text{C}\{^1\text{H}\}$  NMR spectrum of  $[\text{K}(18\text{-c-}6)]\text{meso-8}$  in  $\text{THF-d}_8$ . (\*:  $\text{THF-d}_8$ )

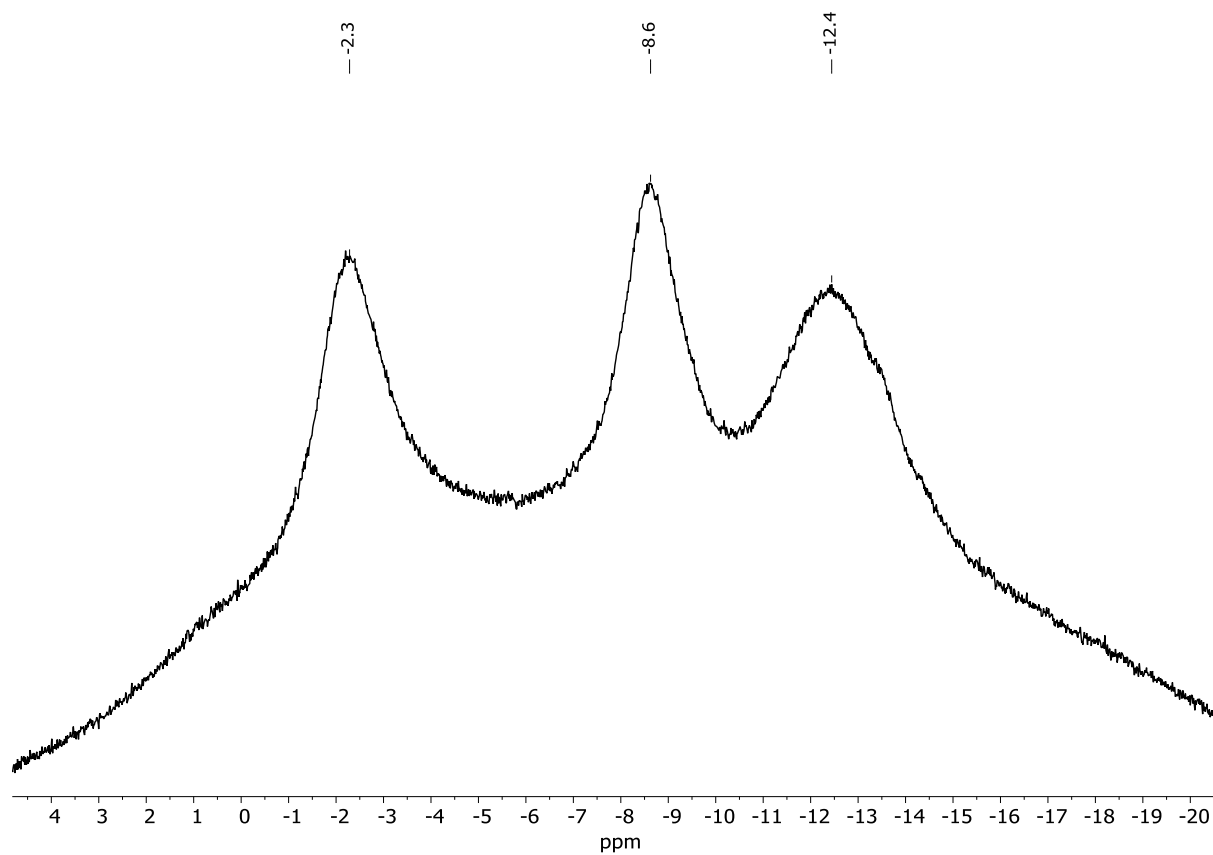

Figure S20:  $^{11}\text{B}\{^1\text{H}\}$  NMR spectrum of  $[\text{K}(18\text{-c-}6)]\text{meso-8}$  in  $\text{THF-d}_8$ .



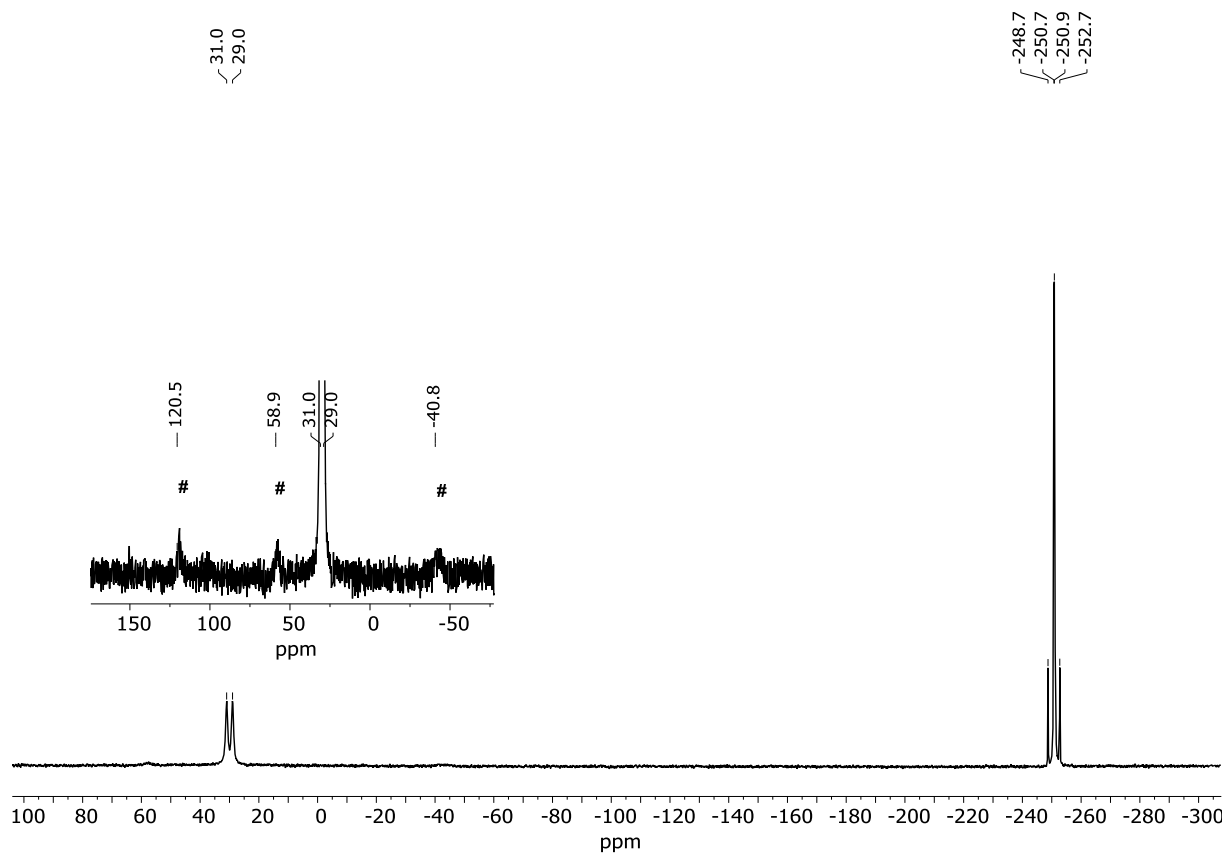

Figure S21:  $^{31}\text{P}\{^1\text{H}\}$  NMR spectrum of  $[\text{K}(\text{18-c-6})]\text{meso-8}$  in  $\text{THF-d}_8$ . Enlarged areas show contaminations of  $[\text{K}(\text{18-c-6})]_2\mathbf{9}$  (#).

[K(18-c-6)]<sub>2</sub>[rac-9]

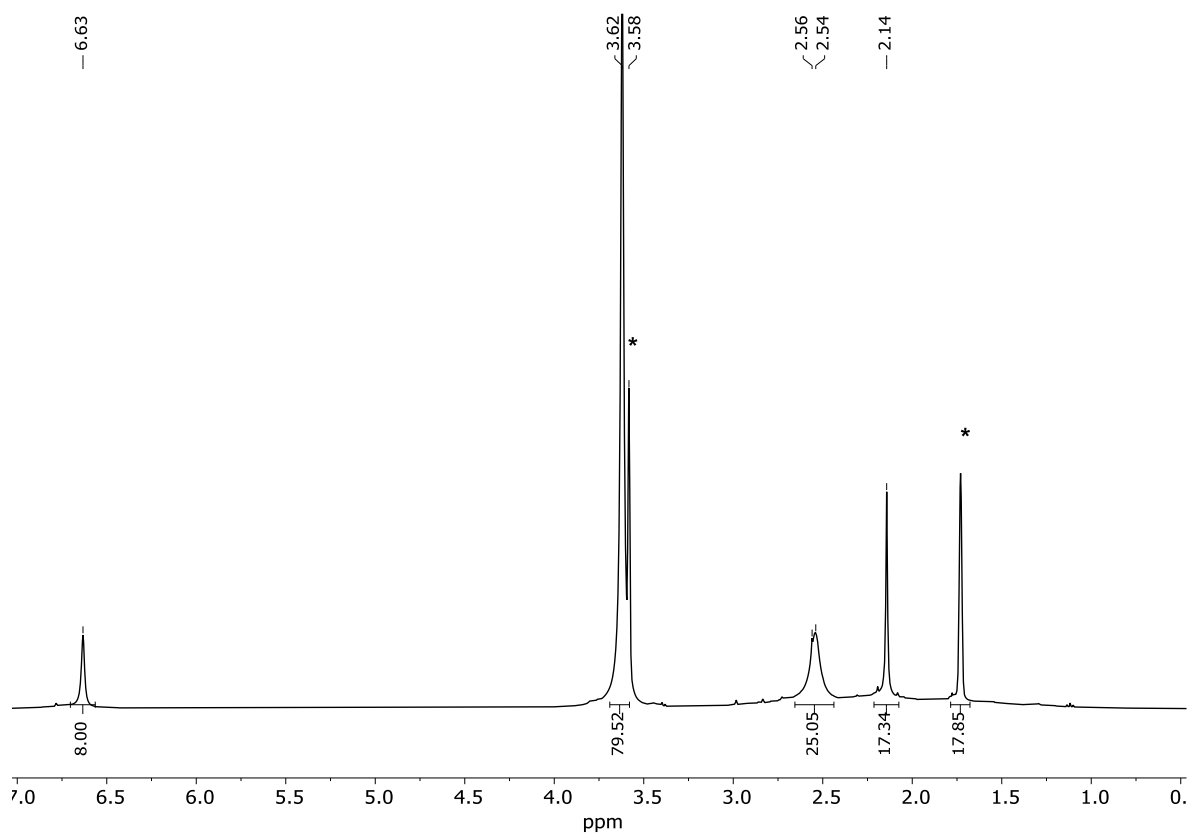

Figure S22: <sup>1</sup>H NMR spectrum of [K(18-c-6)]<sub>2</sub>[rac-9] in THF-d<sub>8</sub>. (\*: THF-d<sub>8</sub>)

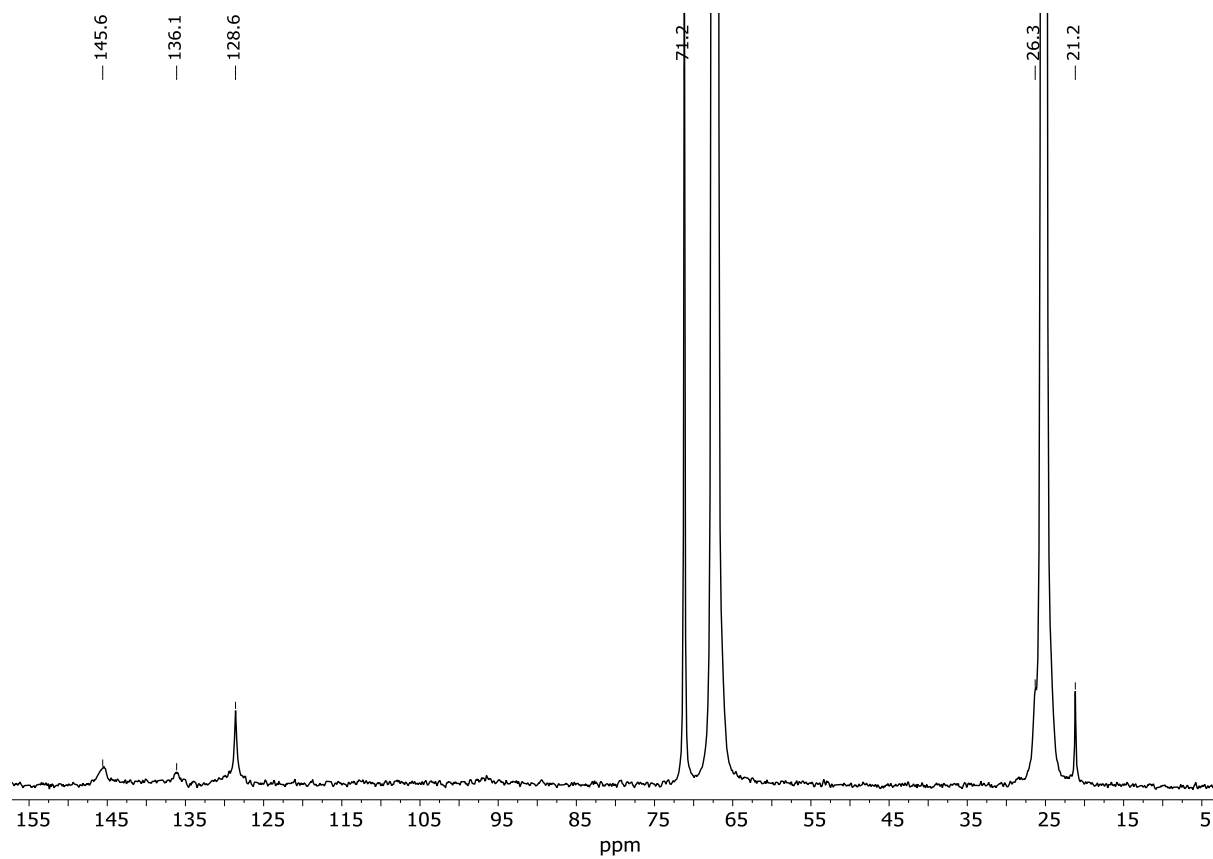

Figure S23: <sup>13</sup>C{<sup>1</sup>H} NMR spectrum of [K(18-c-6)]<sub>2</sub>[rac-9] in THF-d<sub>8</sub>. (\*: THF-d<sub>8</sub>)

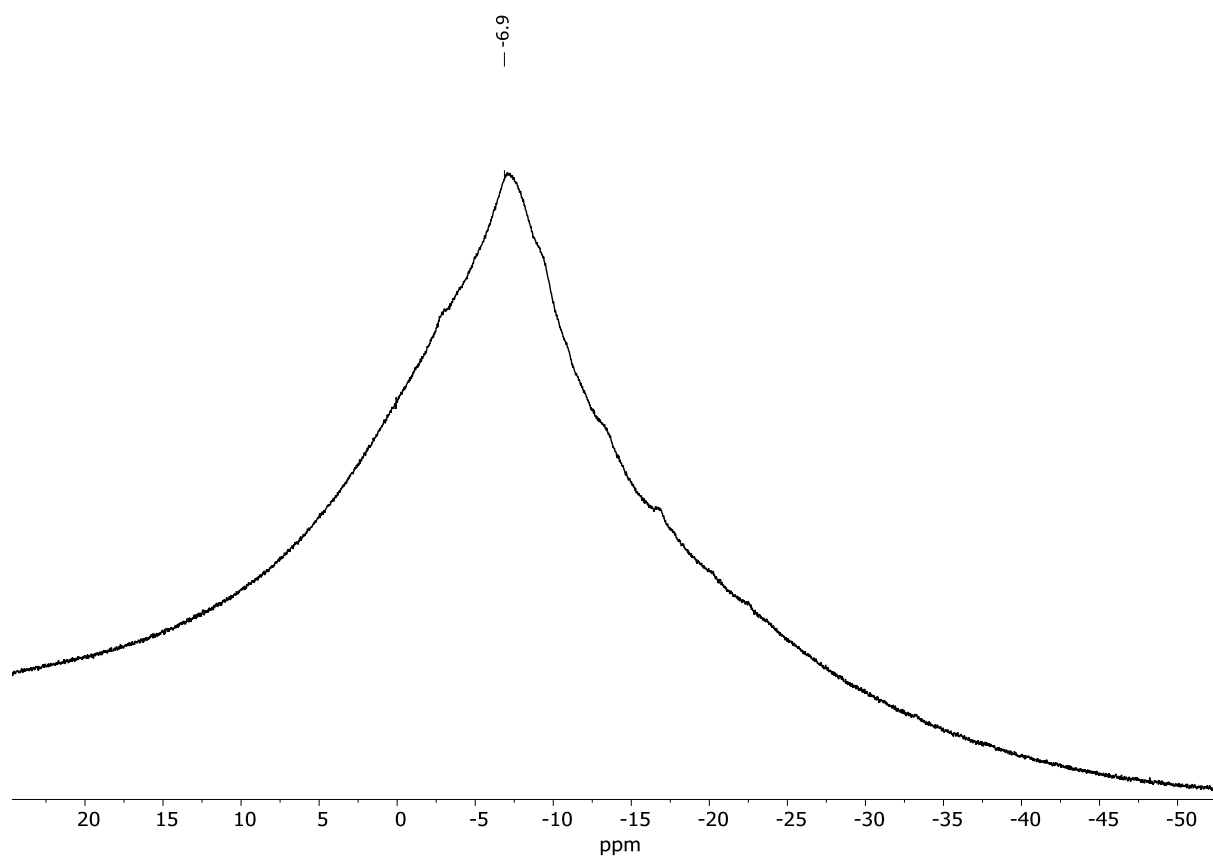

Figure S24:  $^{11}\text{B}\{^1\text{H}\}$  NMR spectrum of  $[\text{K}(18\text{-c-}6)]_2[\text{rac-}9]$  in  $\text{THF-d}_8$ .

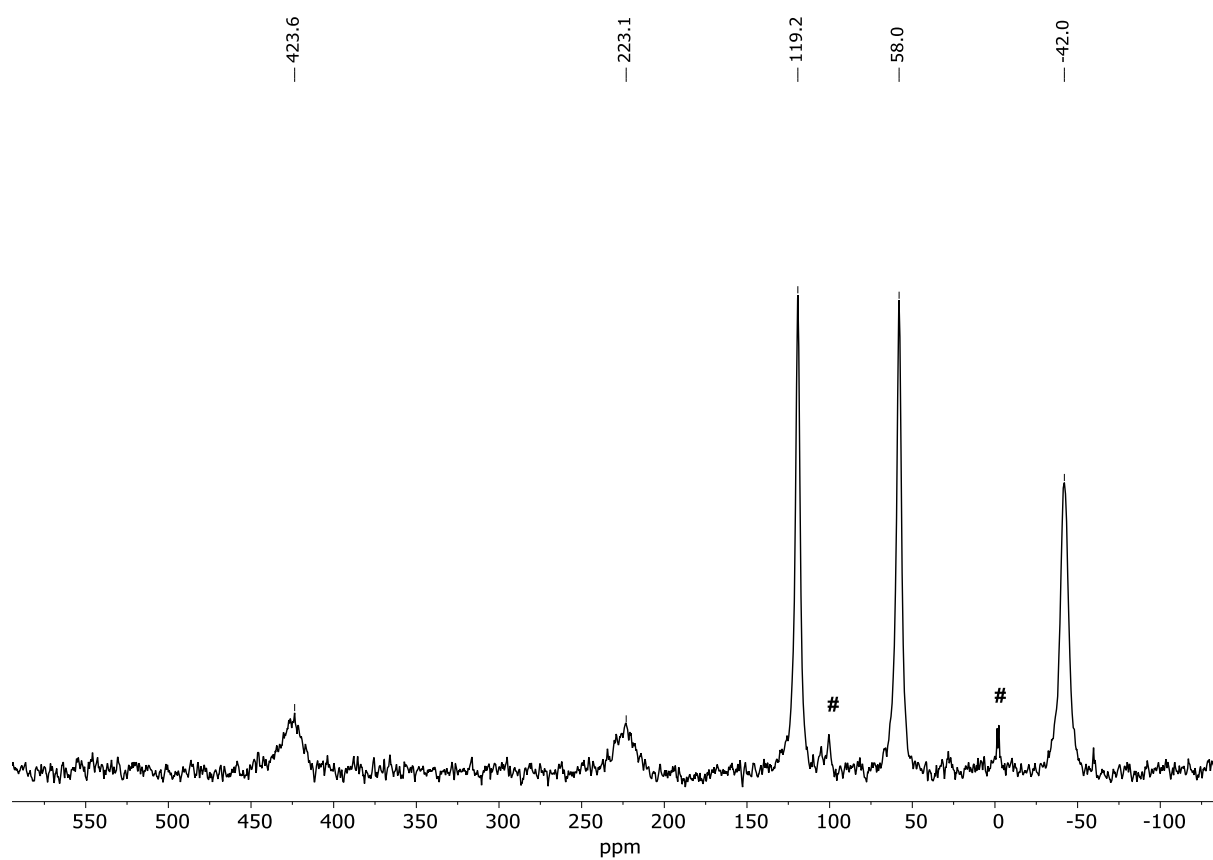

Figure S25:  $^{31}\text{P}\{^1\text{H}\}$  NMR spectrum of  $[\text{K}(18\text{-c-}6)]_2[\text{rac-}9]$  in  $\text{THF-d}_8$ . (#: unidentified impurity).

## 5. NMR spectroscopic monitoring of the reaction between [K(18-c-6)(thf)][rac-1] and P<sub>4</sub>

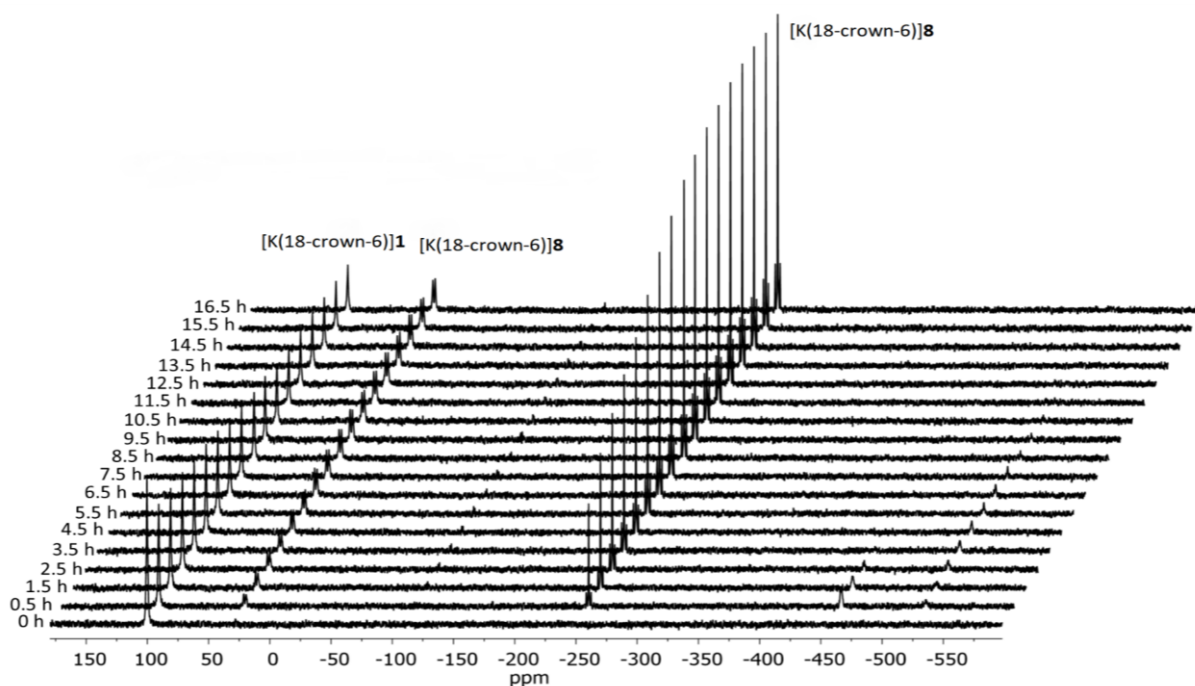

Figure S26: <sup>31</sup>P{<sup>1</sup>H} NMR spectroscopic monitoring of the reaction between [K(18-c-6)(thf)][rac-1] and P<sub>4</sub> (THF-d<sub>8</sub>). Stack angle = 15°.

## 6. NMR spectroscopic monitoring of the reaction between [K(18-c-6)][rac-1] and [K(18-c-6)][meso-8]

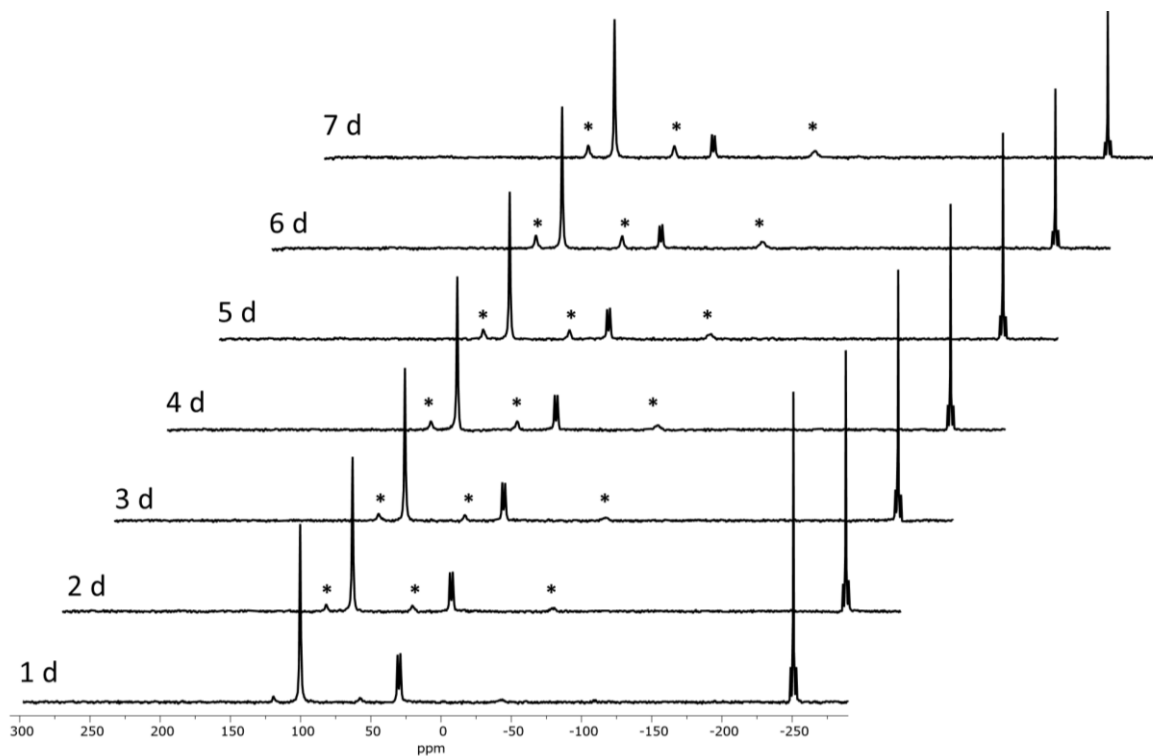

Figure S27: <sup>31</sup>P{<sup>1</sup>H} NMR spectroscopic monitoring of the reaction between [K(18-c-6)(thf)][rac-1] and [K(18-c-6)][meso-8] in THF-d<sub>8</sub>. A star (\*) denotes signals corresponding to [K(18-c-6)]<sub>2</sub>[rac-9]. Stack angle = 30°.

## 7. Variable temperature NMR spectroscopic measurements on [K(18-c-6)][rac-7]

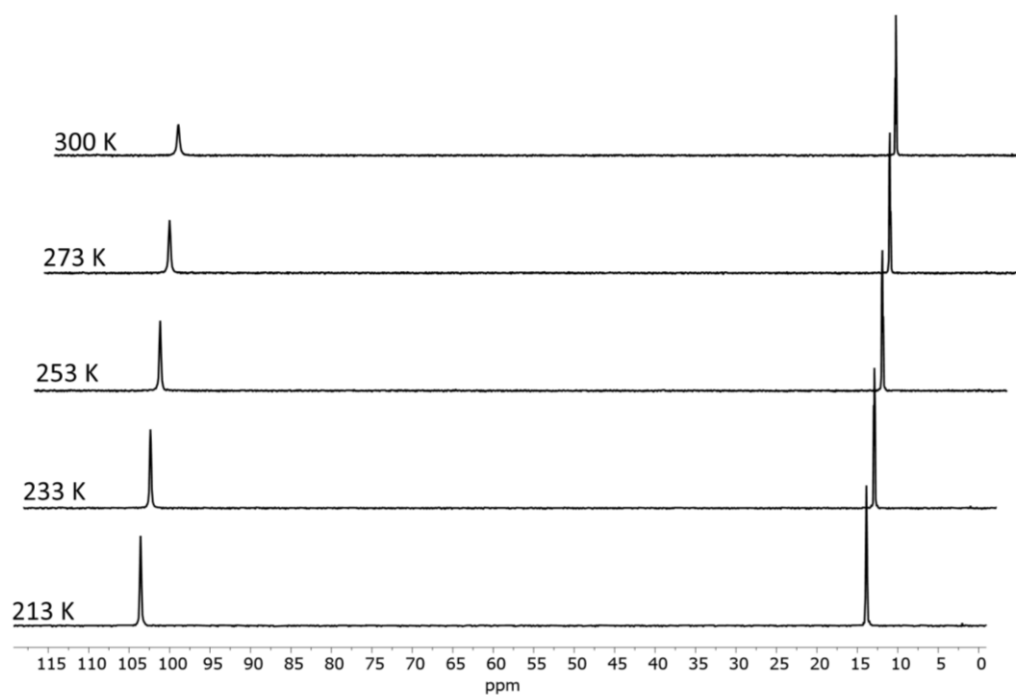

Figure S28: Variable temperature NMR spectra of [K(18-c-6)][rac-7] ( $^{31}\text{P}\{^1\text{H}\}$ , THF- $d_8$ ). Stack angle =  $5^\circ$ .

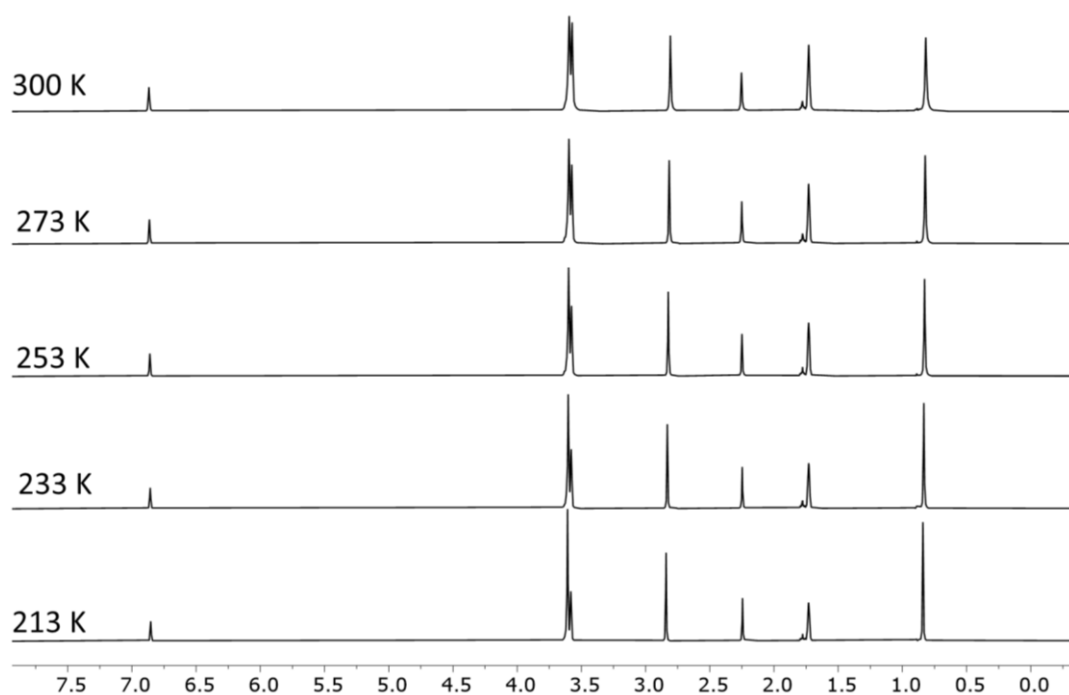

Figure S29: Variable temperature NMR spectra of [K(18-c-6)][rac-7] ( $^1\text{H}$ , THF- $d_8$ ). Stack angle =  $0^\circ$ .

## 8. Variable temperature NMR spectroscopic measurements on [K(18-c-6)<sub>2</sub>][rac-9]

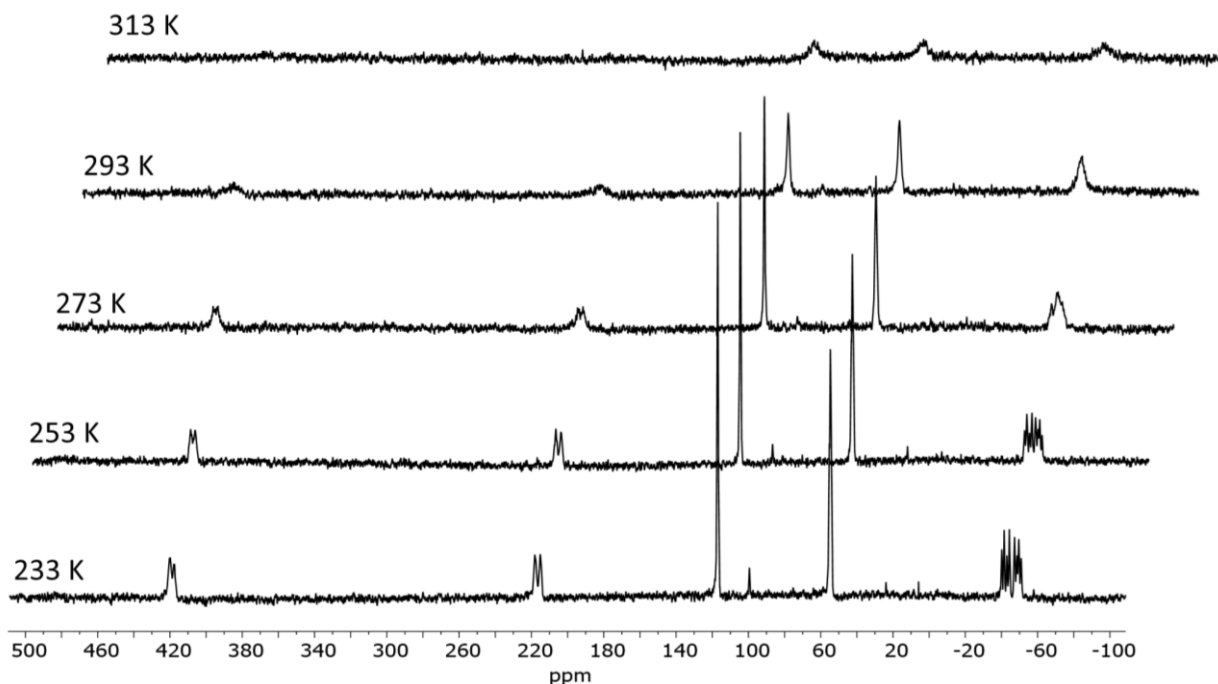

**Figure S30:** Variable temperature NMR spectra of [K(18-c-6)<sub>2</sub>][rac-9] (<sup>31</sup>P{<sup>1</sup>H}, THF-d<sub>8</sub>). Stack angle = 15°.

Table 1: Calculated <sup>31</sup>P NMR shifts of [rac-9]<sup>2-</sup> with various basis sets (BS = broken-symmetry). Atom labels refer to Figure 4 in the main text. The calculated shifts were referenced internally against P2.

|    | Exp.  | def2-SVP<br>S = 0, BS | def2-SVP<br>S = 0 | def2-TZVP<br>S = 0, BS | def2-TZVP<br>S = 0 | pcSseg-2<br>S = 0, BS | pcSseg-2<br>S = 0 |
|----|-------|-----------------------|-------------------|------------------------|--------------------|-----------------------|-------------------|
| P4 | -49.1 | -5                    | -32               | -28                    | -54                | 4                     | -53               |
| P5 | -42.3 | 7                     | 21                | -16                    | -2                 | 13                    | -2                |
| P1 | 55.2  | 49/49                 | 64/64             | 50/51                  | 59/59              | 47/48                 | 59/59             |
| P2 | 116.9 | 117/116               | 117/116           | 117/115                | 117/116            | 117/117               | 117/117           |
| P6 | 216.5 | 302                   | 268               | 215                    | 258                | 281                   | 254               |
| P3 | 418.8 | 527                   | 209               | 433                    | 218                | 492                   | 213               |

Figure S30 shows the variable temperature <sup>31</sup>P{<sup>1</sup>H} NMR spectra of [K(18-c-6)<sub>2</sub>][rac-9]. In addition, Table 1 shows the calculated <sup>31</sup>P NMR shifts of the dianion [rac-9]<sup>2-</sup> (TPSS0 functional, basis sets are given in Table 1). Clearly, a reasonable agreement between measured and calculated shifts is only reached when a broken-symmetry wavefunction is used. This is particularly visible when comparing the calculated shifts of P3.

## 9. Cyclic voltammetry measurements

Cyclic voltammograms (CV) were recorded with a CH Instruments potentiometer and software from CH Instruments. CV was measured with an electrode cell equipped with a Pt-working electrode, Pt-counter electrode and an Ag/AgNO<sub>3</sub>-reference electrode. The Ag/AgNO<sub>3</sub> reference electrode was referenced against ferrocene in tetrahydrofuran. The analytes and the conducting salt [nBu<sub>4</sub>N]PF<sub>6</sub> (2 mmol) were dissolved in tetrahydrofuran (10mL) for the CV measurements.

[K(18-c-6)(thf)][rac-1]

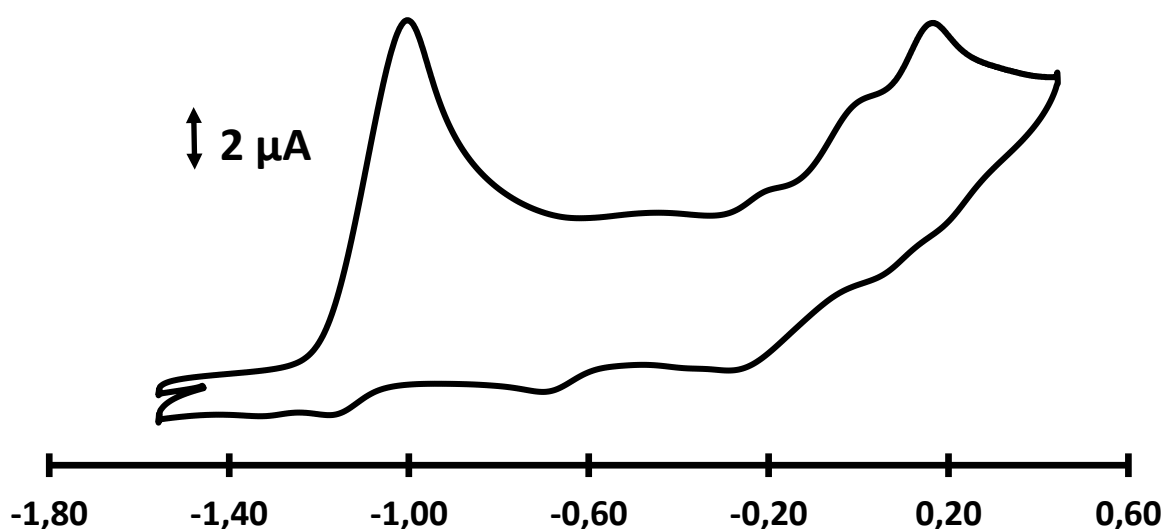

Figure S31: Cyclic voltammogram of [K(18-c-6)(thf)][rac-1], scan rate 200mV, range from E(V)=-1.8 to +0.6, E vs. FcH/FcH<sup>+</sup>.

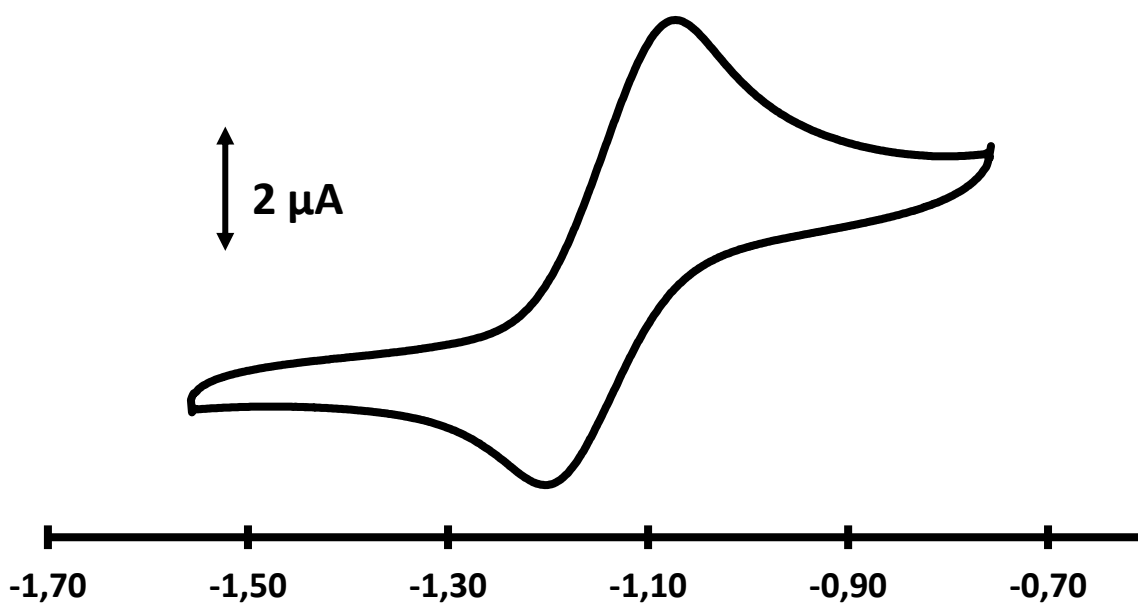

Figure S32: Cyclic voltammogram of [K(18-c-6)(thf)][rac-1], scan rate 200mV, range from E(V)=-1.7 to -0.8, E vs. FcH/FcH<sup>+</sup>.

[K(18-c-6)(dme)][rac-6]

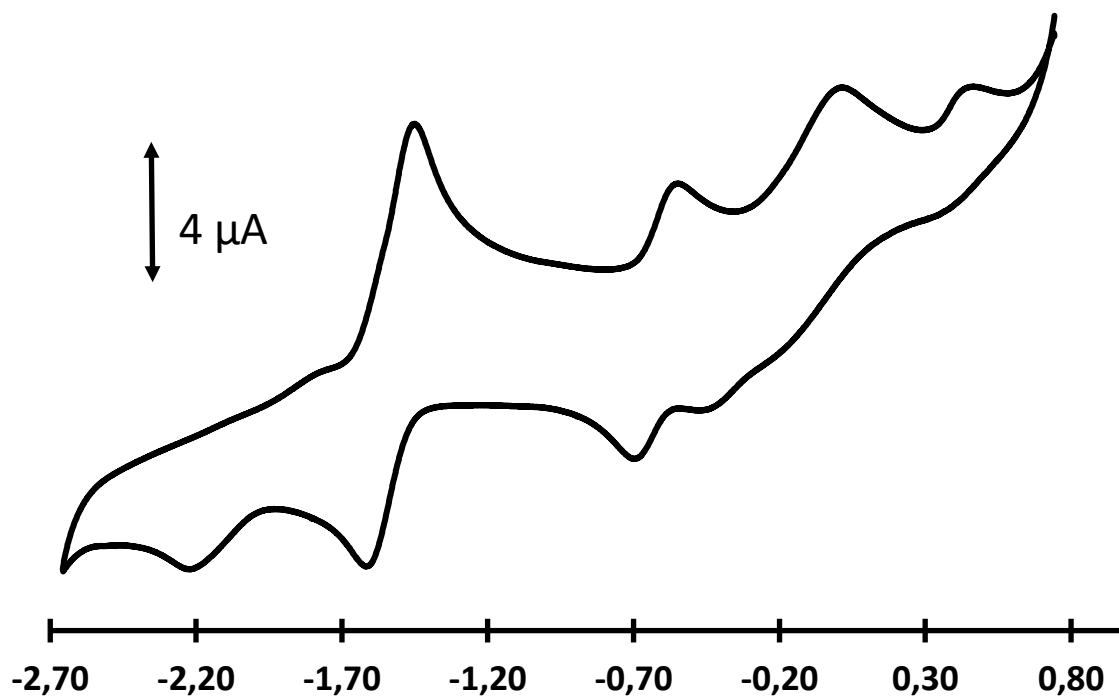

Figure S33: Cyclic voltammogram of  $[K(18-c-6)(dme)][rac-6]$ , scan rate 200mV, range from  $E(V)=-2.7$  to  $+0.8$ , E vs.  $FcH/FcH^+$ .

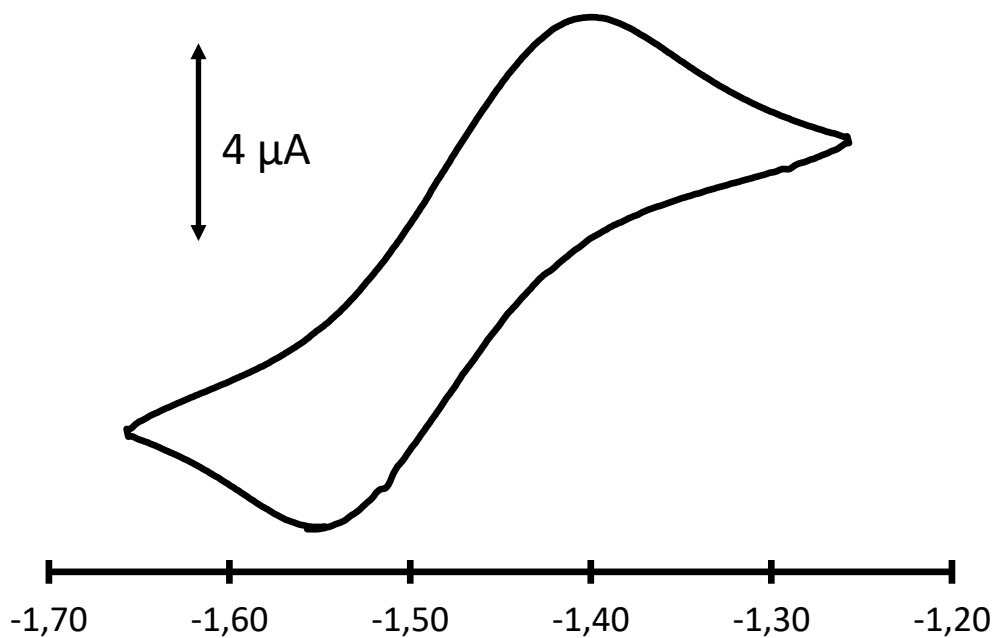

Figure S34: Cyclic voltammogram of  $[K(18-c-6)(dme)][rac-6]$ , scan rate 200mV, range from  $E(V)=-1.7$  to  $-1.2$ , E vs.  $FcH/FcH^+$ .

$[K(18-c-6)][rac-7]$



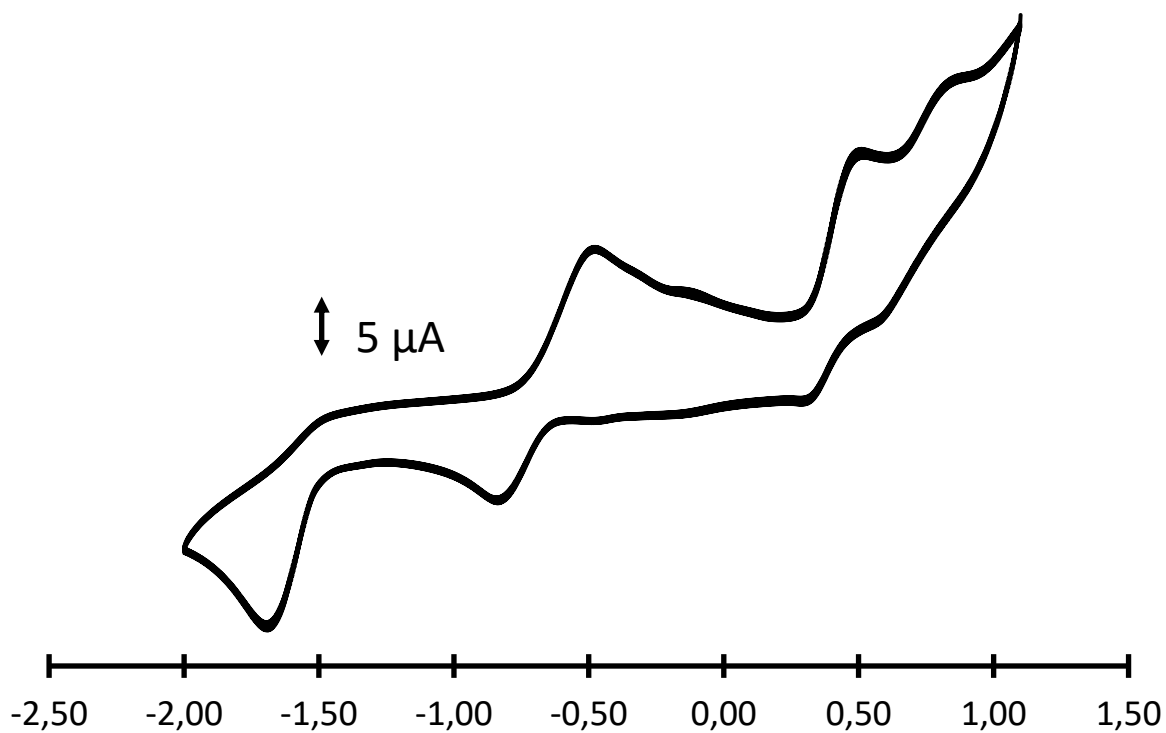

Figure S35: Cyclic voltammogram of [K(18-c-6)]rac-7, scan rate 200mV, range from E(V)=-2.5 to +1.0, E vs. FcH/FcH<sup>+</sup>.

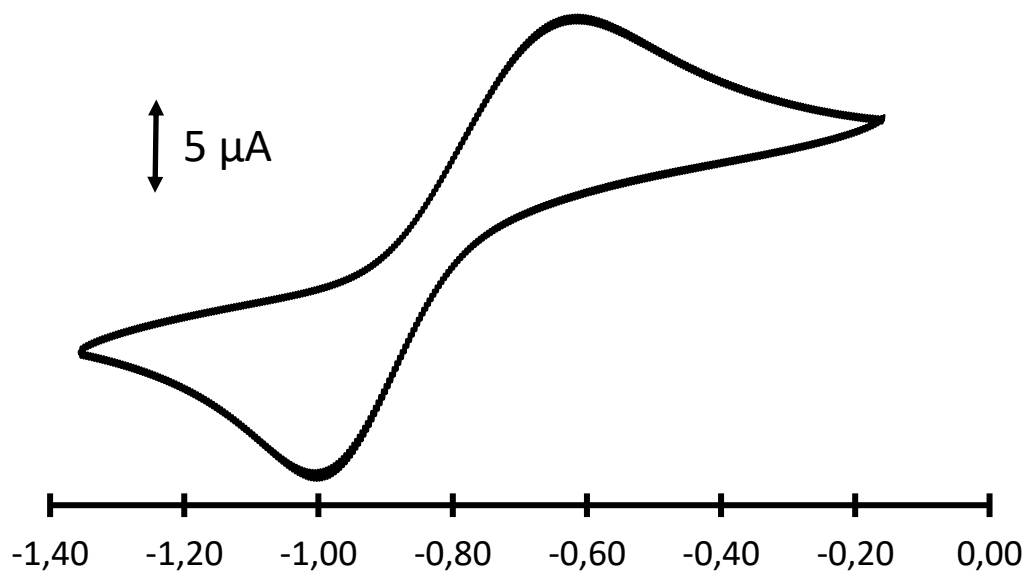

Figure S36: Cyclic voltammogram of [K(18-c-6)]rac-7, scan rate 200mV, range from E(V)=-1.4 to 0.0, E vs. FcH/FcH<sup>+</sup>.

[K(18-c-6)]meso-8]

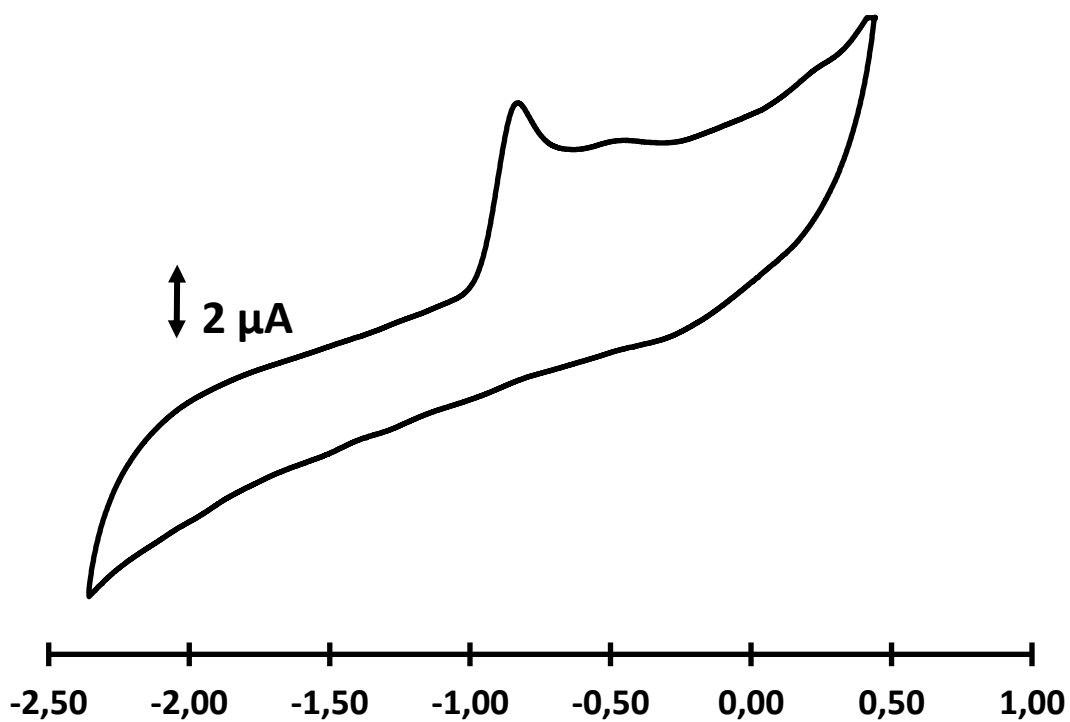

Figure S37: Cyclic voltammogram of  $[K(18-c-6)]_2[meso-8]$ , scan rate 200mV, range from  $E(V)=-2.5$  to  $+1.0$ , E vs.  $FcH/FcH^+$ .

$[K(18-c-6)]_2[rac-9]$

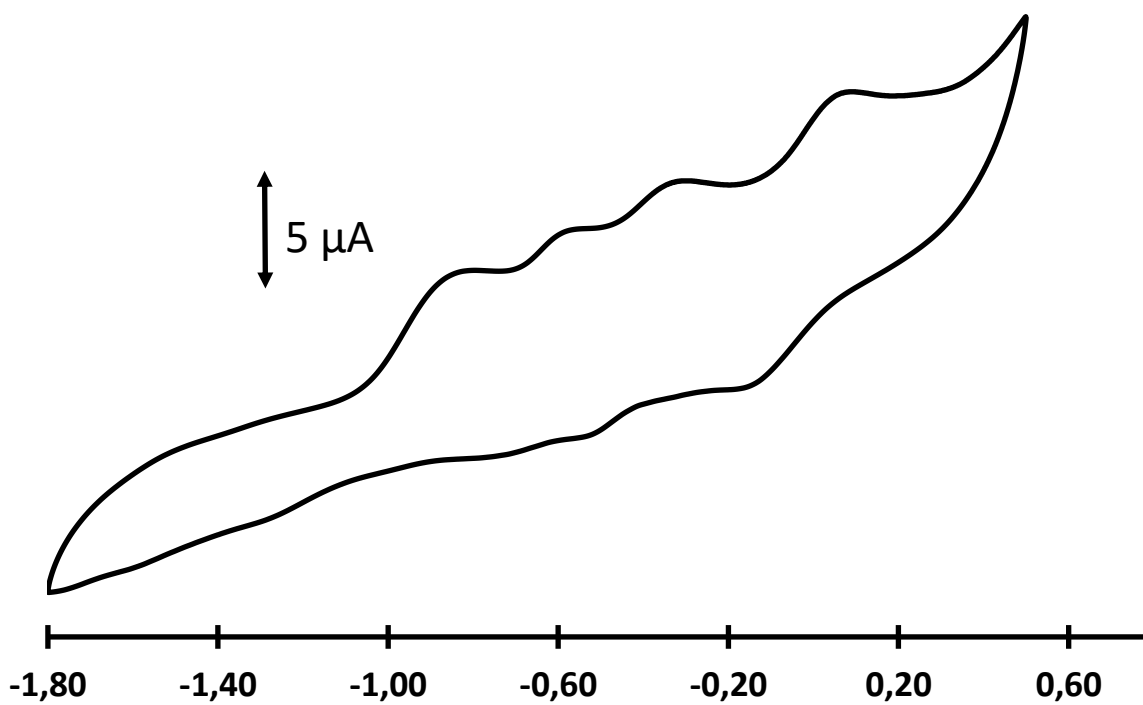

Figure S38: Cyclic voltammogram of  $[K(18-c-6)]_2[rac-9]$ , scan rate 200mV, range from  $E(V)=-1.8$  to  $+0.6$ , E vs.  $FcH/FcH^+$ .

## 10. UV-vis spectra and TDDFT results

The following section contains the measured and calculated UV-vis spectra of all complexes. The calculated spectra are in reasonable agreement with the experimental spectra and show the typical blue-shift when using range-separated hybrid functionals. In addition, the difference densities of selected transitions are given to identify the nature of the observed maxima. For  $\mathbf{9}^{2-}$ , spectra were calculated using a standard closed-shell wavefunction and a broken-symmetry wavefunction. However, the differences between both spectra are negligible, indicating that the antiferromagnetic coupling between the cobalt atoms in  $[\text{rac-}\mathbf{9}]^{2-}$  does not influence the transition energies significantly.

[K(18-c-6)(thf)][rac-1]

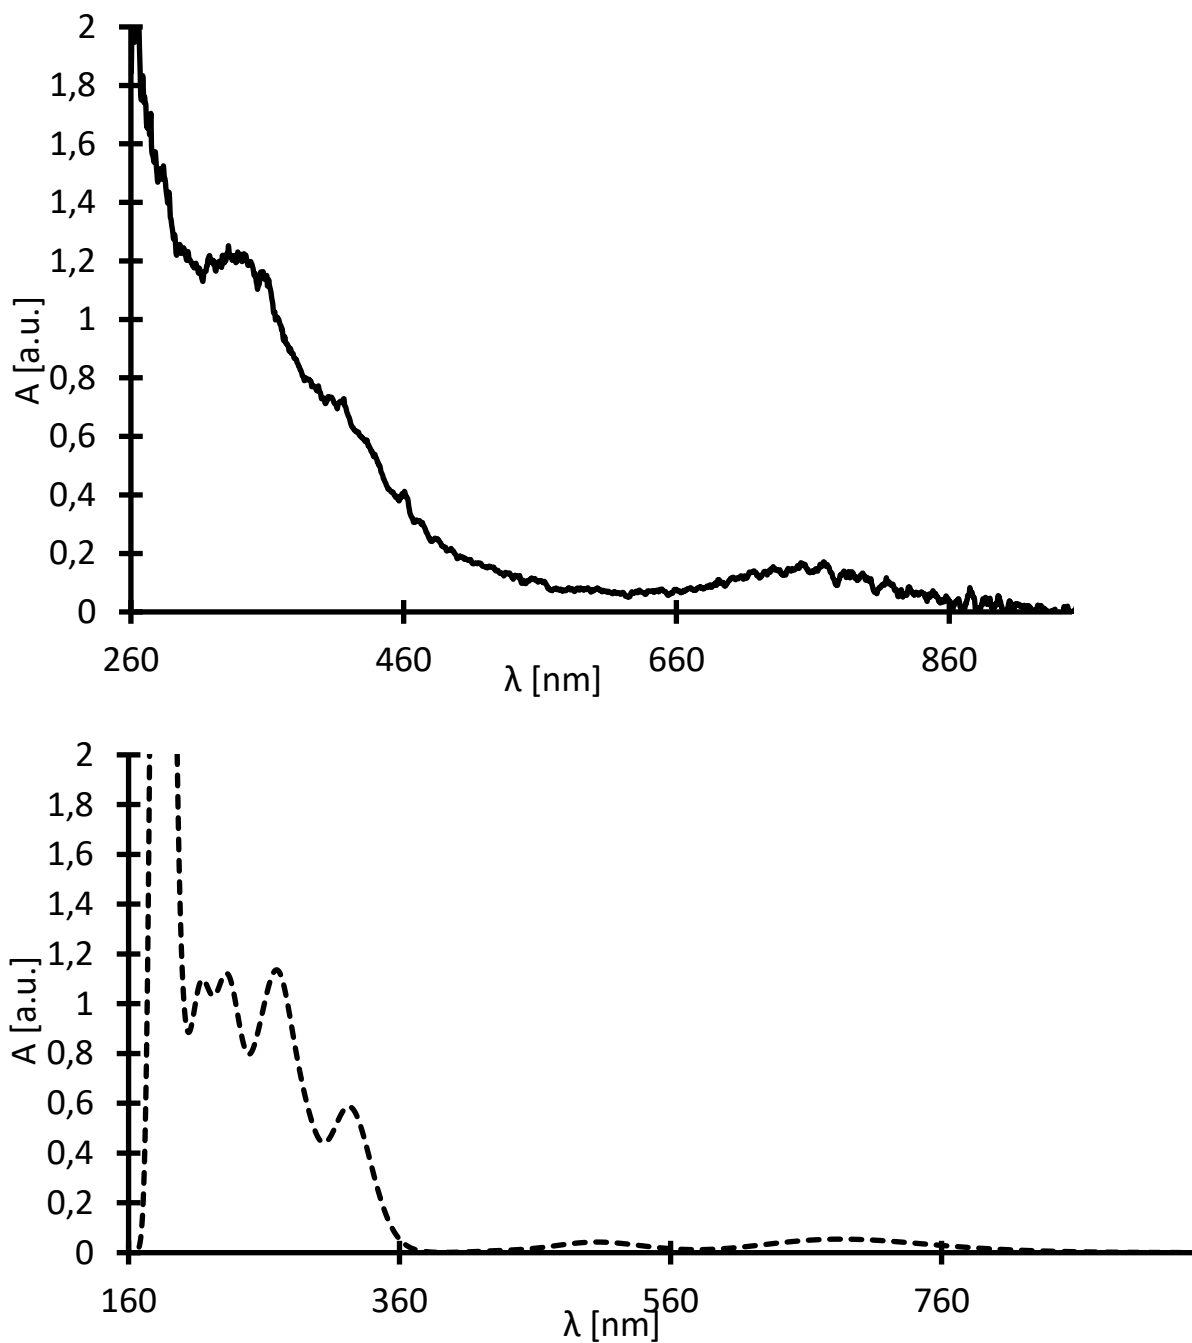

Figure S39: UV-vis spectrum of [K(18-c-6)(thf)][rac-1] in THF (line: experimental data, dotted: calculated spectrum).

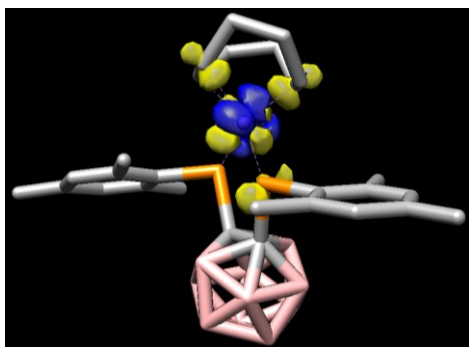

2 (683 nm,  $f_{osc} = 0.012$ )

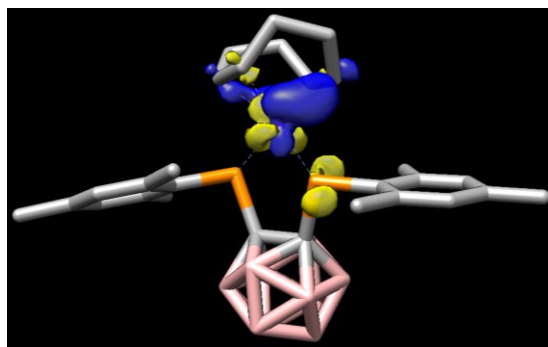

3 (506 nm,  $f_{osc} = 0.011$ )

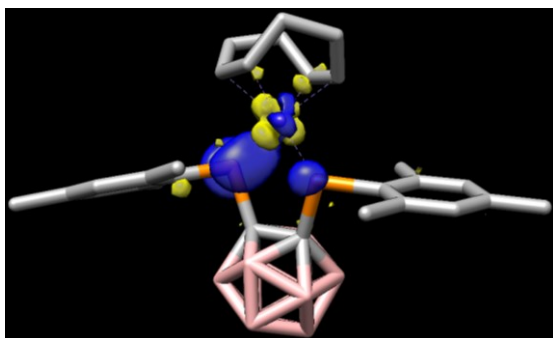

6 (332 nm,  $f_{osc} = 0.056$ )

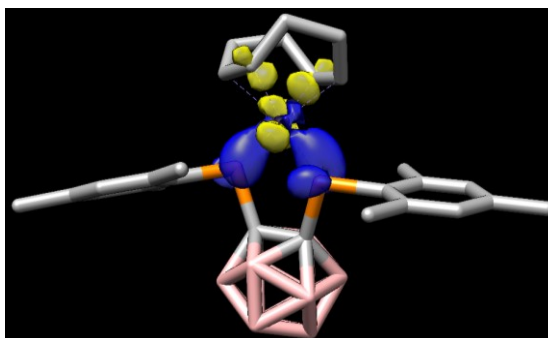

7 (320 nm,  $f_{osc} = 0.091$ )

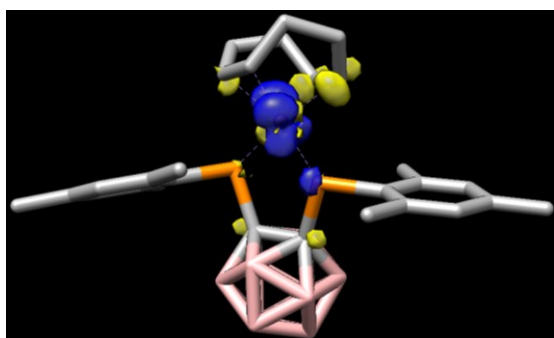

12 (270 nm,  $f_{osc} = 0.140$ )

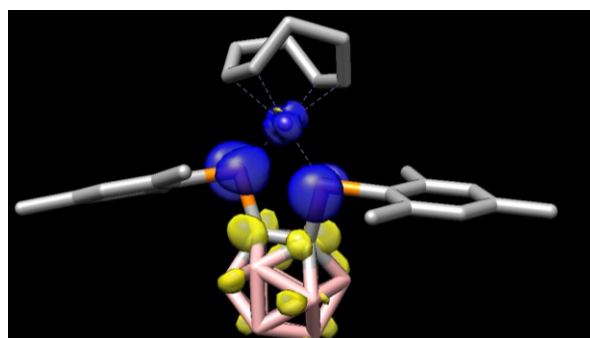

13 (274 nm,  $f_{osc} = 0.075$ )

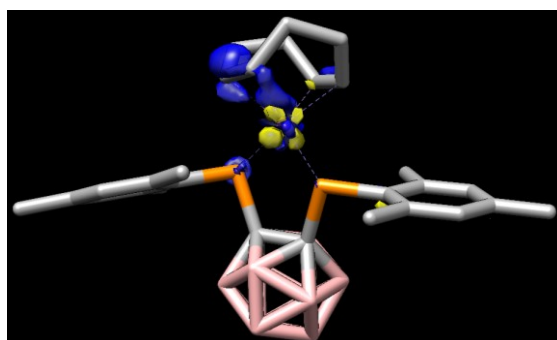

25 (233 nm,  $f_{osc} = 0.054$ )

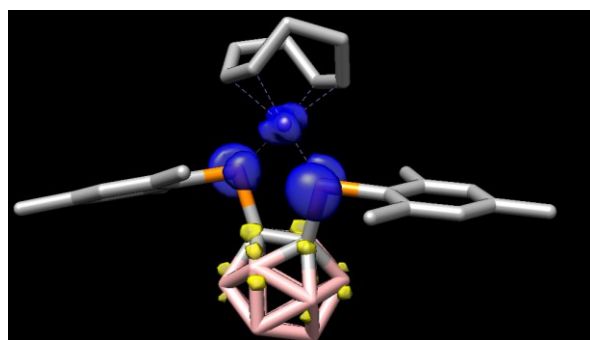

28 (230 nm,  $f_{osc} = 0.095$ )

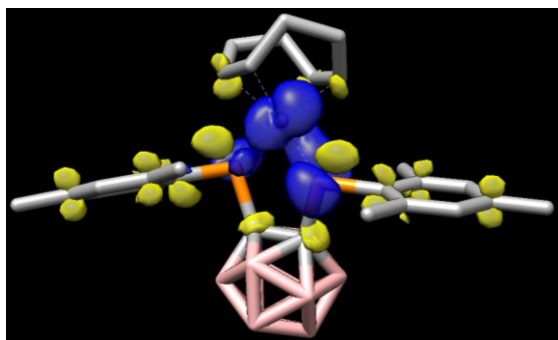

30 (223 nm,  $f_{osc} = 0.032$ )

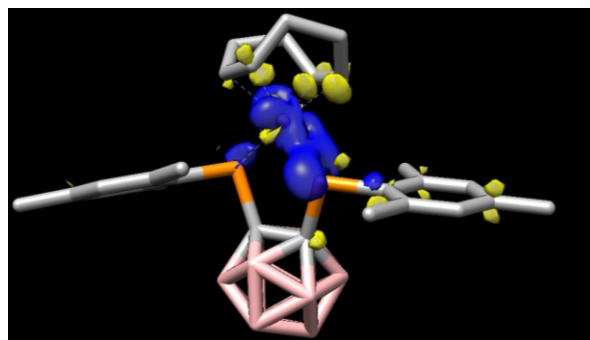

35 (214 nm,  $f_{osc} = 0.033$ )

Figure S40: Difference densities of calculated excited states of  $[rac-1]^-$  (transitions proceed from blue to yellow). The calculated wavelength of the absorption and the oscillator strength are given in parentheses.

***rac-2***

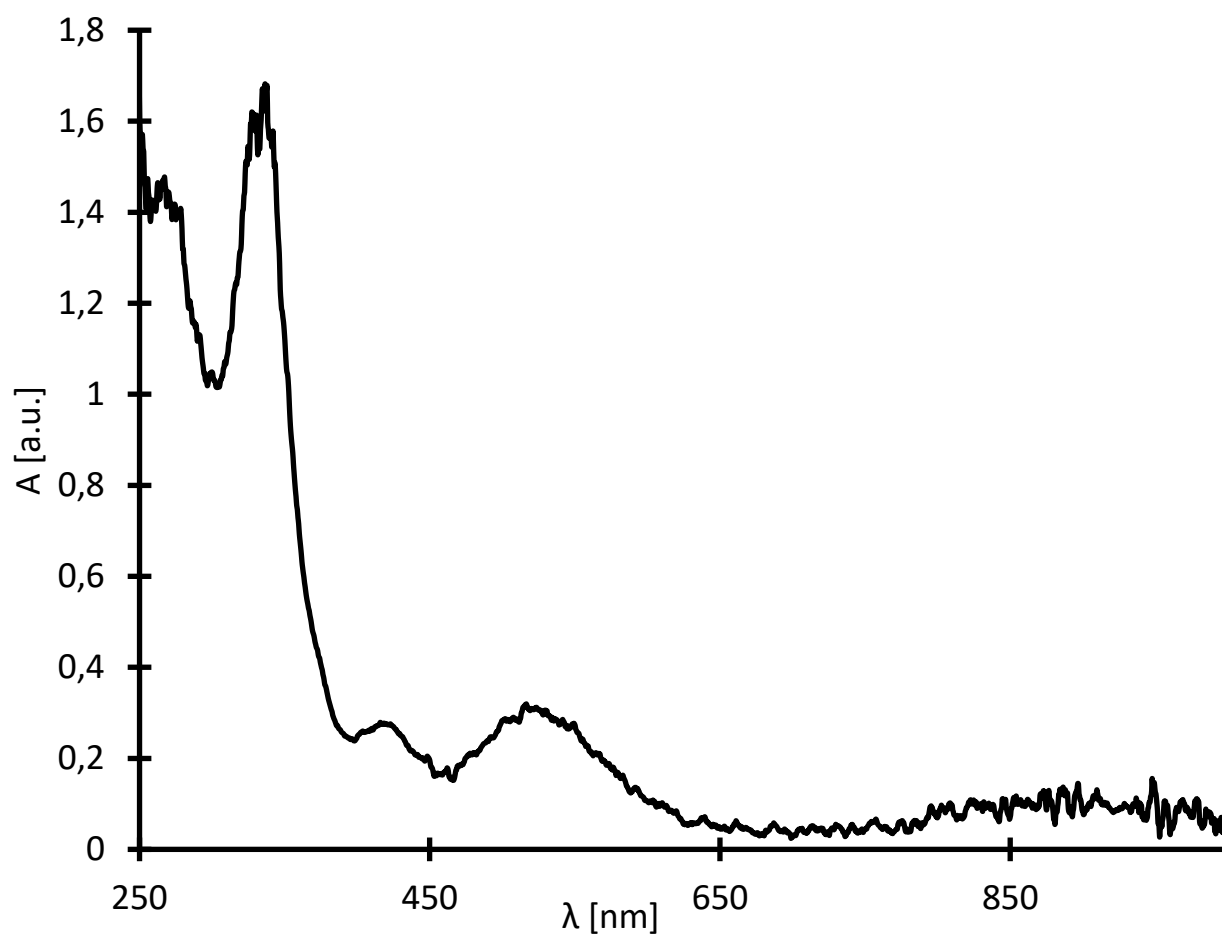

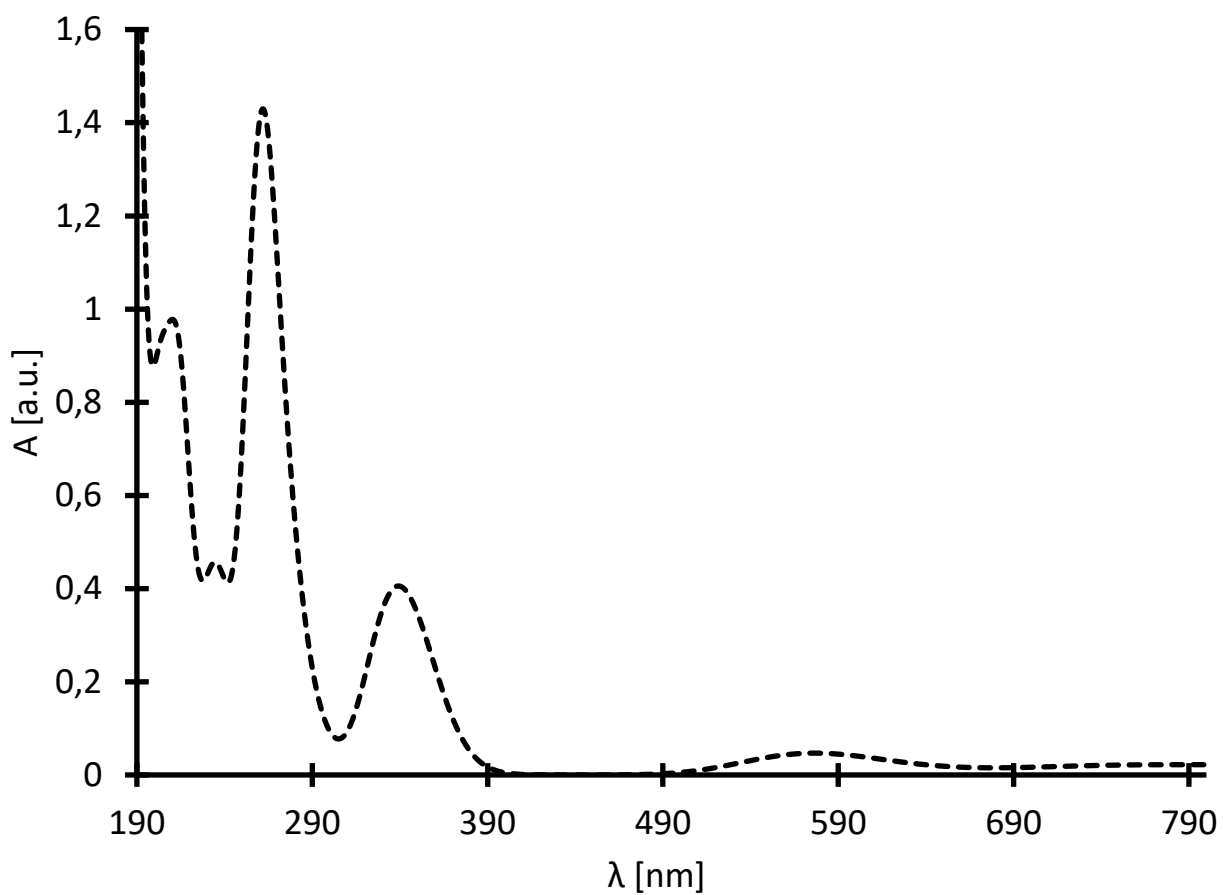

Figure S41: UV-vis spectrum of *rac-2* in THF (line: experimental data, dotted: calculated spectrum).

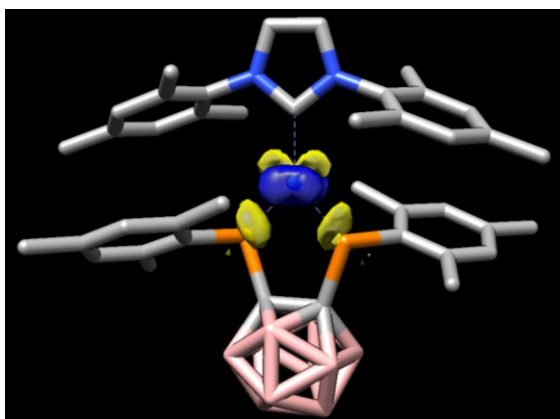

2 (771 nm,  $f_{osc} = 0.004$ )

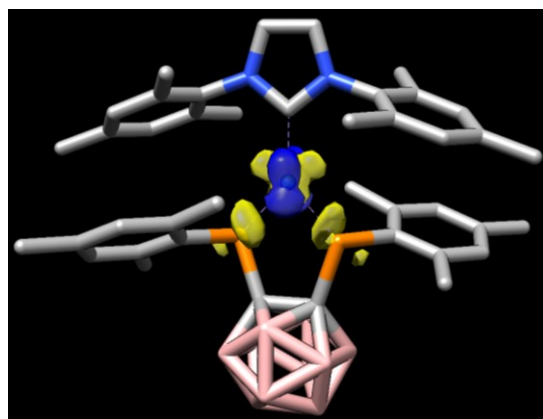

3 (741 nm,  $f_{osc} = 0.002$ )

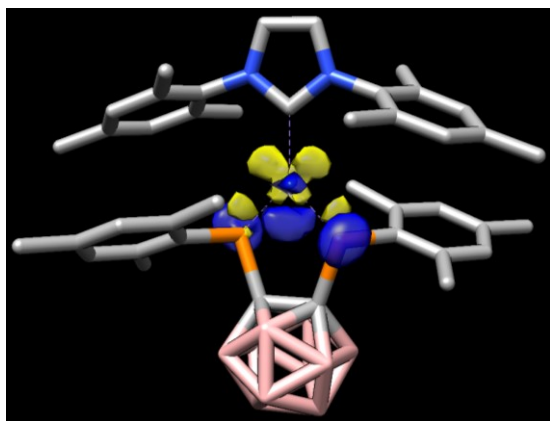

5 (350 nm,  $f_{osc} = 0.064$ )

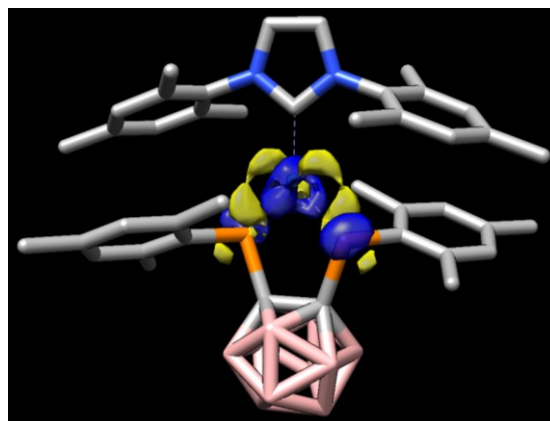

6 (332 nm,  $f_{osc} = 0.083$ )

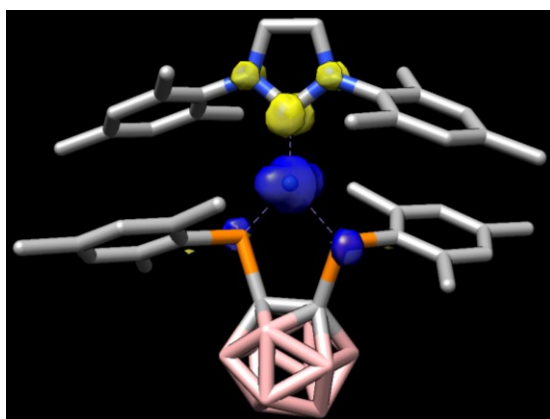

11 (263 nm,  $f_{osc} = 0.232$ )

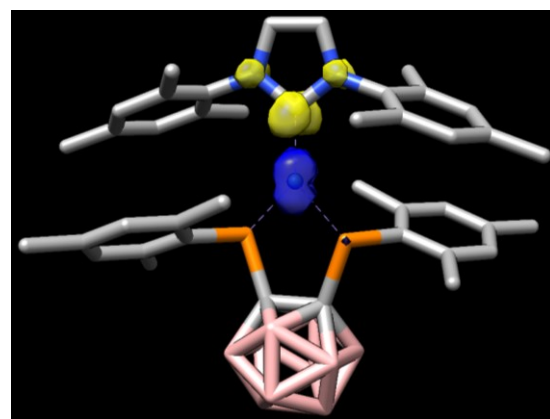

12 (258 nm,  $f_{osc} = 0.161$ )

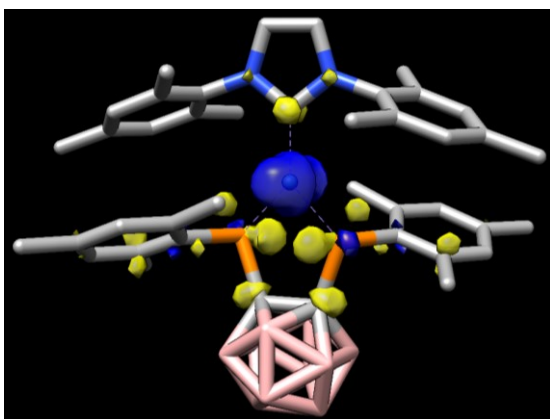

36 (213 nm,  $f_{osc} = 0.114$ )

Figure S42: Difference densities of calculated excited states of *rac-2* (transitions proceed from blue to yellow). The calculated wavelength of the absorption and the oscillator strength are given in parentheses.

[K(18-c-6)(dme)][rac-6]

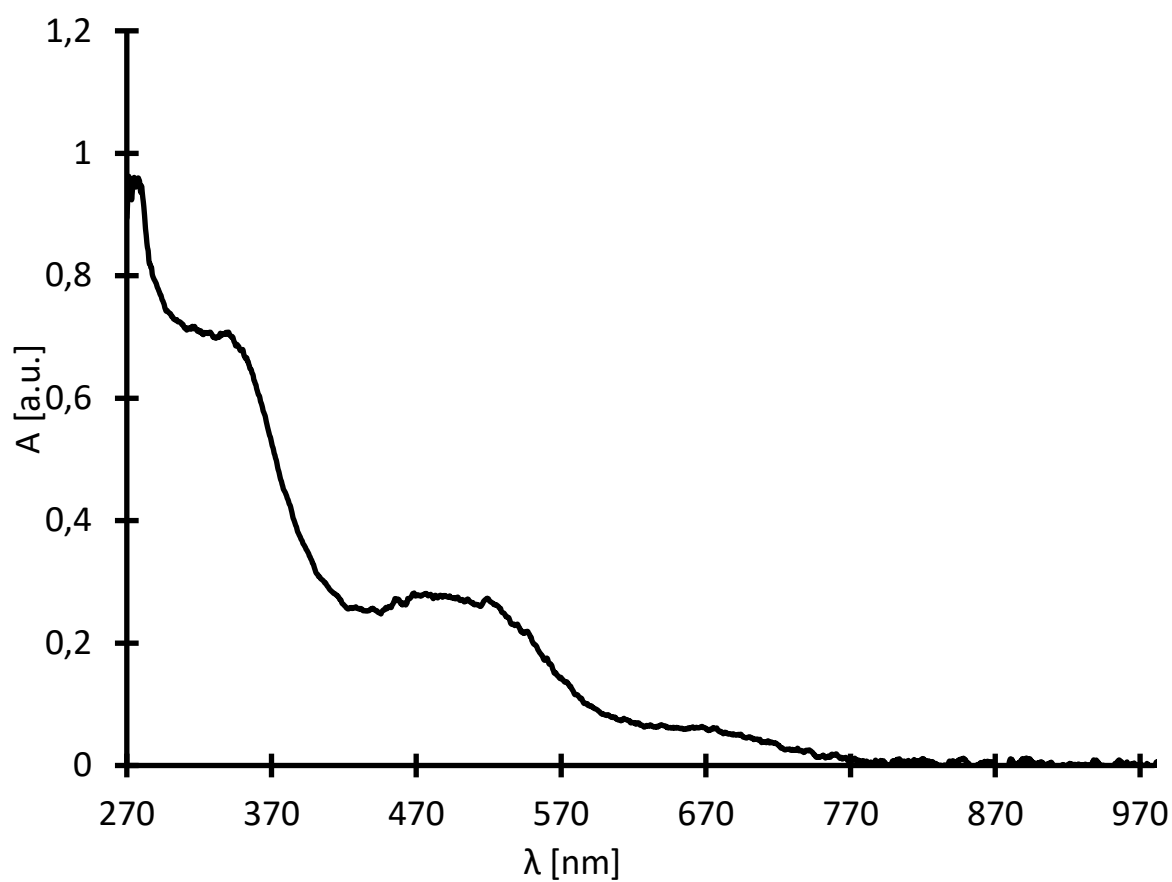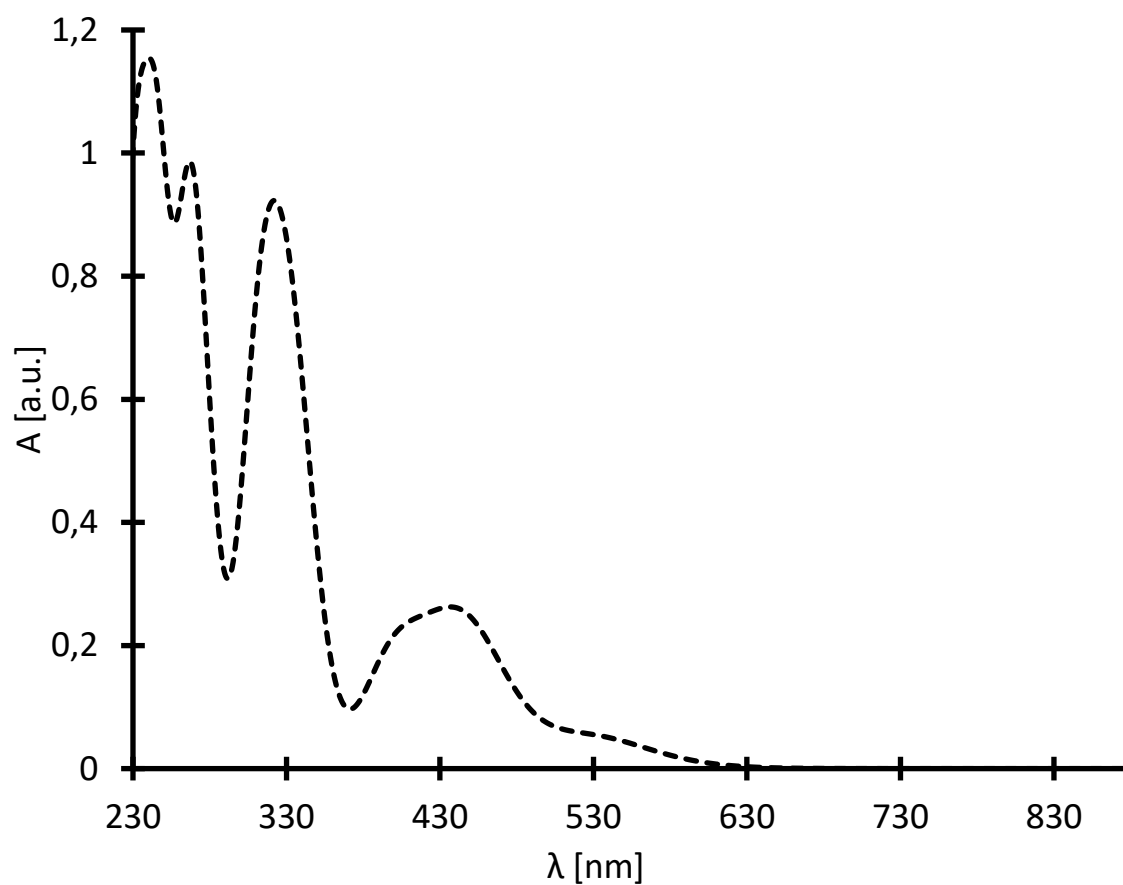

Figure S43: UV-vis spectrum of [K(18-c-6)(dme)][rac-6] in THF (line: experimental data, dotted: calculated spectrum).



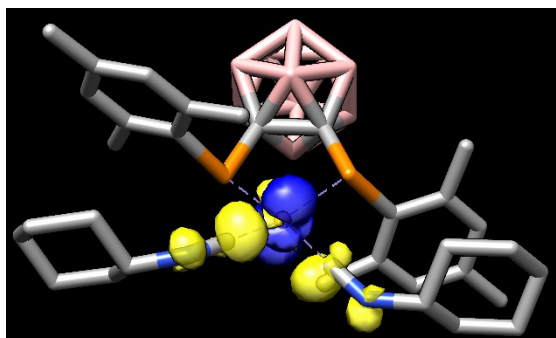

1 (529 nm,  $f_{osc} = 0.009$ )

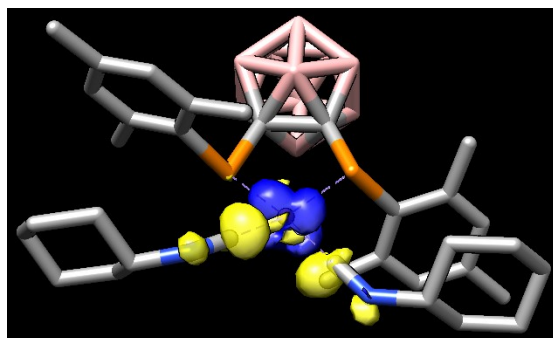

2 (447 nm,  $f_{osc} = 0.039$ )

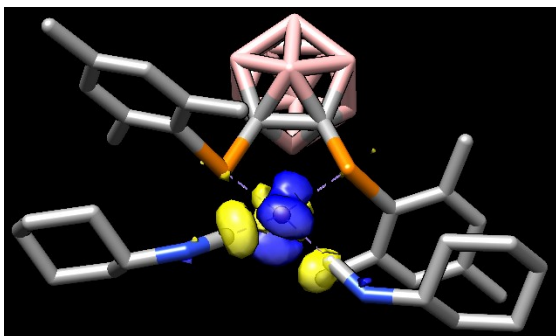

3 (403 nm,  $f_{osc} = 0.030$ )

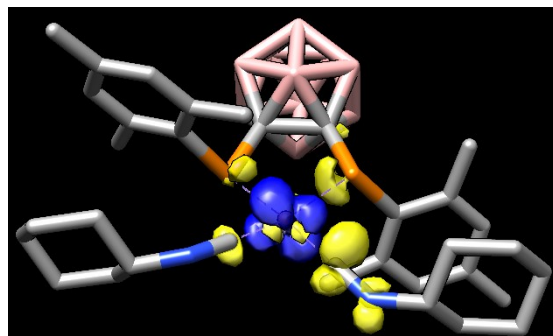

7 (334 nm,  $f_{osc} = 0.084$ )

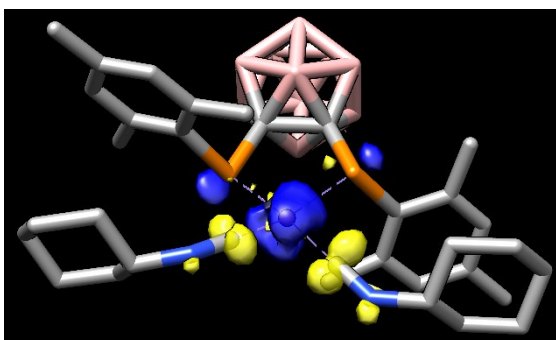

9 (314 nm,  $f_{osc} = 0.081$ )

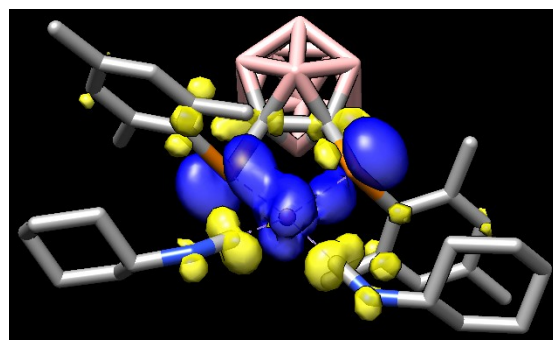

19 (267nm,  $f_{osc} = 0.071$ )

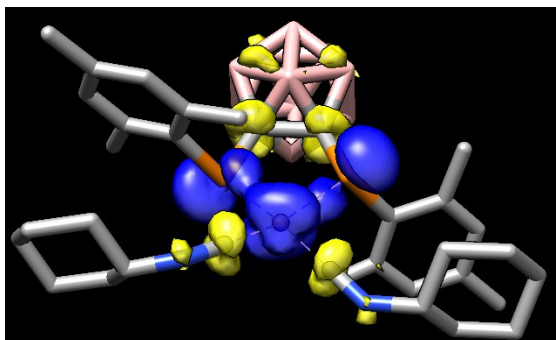

26 (243nm,  $f_{osc} = 0.057$ )

Figure S44: Difference densities of calculated excited states of  $[rac-6]^-$  (transitions proceed from blue to yellow). The calculated wavelength of the absorption and the oscillator strength are given in parentheses.

[K(18-c-6)][rac-7]

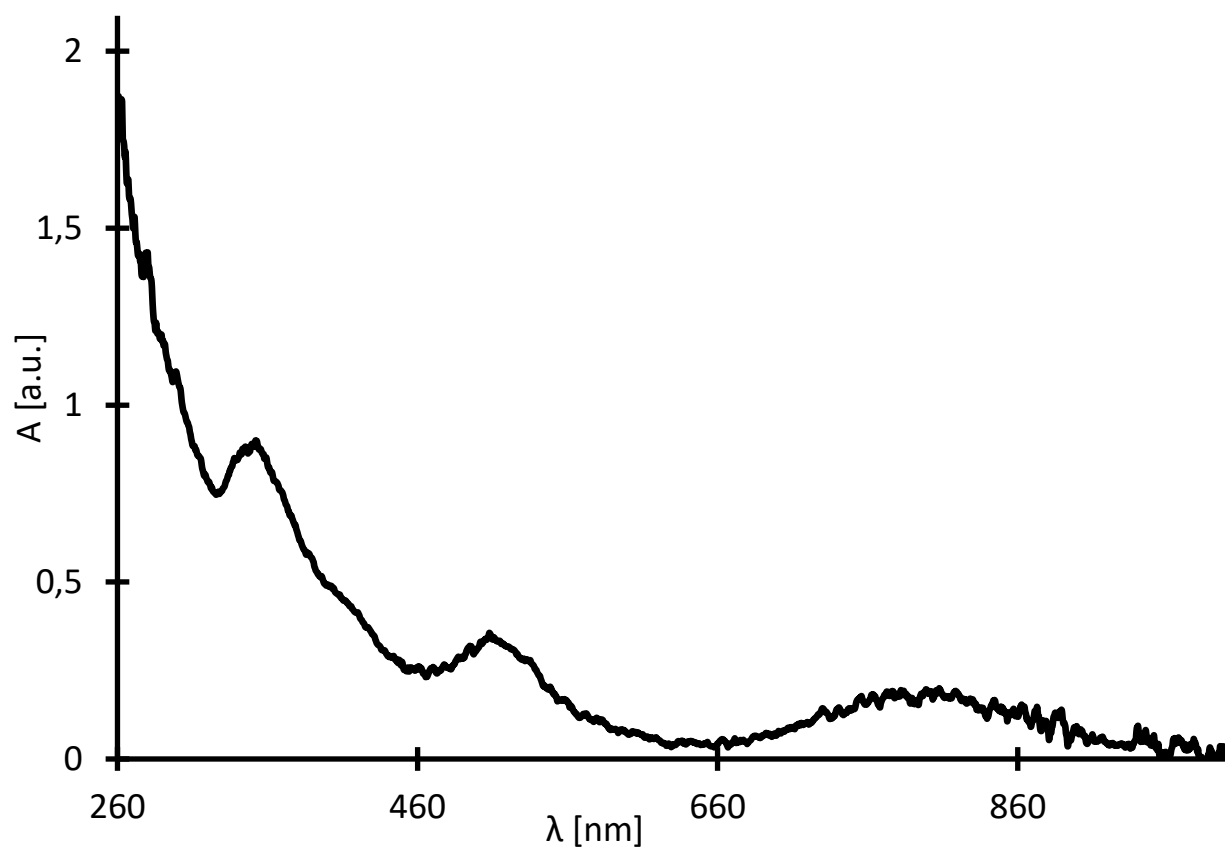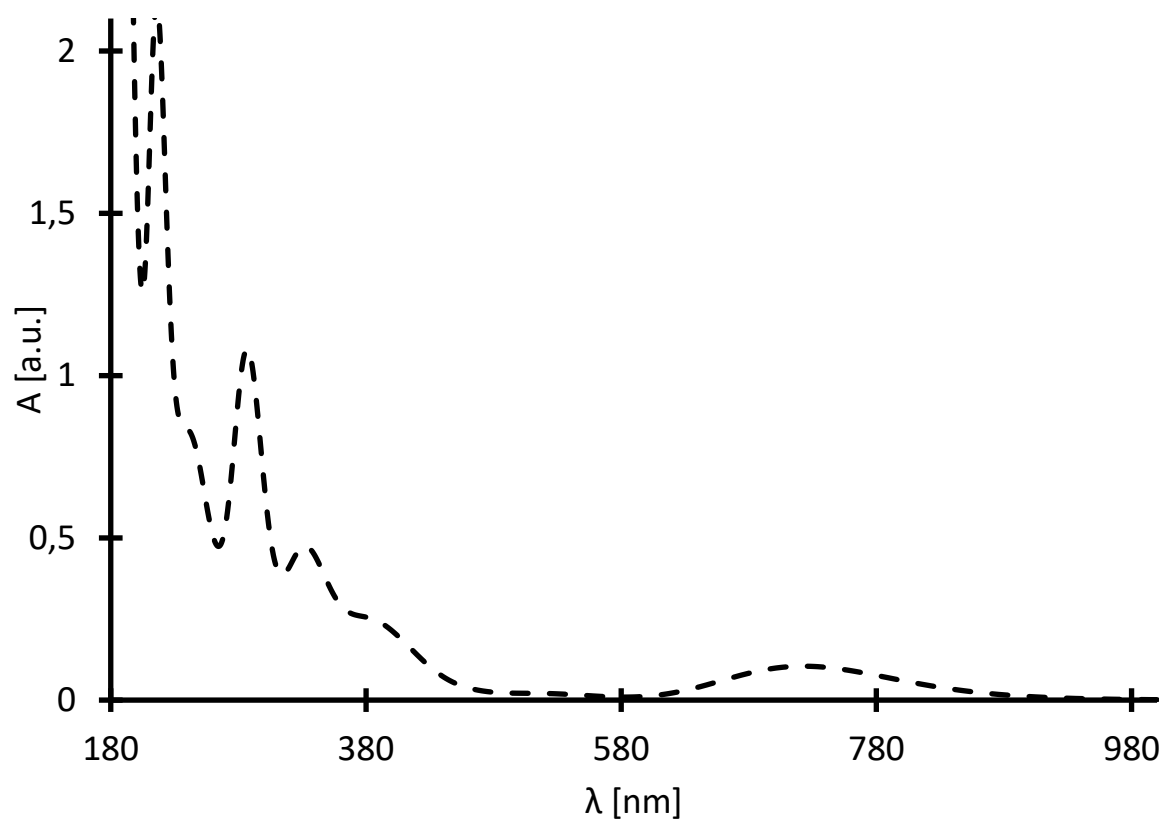

Figure S45: UV-vis spectrum of [K(18-c-6)][rac-7] in THF (line: experimental data, dotted: calculated spectrum).

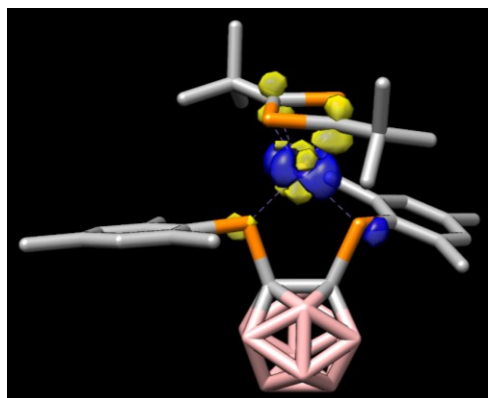

2 (722 nm,  $f_{osc} = 0.029$ )

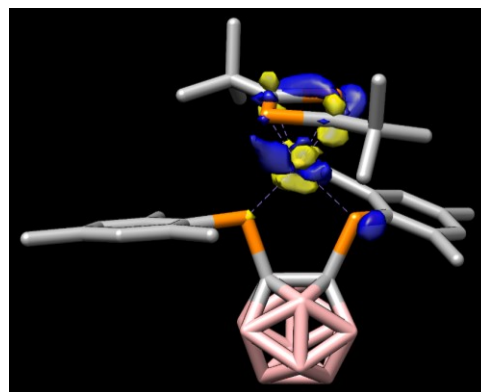

5 (418 nm,  $f_{osc} = 0.011$ )

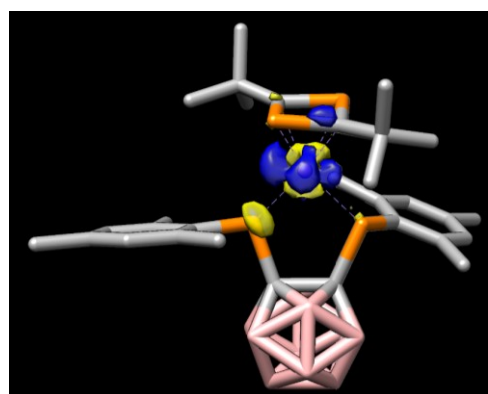

6 (408 nm,  $f_{osc} = 0.020$ )

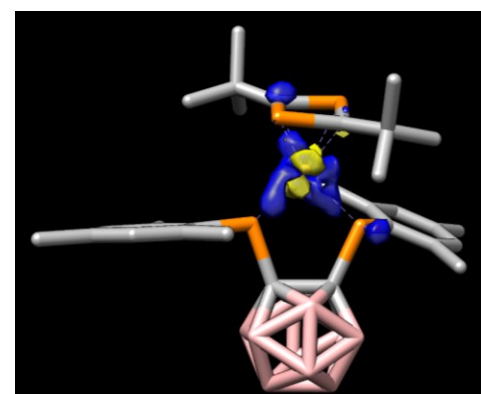

8 (380 nm,  $f_{osc} = 0.047$ )

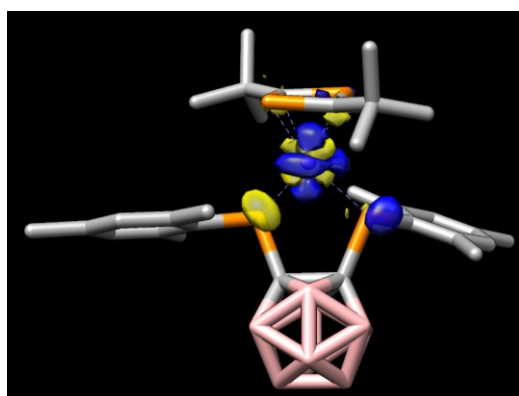

9 (351 nm,  $f_{osc} = 0.048$ )

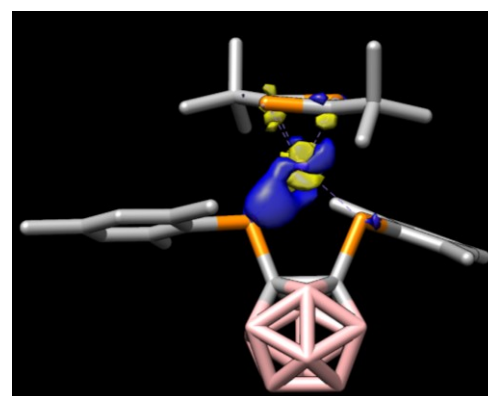

10 (330 nm,  $f_{osc} = 0.099$ )

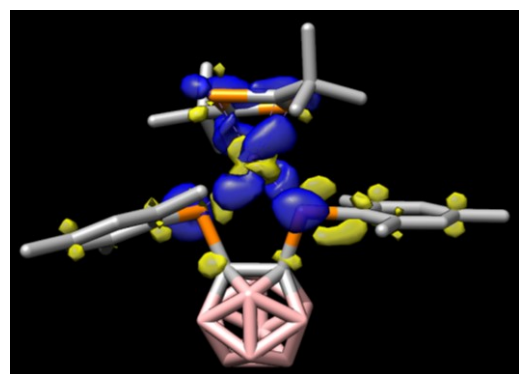

14 (288 nm,  $f_{osc} = 0.160$ )

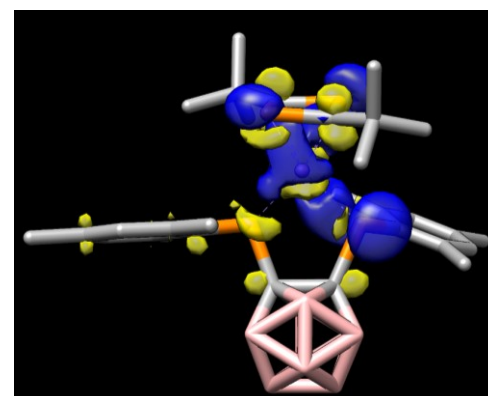

15 (284 nm,  $f_{osc} = 0.113$ )

Figure S46: Difference densities of calculated excited states of  $[rac-7]^-$  (transitions proceed from blue to yellow). The calculated wavelength of the absorption and the oscillator strength are given in parentheses.

[K(18-c-6)][*meso*-8]

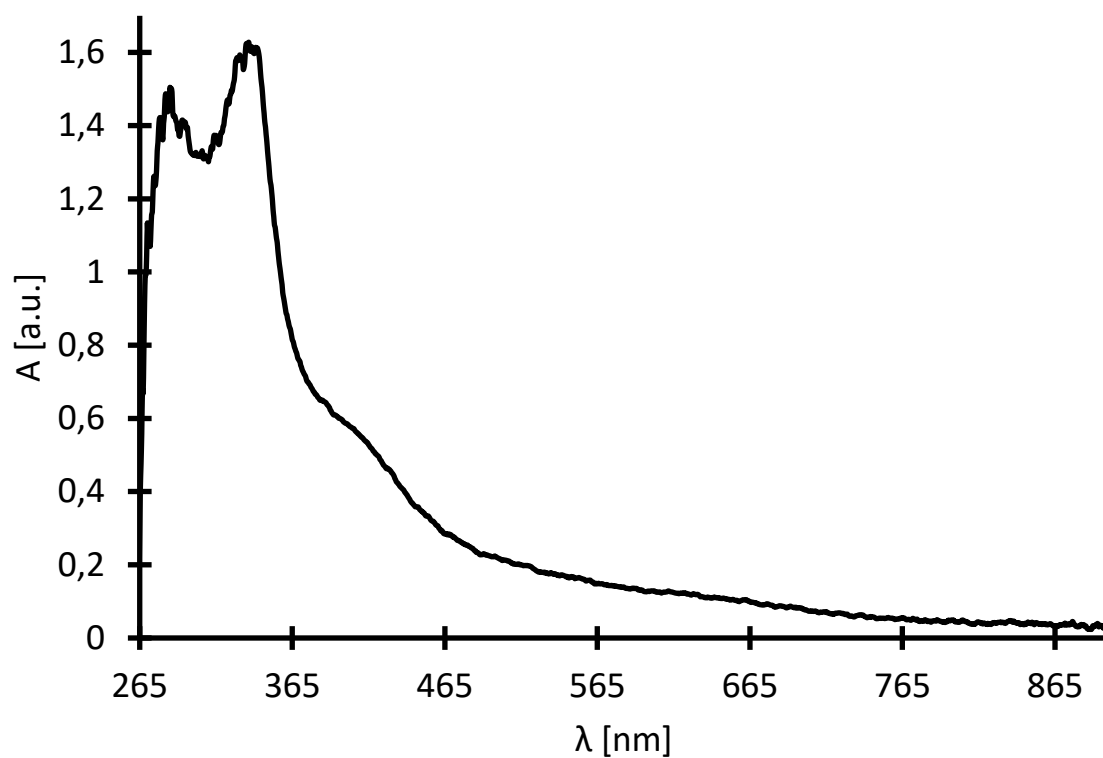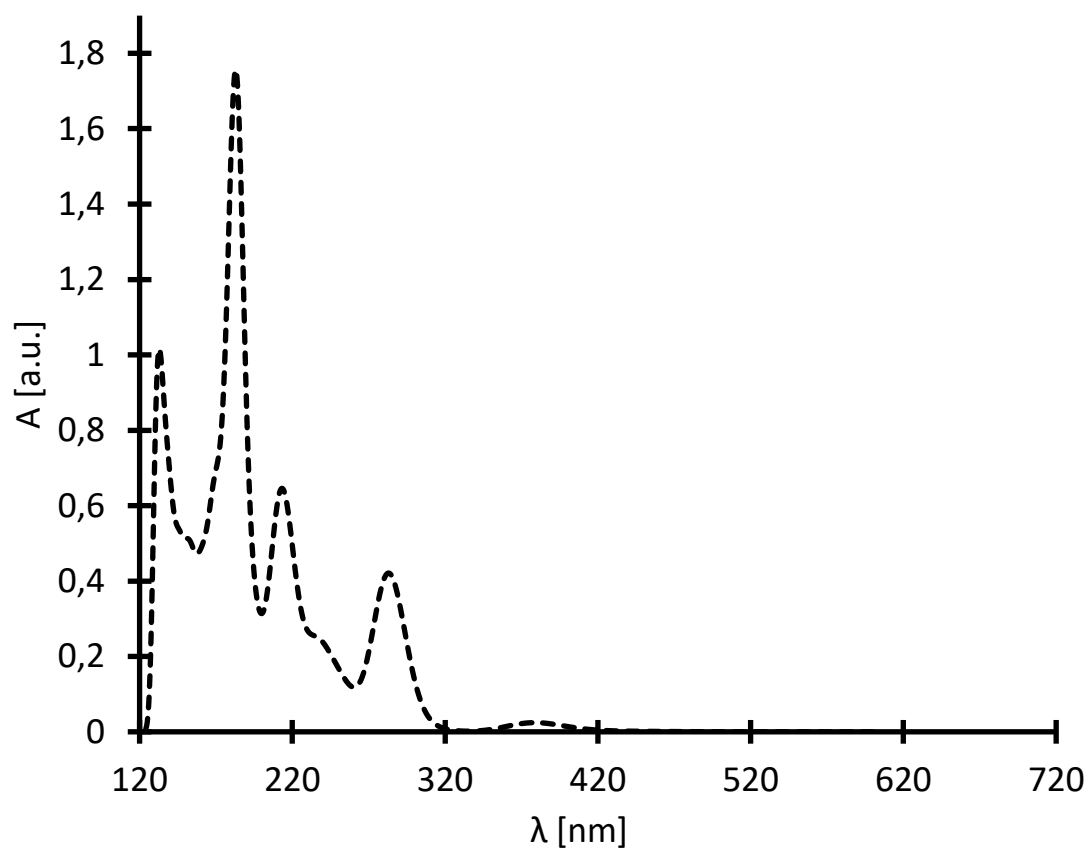

Figure S47: UV-vis spectrum of [K(18-c-6)][*meso*-8] in THF (line: experimental data, dotted: calculated spectrum).

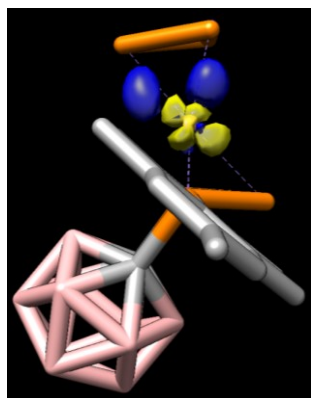

7 (384 nm,  $f_{osc} = 0.015$ )

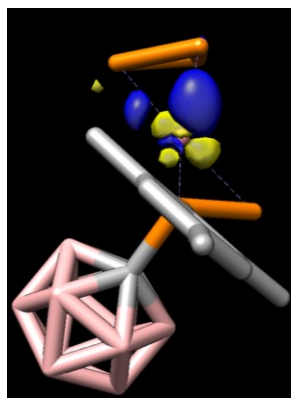

8 (375 nm,  $f_{osc} = 0.019$ )

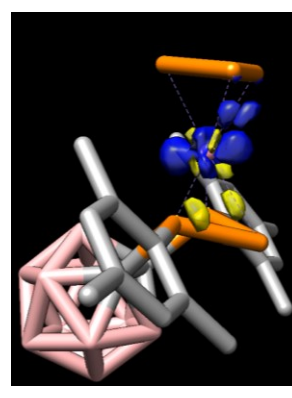

13 (283 nm,  $f_{osc} = 0.403$ )

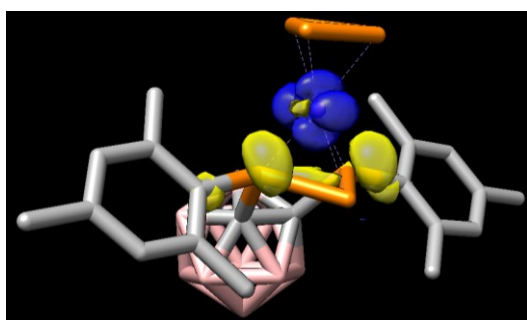

14 (280 nm,  $f_{osc} = 0.104$ )

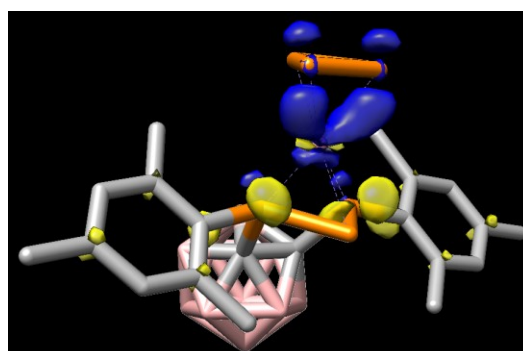

15 (286 nm,  $f_{osc} = 0.056$ )

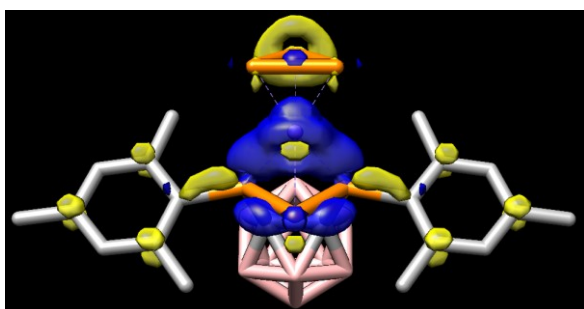

52 (215nm,  $f_{osc} = 0.220$ )

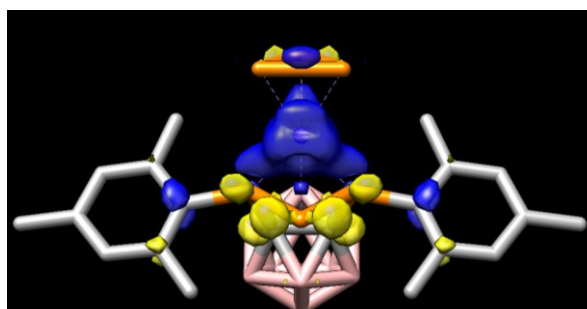

53 (215nm,  $f_{osc} = 0.101$ )

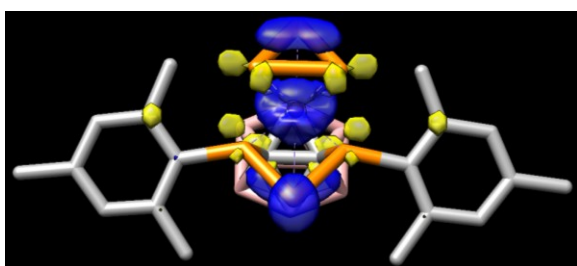

97 (184 nm,  $f_{osc} = 0.127$ )

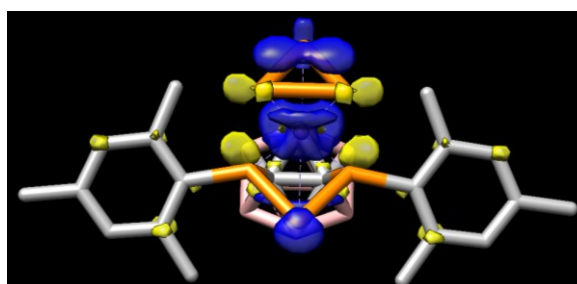

98 (184 nm,  $f_{osc} = 0.217$ )

Figure S48: Difference densities for selected transitions of  $[meso-8]^-$  (transitions proceed from blue to yellow). The calculated wavelength of the absorption and the oscillator strength are given in parentheses.

[K(18-c-6)]<sub>2</sub>[rac-9]

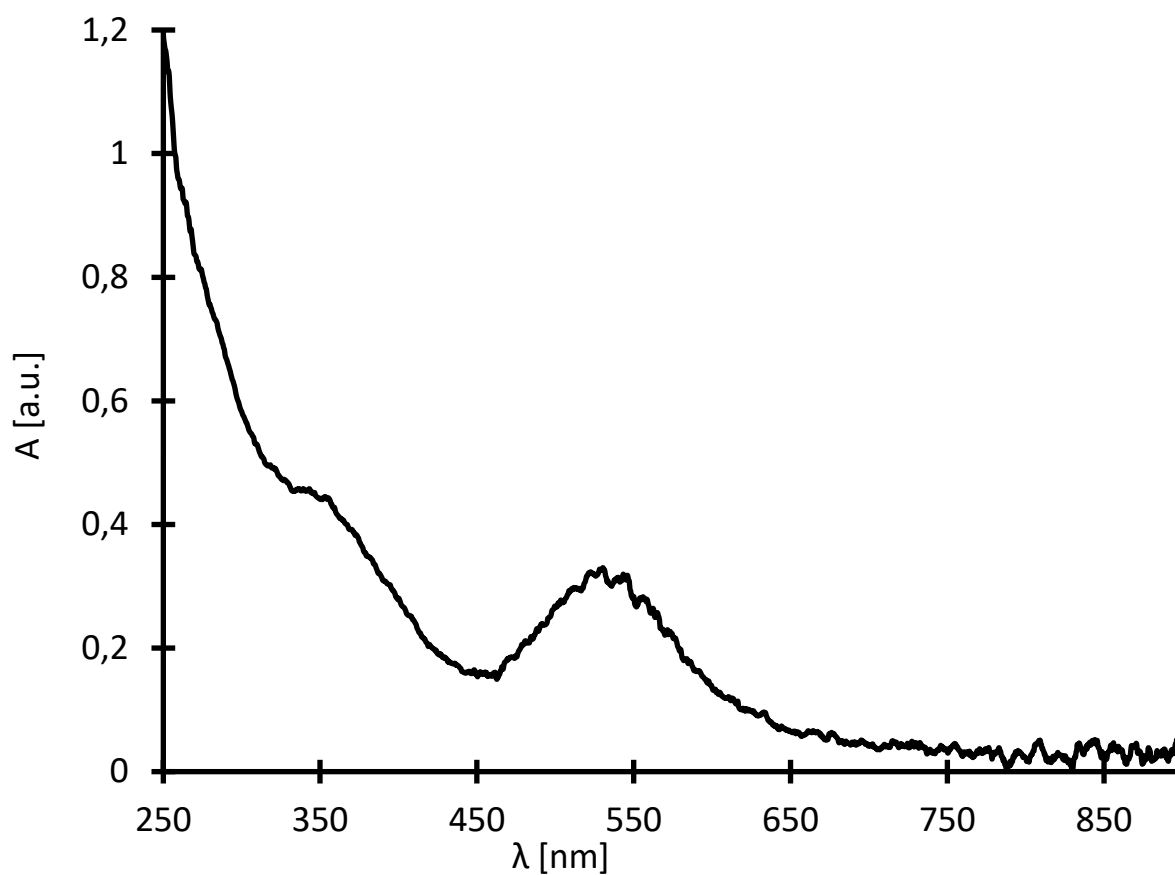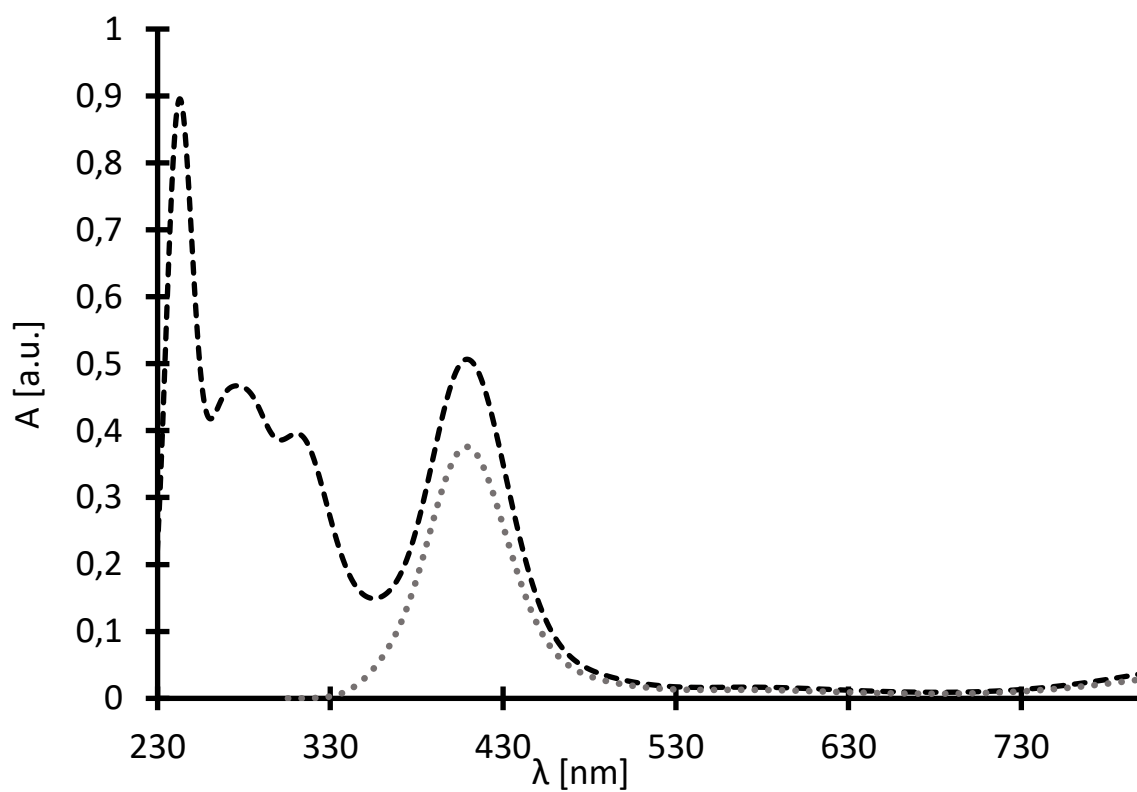

Figure S49: UV-vis spectrum of [K(18-c-6)]<sub>2</sub>[rac-9] in THF (line: experimental data, dotted: calculated spectrum (black: standard DFT, grey: BS-DFT)).

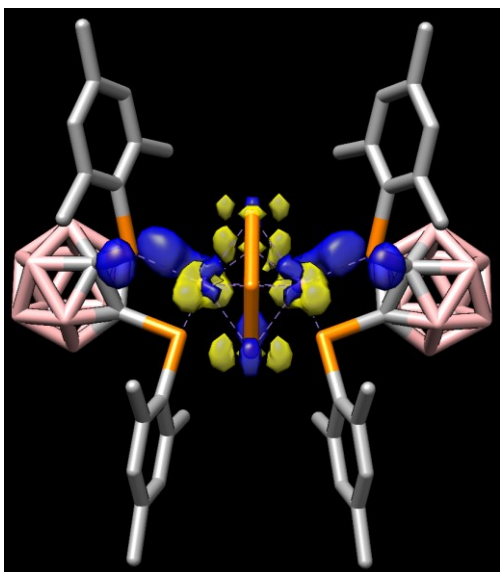

34 (BS, 410 nm,  $f_{osc} = 0.279$ )

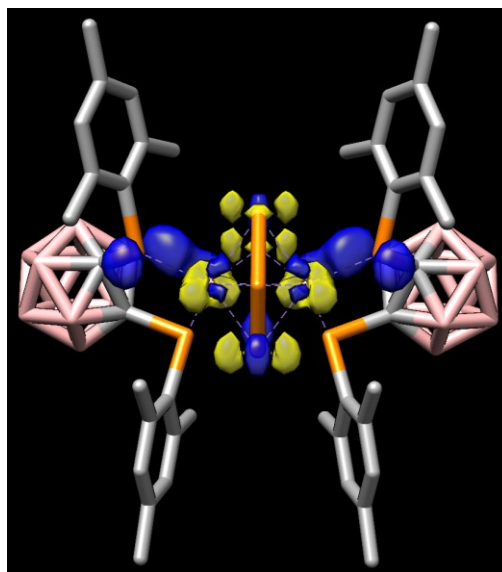

14 (410 nm,  $f_{osc} = 0.308$ )

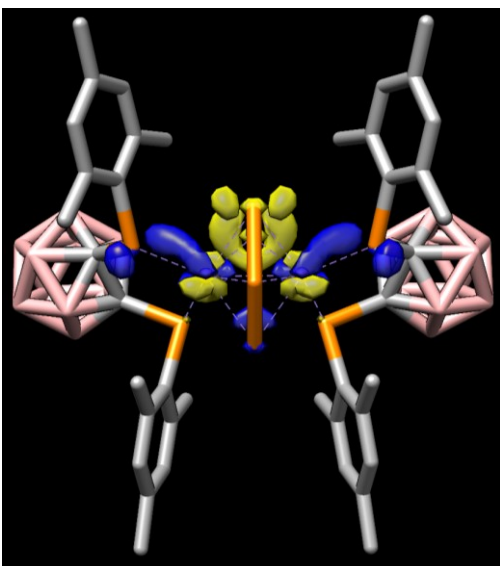

32 (314 nm,  $f_{osc} = 0.076$ )

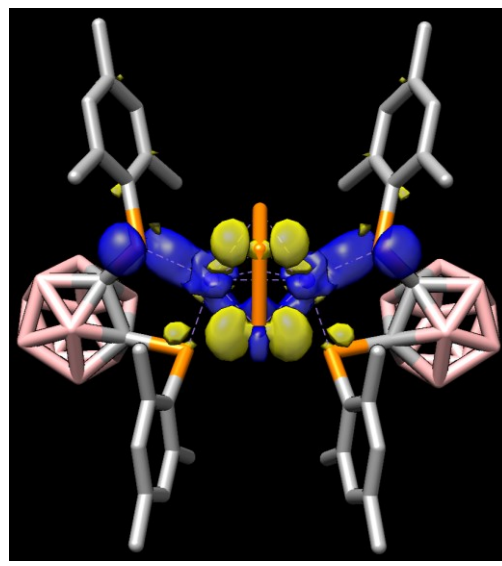

34 (308 nm,  $f_{osc} = 0.082$ )

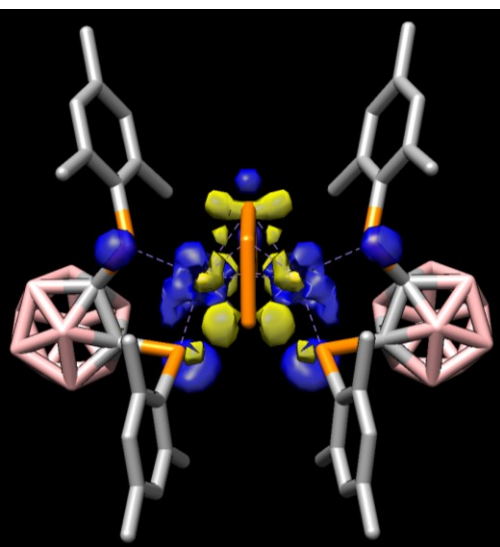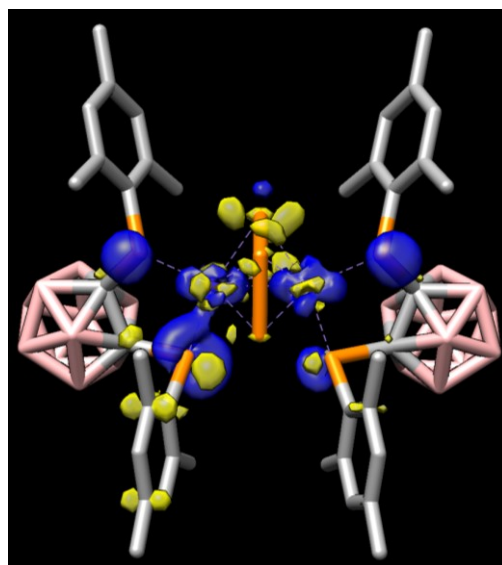

39 (292 nm,  $f_{osc} = 0.080$ )

41 (286nm,  $f_{osc} = 0.049$ )

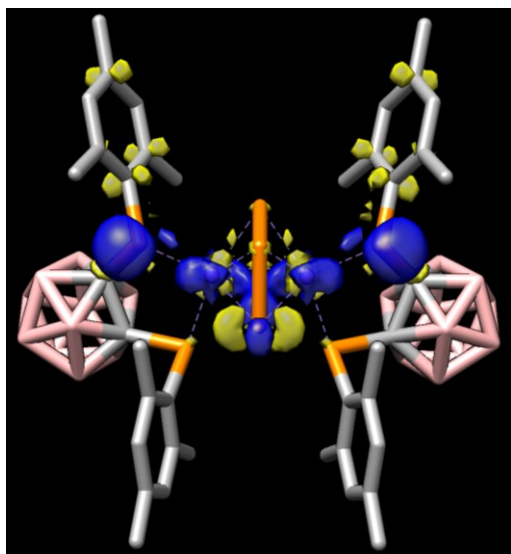

43 (282nm,  $f_{osc} = 0.071$ )

Figure S50: Difference densities for selected transitions of  $[rac-9]^{2-}$  (transitions proceed from blue to yellow). The calculated wavelength of the absorption and the oscillator strength are given in parentheses.



## 11.Relevant Natural Orbitals obtained from CASSCF calculations

[*rac-1*]<sup>-</sup>

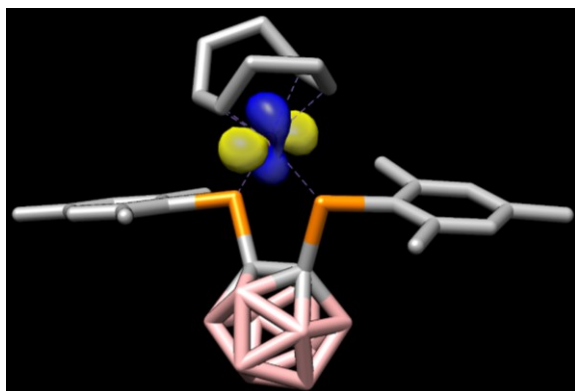

155 (1.969, 84%)

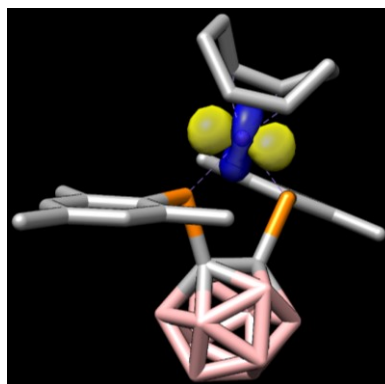

156 (1.960, 92%)

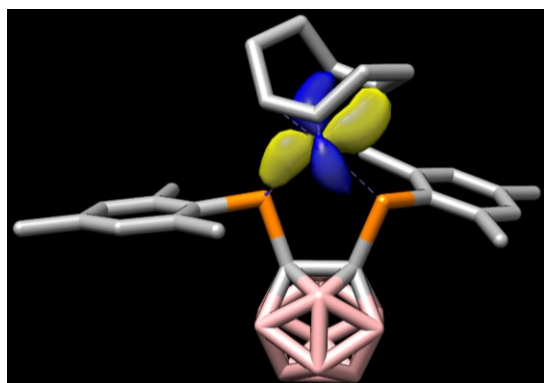

157 (1.931, 77%)

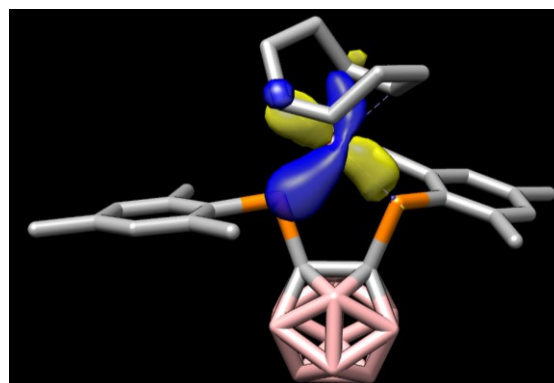

158 (1.927, 57%)

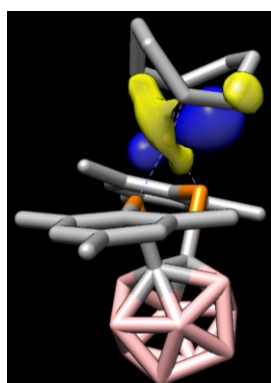

159 (1.906, 62%)

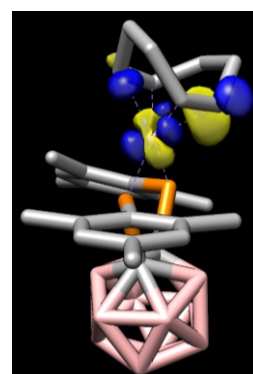

160 (0.099, 59%)

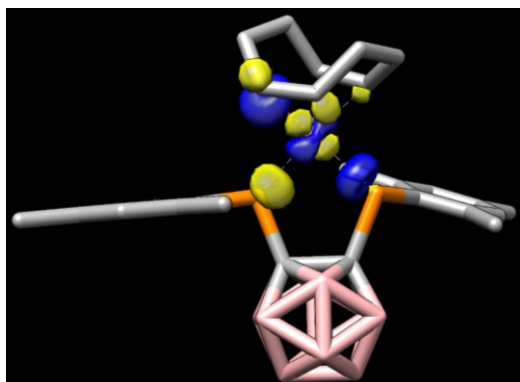

161 (0.080, 61%)

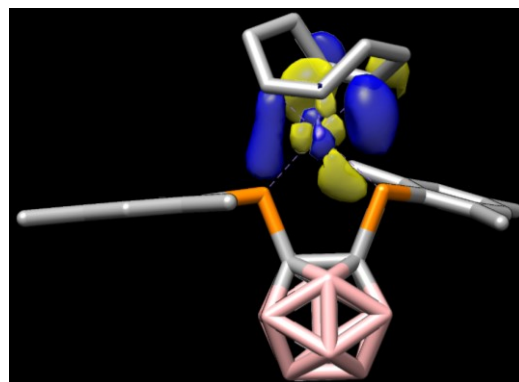

162 (0.067)

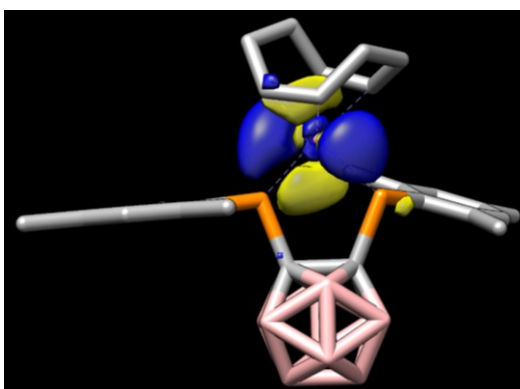

163 (0.034)

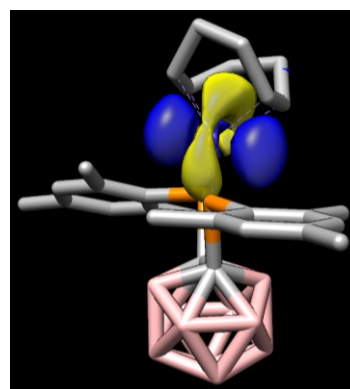

164 (0.028)

Figure S51: Natural orbitals of the active space describing the ground-state of  $[rac-1]^-$ . Contributions of 3d orbitals on cobalt and orbital occupations are given in parentheses.

*rac-2*

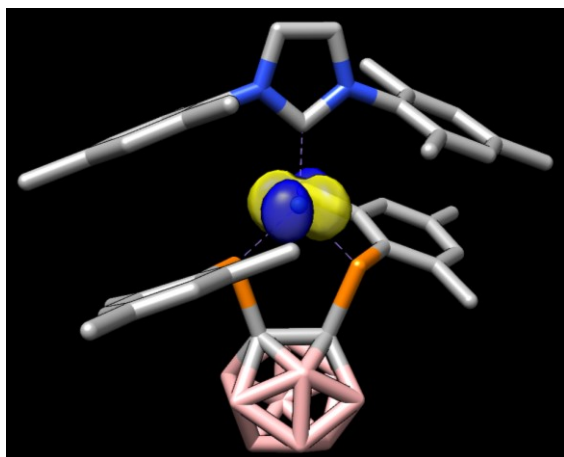

207 (1.976, 97%)

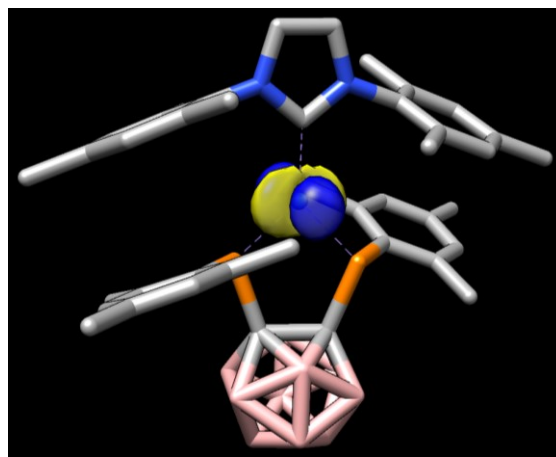

208 (1.974, 96%)

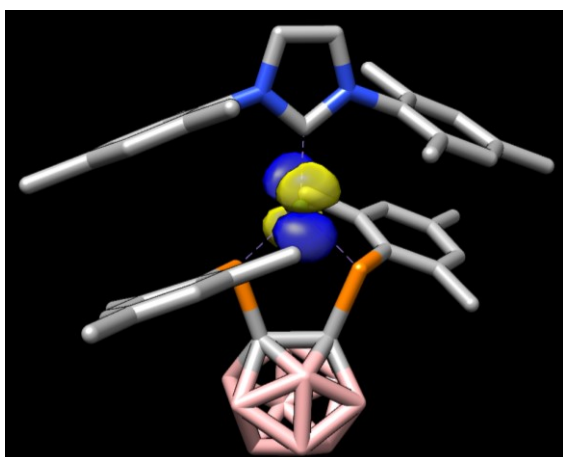

209 (1.971, 93%)

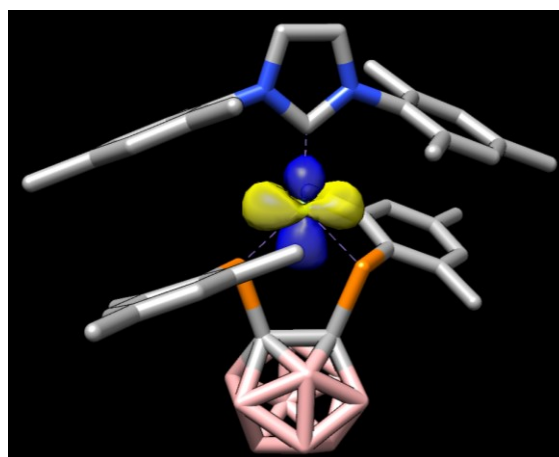

210 (1.965, 89%)

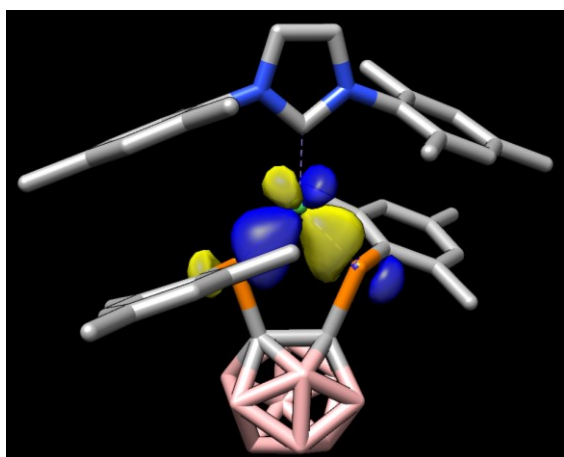

211 (1.912, 61%)

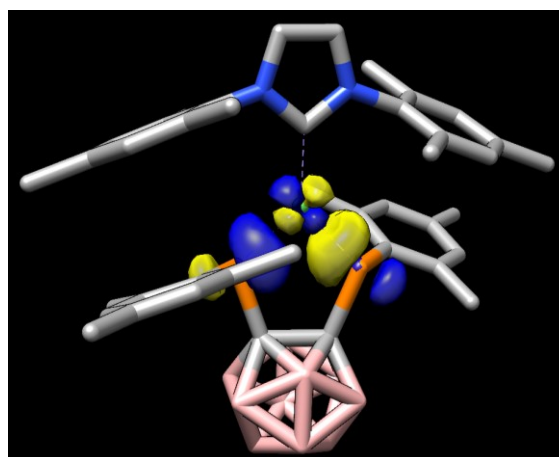

212 (0.093, 56%)

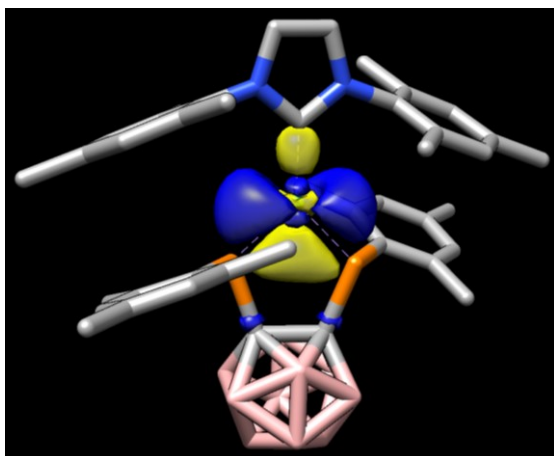

213 (0.035)

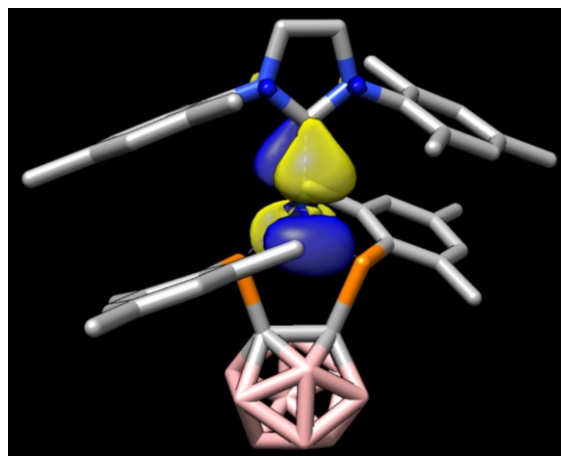

214 (0.028)

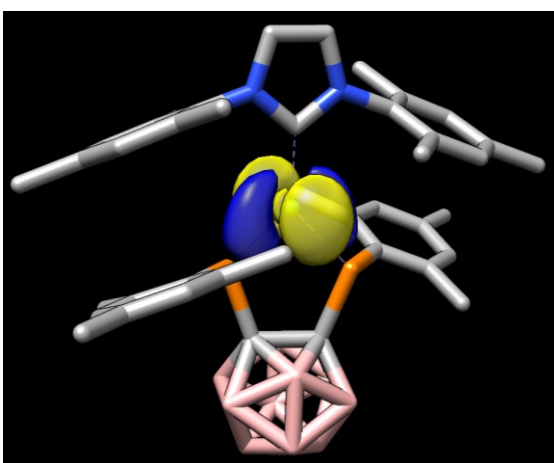

215 (0.024)

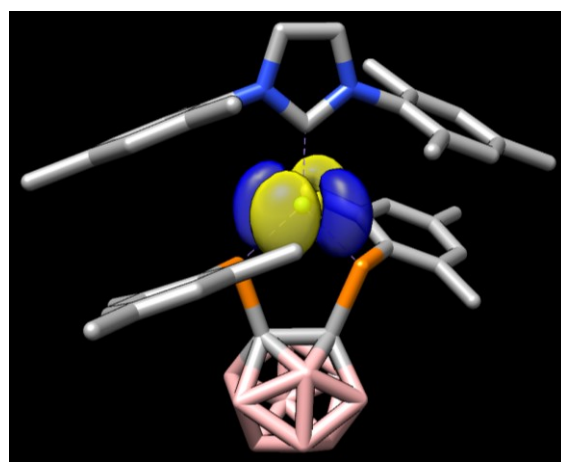

216 (0.022)

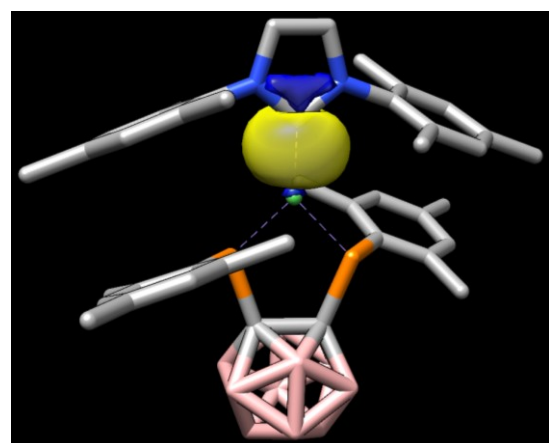

128 (2.000)

Figure S52: Natural orbitals of the active space describing the ground-state of *rac-2*. In addition, the nickel-carbene bonding orbital is shown as well (128). Contributions of 3d orbitals on cobalt and orbital occupations are given in parentheses.

[rac-6]<sup>-</sup>

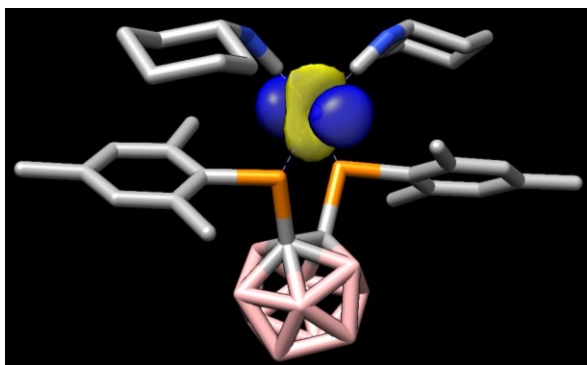

185 (1.959, 91%)

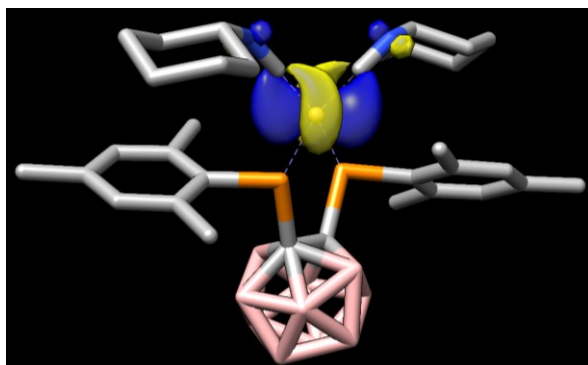

186 (1.948, 87%)

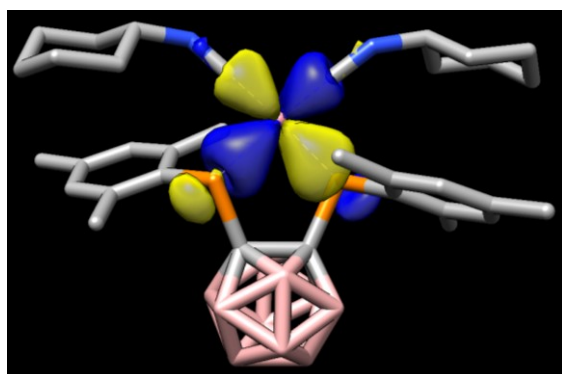

187 (1.944, 54%)

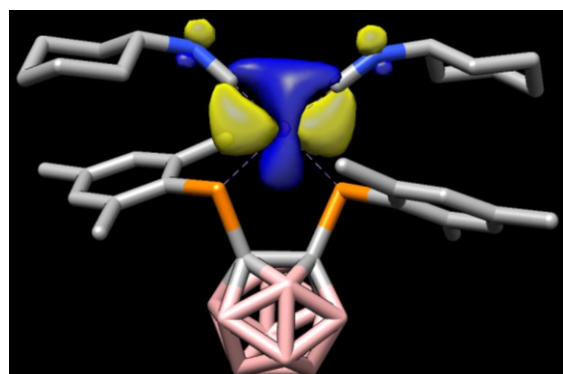

188 (1.937, 80%)

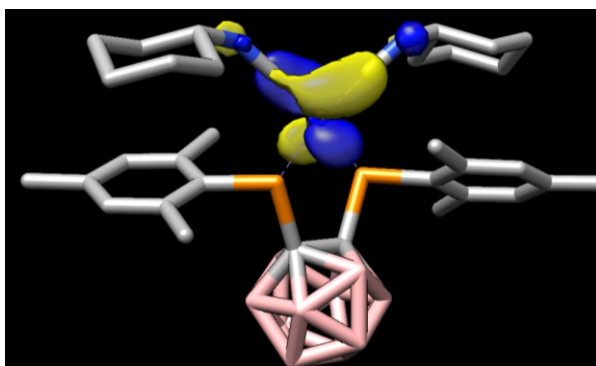

189 (1.934, 81%)

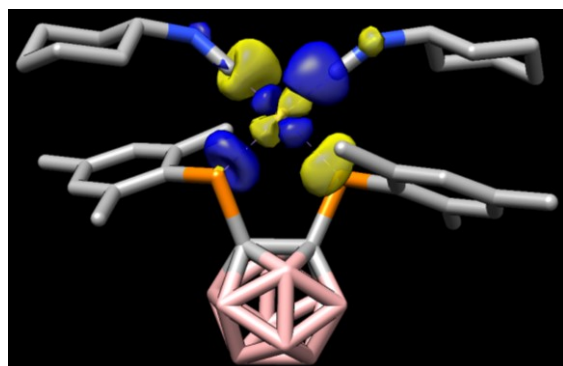

190 (0.069, 69%)

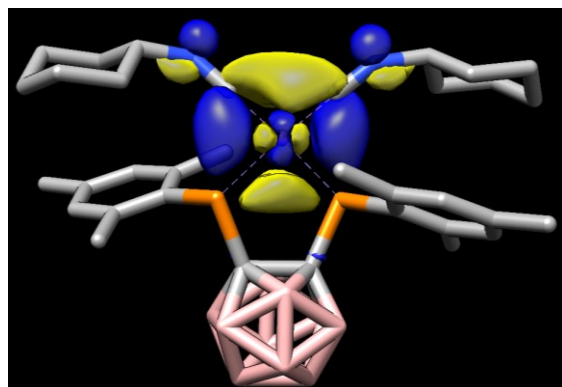

191 (0.064, 61%)

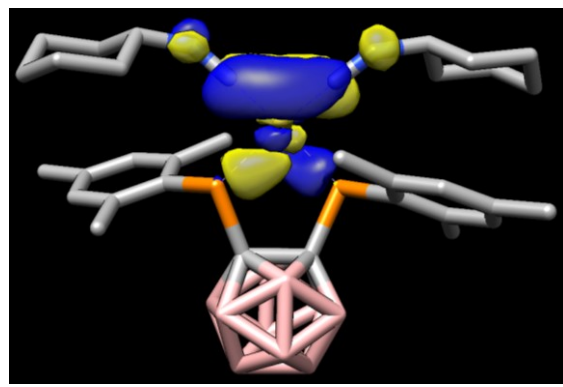

192 (0.063)

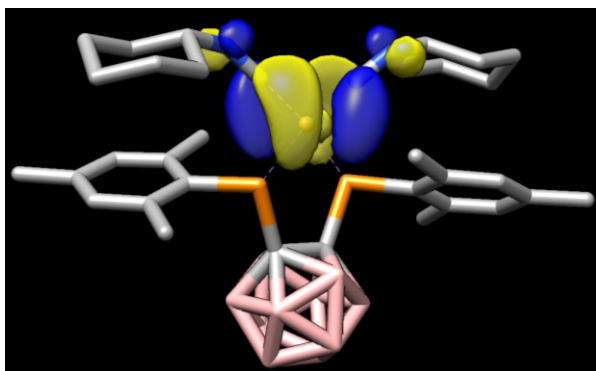

193 (0.049)

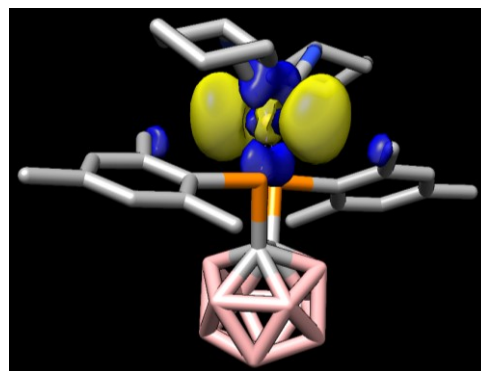

194 (0.036)

Figure S53: Natural orbitals of the active space describing the ground-state of  $[rac-6]^-$ . Contributions of 3d orbitals on cobalt and orbital occupations are given in parentheses.

$[rac-7]^-$

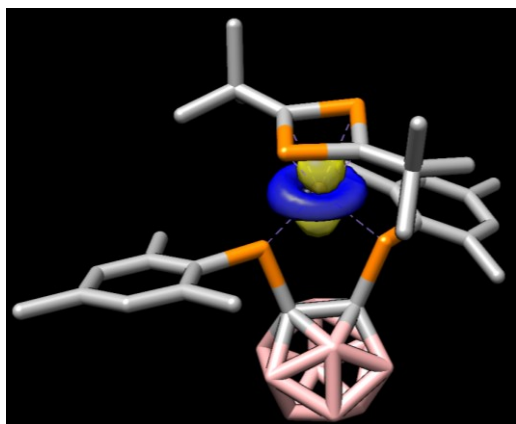

179 (1.997, 92%)

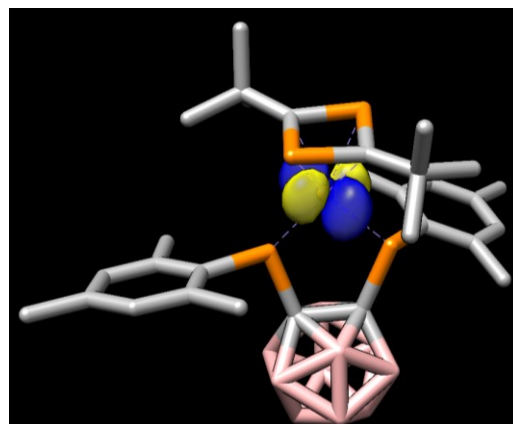

180 (1.978, 93%)

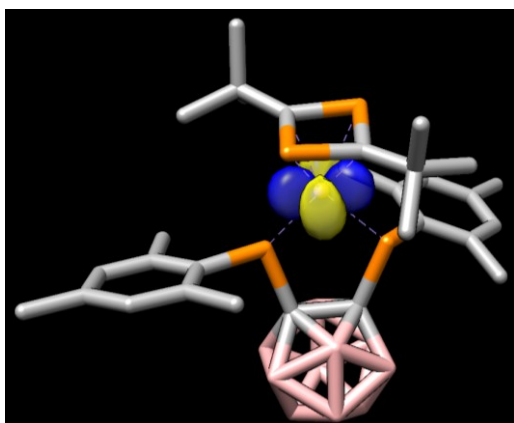

181 (1.977, 95%)

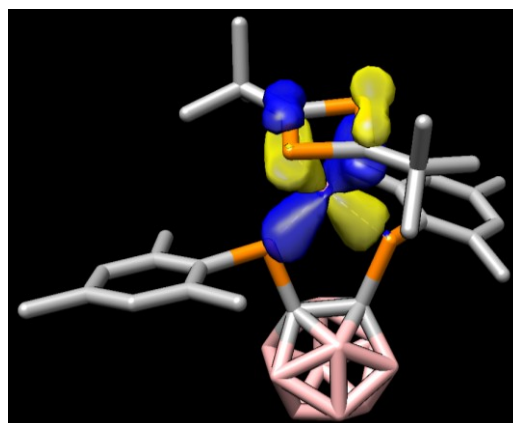

182 (1.899, 49%)

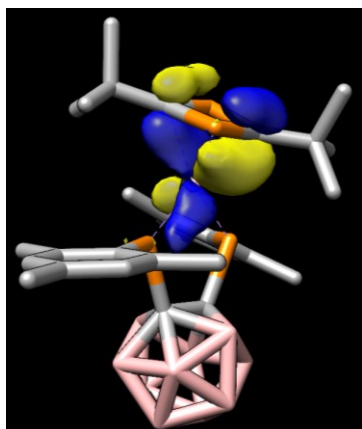

183 (1.864, 44%)

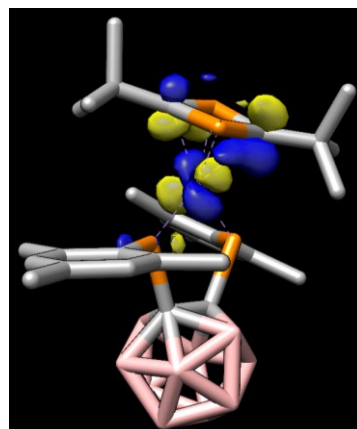

184 (0.163, 63%)

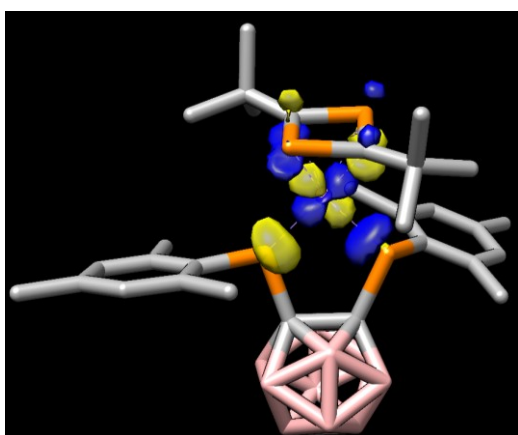

185 (0.122, 64%)

Figure S54: Natural orbitals of the active space describing the ground-state of  $[rac-7]^-$ . Contributions of 3d orbitals on cobalt and orbital occupations are given in parentheses.

$[meso-8]^-$

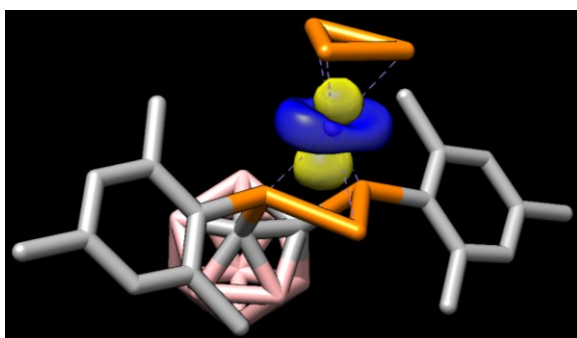

155 (1.997, 83%)

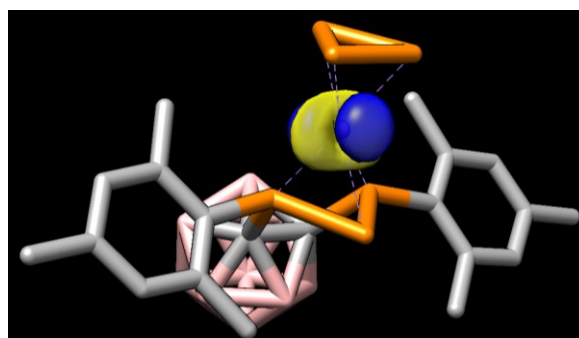

156 (1.992, 90%)

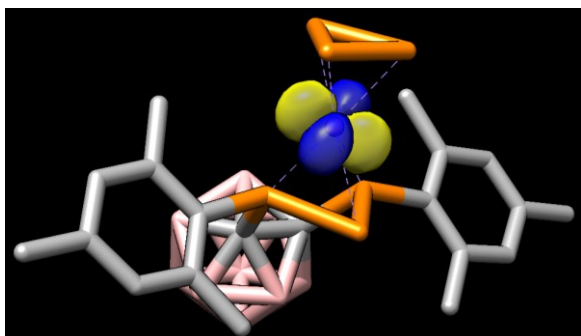

157 (1.992, 94%)

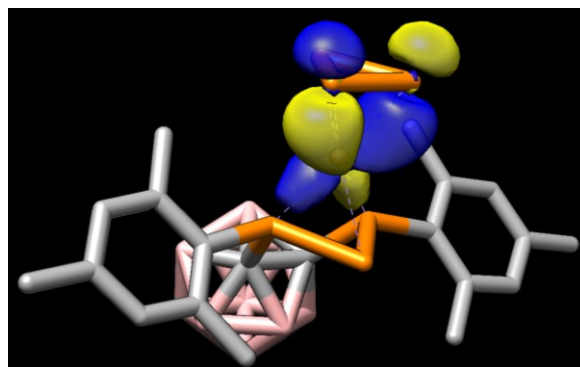

158 (1.862, 51%)

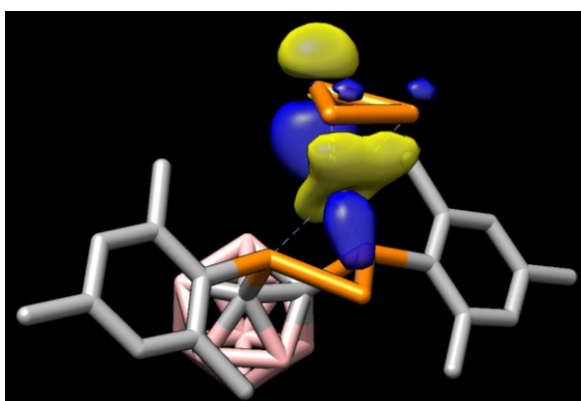

159 (1.854, 50%)

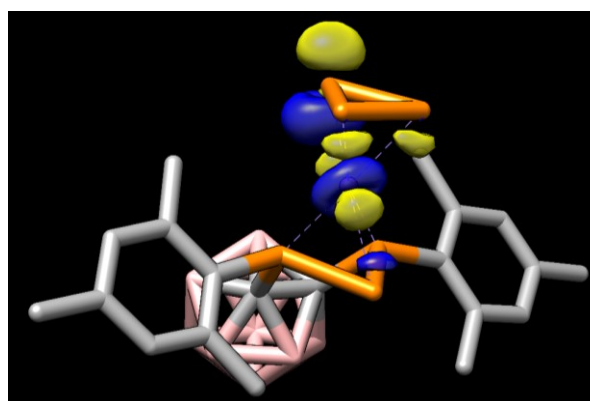

160 (0.155, 60%)

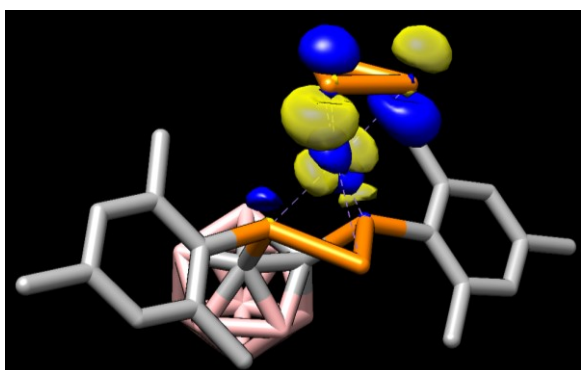

161 (0.147, 60%)

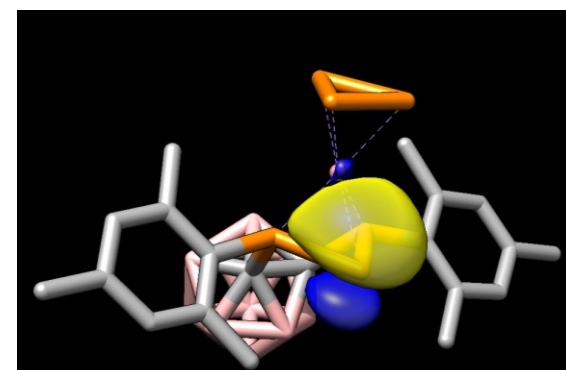

76 (2.000)

Figure S55: Natural orbitals of the active space describing the ground-state of  $[\text{meso-8}]^-$ . In addition the orbital describing the bonding interaction between cobalt and P2 (referring to Figure 4 in the main text) is shown as well. Contributions of 3d orbitals on cobalt and orbital occupations are given in parentheses.



## 12. Broken-symmetry DFT calculations on $[rac-9]^{2-}$

Due to its molecular size and the presence of two interacting metal centres in  $[rac-9]^{2-}$ , broken-symmetry DFT was used to analyse its electronic structure (TPSS0/def2-TZVP). Figure S56 contains the obtained spin density and the natural orbitals of the broken-symmetry solution. Here, the doubly-occupied natural orbitals were further localised using intrinsic bond orbitals (IBO). The spin density and the orbital pair 289/290 show the antiferromagnetic coupling of two spins localised equally on the cobalt atoms. In addition, three doubly occupied 3d orbitals are found for each cobalt centre (9, 128, 131, 85, 188, 189). The remaining seven orbitals in Figure SXX describe bonding interactions within the Co2P4 fragment. Thus, 14 electrons are located within this cluster, making it a *closo*-cluster.

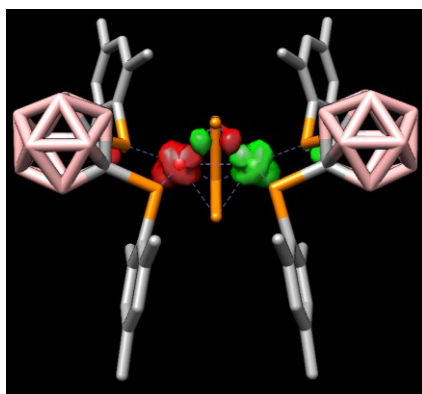

spin density

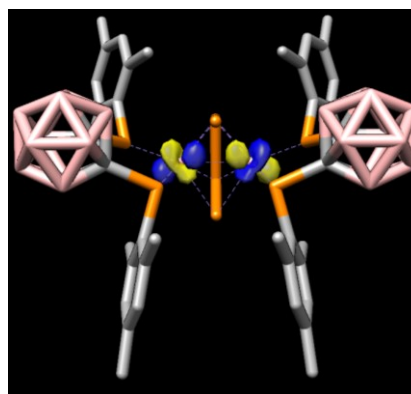

289 (1.673)

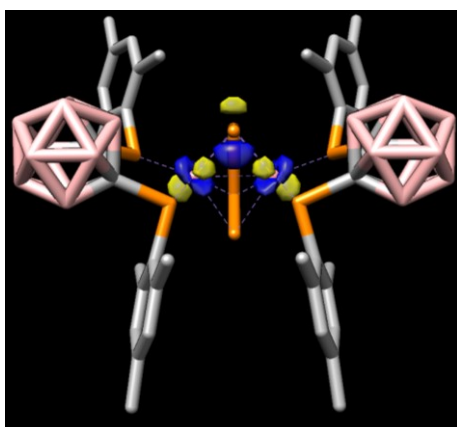

290 (0.327)

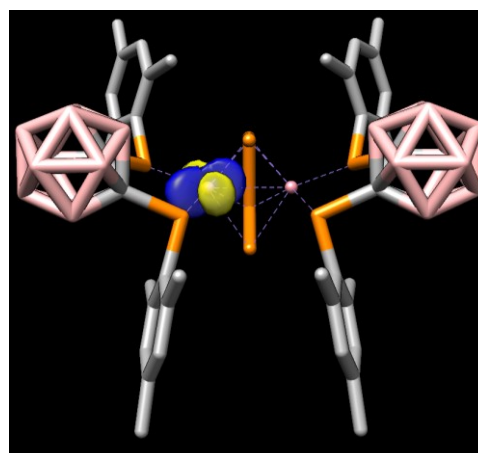

9 (2.000)

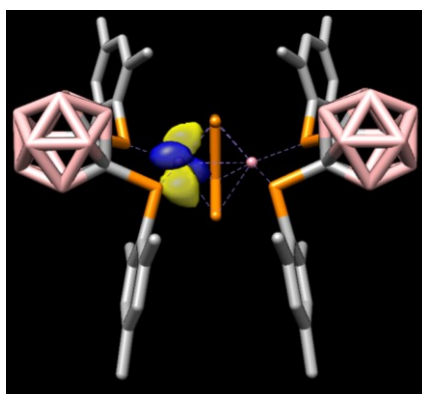

128 (2.000)

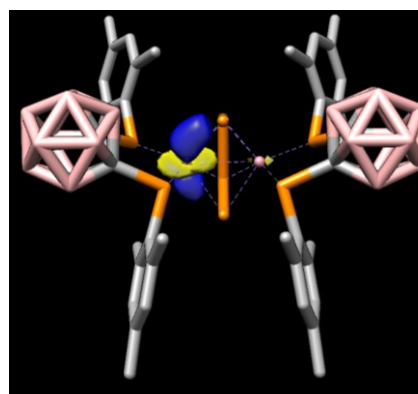

131 (2.000)

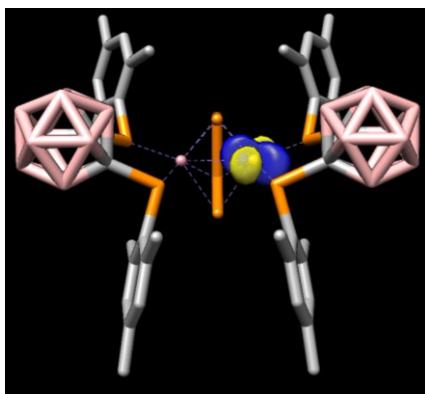

85 (2.000)

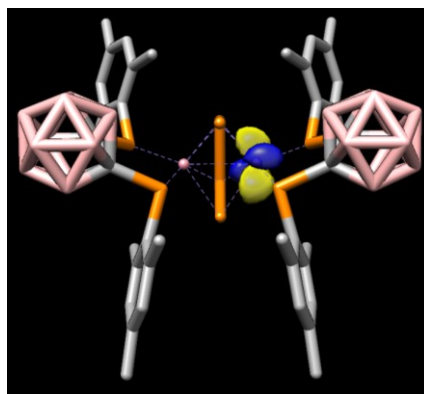

188 (2.000)

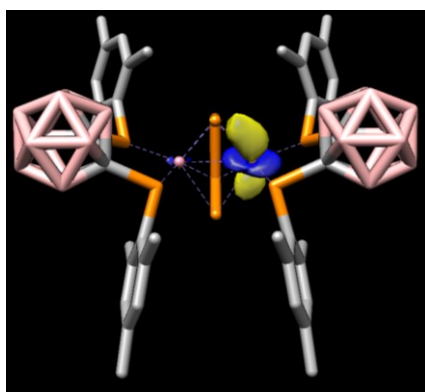

189 (2.000)

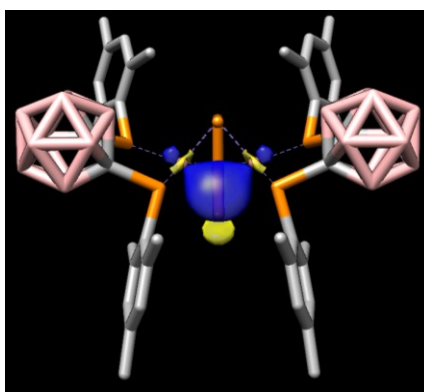

260 (2.000)

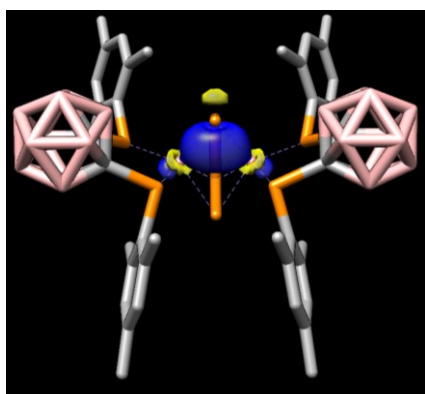

261 (2.000)

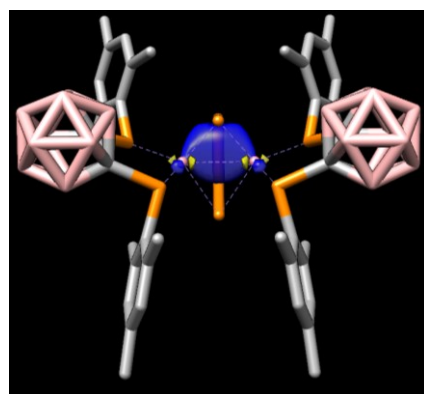

184 (2.000)

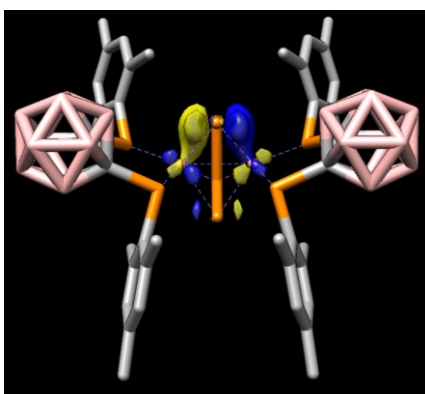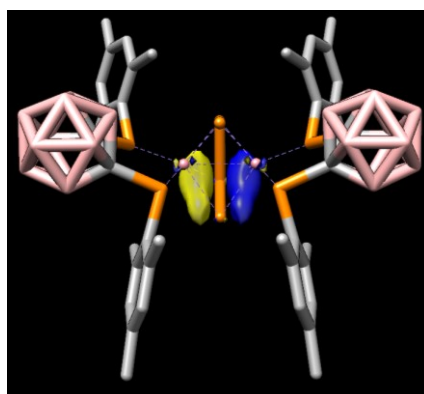

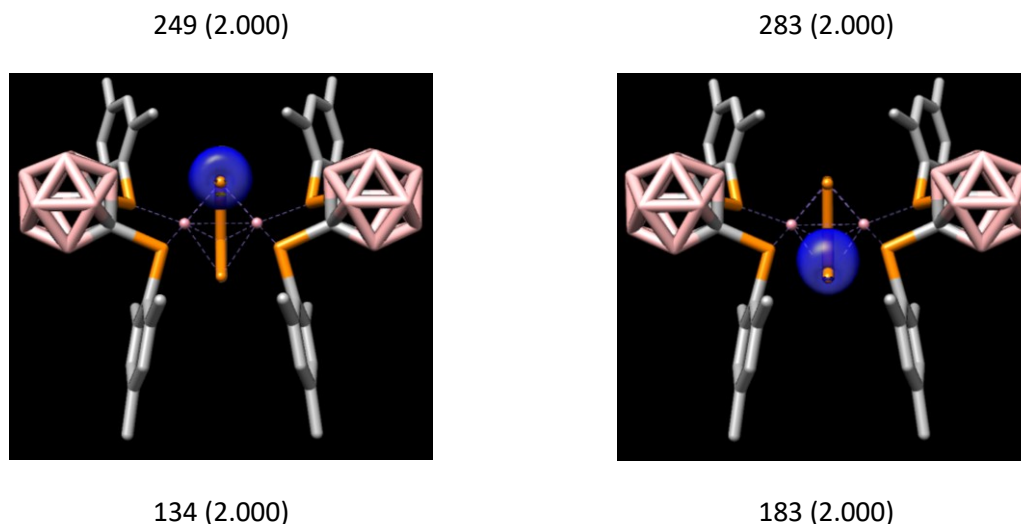

Figure S56: Spin density and partially localised natural orbitals obtained from a broken-symmetry calculation on  $[rac-9]^{2-}$ .

### 13. Cartesian coordinates of optimised structures

#### 1,5-cyclooctadiene

|   |                   |                  |                   |
|---|-------------------|------------------|-------------------|
| C | -5.45590039892631 | 2.99690419217797 | 24.45027085052491 |
| C | -4.67979378607789 | 2.19622062260459 | 25.18989698299774 |
| H | -5.19395255838294 | 1.49567127129746 | 25.84824031158754 |
| C | -2.92226969336024 | 1.52925562470352 | 22.68119310132205 |
| H | -2.77289215370744 | 0.70383722338273 | 21.98403288009005 |
| C | -5.08225190257622 | 4.04172065647996 | 23.43149779086462 |
| H | -5.25081723462233 | 5.04042245083204 | 23.86423619979026 |
| H | -5.79665457790654 | 3.96250480479228 | 22.60003705348275 |
| C | -3.34634549769932 | 2.68317089467879 | 22.15288406948664 |
| C | -3.65218593483618 | 3.98696385339144 | 22.85014920943096 |
| H | -3.56303177949733 | 4.79989852798295 | 22.11983754876374 |
| H | -2.92138725191036 | 4.20349258955286 | 23.63133858816488 |
| C | -2.61093721275382 | 1.17165398986843 | 24.11100480768754 |
| H | -1.51864482948152 | 1.09940920535364 | 24.23249193424367 |
| H | -2.98931818080172 | 0.15485792583036 | 24.28688265516372 |
| C | -3.17340512329229 | 2.09663722015192 | 25.21288251863363 |
| H | -2.86829112151560 | 1.67912958827983 | 26.17970732877286 |
| H | -2.70669530373081 | 3.08124176573939 | 25.15013646603275 |
| H | -6.53240552060855 | 2.89221716780197 | 24.59113603393315 |
| H | -3.52686993831259 | 2.68685042509784 | 21.07773366902657 |

#### P<sub>4</sub>

|   |                   |                   |                   |
|---|-------------------|-------------------|-------------------|
| P | -5.25697938367335 | 0.50769329439178  | 0.41808719253640  |
| P | -3.28377231162797 | -0.40840836051755 | 0.75551900577241  |
| P | -3.52712524825019 | 1.14502298802634  | -0.78531713752198 |
| P | -3.64262305644849 | 1.68165207809943  | 1.34666093921318  |

#### 1<sup>-</sup>

|    |                    |                   |                   |
|----|--------------------|-------------------|-------------------|
| Co | -5.11231793008454  | 1.29230068372103  | 23.15419884860417 |
| C  | -6.56709044828123  | -1.59135499411762 | 22.13374709273761 |
| C  | -3.20476514287236  | -2.81174107813507 | 21.71585545463637 |
| C  | -9.14836171807898  | 2.14937614248555  | 24.10171396728146 |
| C  | -5.55479534353824  | 2.79168989429899  | 24.46227338144379 |
| C  | -3.50027349482977  | -0.88979453137876 | 20.25691977031311 |
| C  | -9.11537216747173  | 3.06724845272170  | 21.84669082837368 |
| C  | -4.95787361963332  | 1.66403521321831  | 25.09353025277367 |
| H  | -5.62928188410300  | 0.96955281598041  | 25.59786552384115 |
| C  | -3.81388524630409  | -1.55144943492706 | 21.46673019223301 |
| C  | -2.64531260275900  | -1.50289787040427 | 19.32884140133096 |
| H  | -2.42943929467764  | -0.97958133626109 | 18.39708780246163 |
| C  | -8.62799142996894  | 1.24374325774850  | 25.18608949461701 |
| H  | -9.24098934733356  | 0.33760805457699  | 25.25627677280411 |
| H  | -8.65499756646936  | 1.74609627230773  | 26.15935038527635 |
| H  | -7.60509446627792  | 0.92912733707233  | 24.96899825011555 |
| C  | -3.03596848012111  | 1.24529371980461  | 23.13127232594683 |
| H  | -2.64844786804018  | 0.54599972768629  | 22.39368760587251 |
| C  | -4.82304372881677  | 4.07735676717083  | 24.13521148974605 |
| H  | -4.69453499259478  | 4.71997158448972  | 25.02542517950954 |
| H  | -5.44776874943719  | 4.64298128981804  | 23.43324943115420 |
| C  | -3.54038005636448  | 2.47947806685365  | 22.67661004652513 |
| C  | -2.06882501258040  | -2.74790112724630 | 19.55575334072730 |
| C  | -3.46694431534646  | 3.77680361555044  | 23.47155849616522 |
| H  | -3.18256475285947  | 4.59797350374853  | 22.80081042897987 |
| H  | -2.67371132090746  | 3.70896391588047  | 24.22404063864332 |
| C  | -2.55946008999893  | 1.00648358057765  | 24.54965962606379 |
| H  | -1.53370114782023  | 1.38584832083940  | 24.70008761461684 |
| H  | -2.51962667940788  | -0.07803626730203 | 24.70173891757229 |
| C  | -2.35385861567611  | -3.38141182470239 | 20.76740490871461 |
| H  | -1.90432836089652  | -4.35068654909061 | 20.98249089271971 |
| C  | -4.01627622629783  | 0.47987524552908  | 19.89159814870610 |
| H  | -3.18866035627643  | 1.20120840907663  | 19.88069833380143 |
| H  | -4.77170751219529  | 0.83318368066996  | 20.59704991902684 |
| H  | -4.45269603112068  | 0.46929685389197  | 18.88614817554597 |
| C  | -3.51869990591206  | 1.62249149858732  | 25.59730761548824 |
| H  | -3.47643872792352  | 1.02729321285234  | 26.51740030948776 |
| H  | -3.18894782624715  | 2.63213063345126  | 25.87015538903347 |
| C  | -10.26085291439208 | 2.95348869422956  | 24.38462350678148 |
| H  | -10.69937102149335 | 2.90888495899638  | 25.38141895594835 |
| C  | -10.82211350273290 | 3.79915189903257  | 23.43214743708378 |
| C  | -8.52504723826462  | 3.18391046310099  | 20.45989732803908 |
| H  | -8.53698799148098  | 2.22081041535603  | 19.93993048091486 |
| H  | -7.47720149841027  | 3.49989119779020  | 20.50259968695974 |
| H  | -9.09274327784771  | 3.91050780980603  | 19.86728457397197 |
| C  | -10.23033278024178 | 3.84305783433725  | 22.16571344996472 |
| H  | -10.64670379428186 | 4.50142665818590  | 21.40359245145394 |
| C  | -3.45741604472388  | -3.58681805626669 | 22.98723022960195 |
| H  | -4.47844104936401  | -3.98045022061650 | 23.01174420757005 |
| H  | -3.35404280101147  | -2.94776735549431 | 23.86932950717232 |
| H  | -2.76077564042160  | -4.43022815058438 | 23.05932168539891 |
| C  | -1.18040105310855  | -3.40225870599189 | 18.52548256729419 |

|   |                    |                   |                   |
|---|--------------------|-------------------|-------------------|
| H | -1.70844057215351  | -4.21458543087707 | 18.00860952307524 |
| H | -0.28724122980032  | -3.83894446327815 | 18.98773050643142 |
| H | -0.85715024679373  | -2.68092492076384 | 17.76788968216858 |
| C | -12.03311085805731 | 4.64277455802546  | 23.75011884308663 |
| H | -11.83877876741020 | 5.70634609710458  | 23.56395552092422 |
| H | -12.32660665395786 | 4.52934697822764  | 24.79847079440669 |
| H | -12.88959456735330 | 4.35621535002491  | 23.12673879094909 |
| C | -7.76830811250747  | -0.44461096987216 | 22.03158843987498 |
| C | -8.56407105546273  | 2.19328767833196  | 22.81888002897026 |
| B | -7.23252955705280  | -3.09130966281913 | 22.66479391433258 |
| H | -6.55790181215373  | -3.77687241167716 | 23.35422074224650 |
| B | -8.36616719442785  | -3.58698994826188 | 21.40565146618294 |
| H | -8.56290155290958  | -4.73704659110897 | 21.17679333071856 |
| B | -8.31107189498335  | -2.36603508844104 | 20.11035683554082 |
| H | -8.46727850609111  | -2.62520308837908 | 18.96101612931483 |
| B | -8.88539781841854  | -0.83207379209225 | 20.79225027028765 |
| H | -9.38219183011267  | 0.06412703506588  | 20.19727805499156 |
| B | -9.64085296333292  | -2.34619271141814 | 21.29945413795532 |
| H | -10.76319701435433 | -2.59845169449919 | 20.99915298878373 |
| B | -7.78594390537522  | -1.56350251948908 | 23.33478544468865 |
| H | -7.46626853270832  | -1.18559253370548 | 24.40400604068727 |
| B | -9.27081634625646  | -1.08816501115022 | 22.50198504976655 |
| H | -10.04214312646447 | -0.37900934492988 | 23.05101240804711 |
| B | -7.15513204993562  | -1.12788435394171 | 20.58352168822450 |
| H | -6.47027741712004  | -0.45391428110100 | 19.90423834838785 |
| B | -6.81846732333363  | -2.81658816703534 | 20.96848378012437 |
| H | -5.87116246365030  | -3.33310632694490 | 20.48375759568136 |
| B | -8.96317326807594  | -2.79784876746581 | 22.88370190532824 |
| H | -9.58388482598777  | -3.36169328053873 | 23.72616178233743 |
| P | -7.04277396879211  | 1.26272795740053  | 22.32895099371337 |
| P | -4.93862901210321  | -0.88396024302191 | 22.79852261544805 |
| H | -6.62688872444394  | 2.92171002947698  | 24.59837728604787 |
| H | -3.62119376112000  | 2.60534574022856  | 21.59764074022979 |

## Int1

|   |                   |                   |                   |
|---|-------------------|-------------------|-------------------|
| C | -6.65250843653916 | -1.72204789336610 | 22.18195707804119 |
| C | -3.30492090254015 | -2.87429915383943 | 21.67788010053868 |
| C | -9.00812493079406 | 2.18250915708947  | 24.07115708711541 |
| C | -3.41095824891051 | -0.74941059483528 | 20.49109182494171 |
| C | -8.99081458607164 | 3.09265845698874  | 21.80949270148515 |
| C | -3.84979825529781 | -1.56652521211857 | 21.55914930930360 |
| C | -2.49335436607218 | -1.26212966715845 | 19.56317095541074 |
| H | -2.18072608601125 | -0.62398236376074 | 18.73724700382139 |
| C | -8.51620753249497 | 1.25984308874439  | 25.15110289333671 |
| H | -9.13984583560289 | 0.35994312010774  | 25.19985106270060 |
| H | -8.55955745863315 | 1.75268672930119  | 26.12848994219797 |
| H | -7.48952531179071 | 0.94251548157242  | 24.95561523477258 |
| C | -1.97551946518011 | -2.55066998289431 | 19.65690137529414 |
| C | -2.39035677202646 | -3.33926376037804 | 20.73144279767824 |

|    |                    |                   |                   |
|----|--------------------|-------------------|-------------------|
| H  | -1.99539670642283  | -4.34910569791721 | 20.83975914443385 |
| C  | -3.85510456536215  | 0.67553117162733  | 20.29668812575244 |
| H  | -3.26276153929904  | 1.35466772412357  | 20.92217000145744 |
| H  | -4.90002724061890  | 0.82722990854626  | 20.57716035953710 |
| H  | -3.71771989785401  | 0.97605989829509  | 19.25187634525178 |
| C  | -10.04970456198705 | 3.06519579041994  | 24.38563694362316 |
| H  | -10.45024149032398 | 3.05757137742234  | 25.39903301184933 |
| C  | -10.58438785657442 | 3.94644149408514  | 23.44990102363274 |
| C  | -8.44551231073399  | 3.17564380368037  | 20.40110109011623 |
| H  | -8.55296657186901  | 2.22266363146852  | 19.87368313516608 |
| H  | -7.37623051698775  | 3.41248506831839  | 20.40196010685405 |
| H  | -8.97862192761000  | 3.95063692295223  | 19.83871039320843 |
| C  | -10.03557539468969 | 3.94680537533851  | 22.16472504962914 |
| H  | -10.42683880202265 | 4.63505484968382  | 21.41614114701700 |
| C  | -3.69498317472866  | -3.80768716306279 | 22.79796067756815 |
| H  | -4.70745316799316  | -4.19789433956083 | 22.65125707800668 |
| H  | -3.69791989839915  | -3.28996861390750 | 23.76225410725363 |
| H  | -3.00526703823696  | -4.65803305741179 | 22.83894606768056 |
| C  | -0.99796833988563  | -3.07975581978090 | 18.63554759983021 |
| H  | -1.40028025158844  | -3.96192164752682 | 18.12194141235585 |
| H  | -0.05440976994303  | -3.38189019063163 | 19.10697649689555 |
| H  | -0.77169439715631  | -2.32175973483457 | 17.87912114098950 |
| C  | -11.72755689565172 | 4.86600435747256  | 23.80467806230165 |
| H  | -11.54355107077207 | 5.88626319983778  | 23.44849364215731 |
| H  | -11.88199919996550 | 4.90270966609688  | 24.88762651643801 |
| H  | -12.66410191216671 | 4.52496833944677  | 23.34435431258418 |
| C  | -7.81538765776801  | -0.54889645792577 | 22.01172385815992 |
| C  | -8.46937617666302  | 2.18237096234979  | 22.76648701622387 |
| B  | -7.36987813653387  | -3.18653892423423 | 22.74226784143364 |
| H  | -6.73082464943684  | -3.86184679304931 | 23.47417453748784 |
| B  | -8.47928580029363  | -3.68840918270074 | 21.46440932328064 |
| H  | -8.70231471260006  | -4.83867552260869 | 21.26500976540839 |
| B  | -8.34833831887555  | -2.51183230093404 | 20.13265020895050 |
| H  | -8.47851327698532  | -2.80305434796783 | 18.98839120284184 |
| B  | -8.89925140107037  | -0.94102177862647 | 20.75003295622451 |
| H  | -9.34465946297532  | -0.04748366187186 | 20.11212260302969 |
| B  | -9.71311896584938  | -2.41650600002868 | 21.27976738415640 |
| H  | -10.83150918680754 | -2.64886062636895 | 20.95176409896055 |
| B  | -7.89900486473285  | -1.62122138454423 | 23.34779554938512 |
| H  | -7.59246580052122  | -1.22094524819521 | 24.41133231879878 |
| B  | -9.34555789433175  | -1.13005051790316 | 22.45491302643564 |
| H  | -10.10681084307294 | -0.37896438947733 | 22.96125564104641 |
| B  | -7.17016547240452  | -1.29291687556272 | 20.60170183227617 |
| H  | -6.43458005172397  | -0.66154861596094 | 19.93077932234183 |
| B  | -6.89756054757826  | -2.97711124409583 | 21.05101486825388 |
| H  | -5.94792557937314  | -3.52826049711344 | 20.61066083273304 |
| B  | -9.09698657824468  | -2.83593956112277 | 22.89888492680658 |
| H  | -9.75862762372150  | -3.35558498824559 | 23.73768740604366 |
| P  | -7.04904633138342  | 1.15803029627167  | 22.18005585692165 |
| P  | -5.03561861394365  | -1.04730403316676 | 22.88940509620159 |
| Co | -5.21832782573017  | 1.13957899051506  | 23.25953384194493 |
| P  | -4.79975262990145  | 1.51633332220420  | 25.29038273490776 |

|   |                   |                  |                   |
|---|-------------------|------------------|-------------------|
| P | -4.42182111788117 | 3.11901320556523 | 23.10046289098945 |
| P | -2.94002547439050 | 1.65250502762346 | 23.94161238780111 |
| P | -3.64316231839807 | 3.39073742754068 | 25.16360831272642 |

**TS1**

|    |                    |                   |                   |
|----|--------------------|-------------------|-------------------|
| P  | -7.00186168830540  | 1.19723897938500  | 22.06359430853063 |
| P  | -4.92491055294872  | -1.02865997142716 | 22.80656407706498 |
| Co | -5.20298044720083  | 1.07060139536152  | 23.26704403691577 |
| P  | -4.43858170501888  | 0.11309282368215  | 24.94992156414032 |
| P  | -5.19789294406684  | 3.25692146216017  | 23.72525971517926 |
| P  | -3.33666467057855  | 2.17270830490989  | 24.20461887449729 |
| P  | -4.97467882202743  | 2.21115618718373  | 25.69374447307710 |
| C  | -6.59239795203824  | -1.71962040721751 | 22.28567787068217 |
| C  | -3.24343331348893  | -2.86321053882276 | 21.53269618857311 |
| C  | -8.92083858848484  | 2.32173796665853  | 23.94682387717200 |
| C  | -3.37759668716824  | -0.69441964001023 | 20.41368529810028 |
| C  | -9.01397486101817  | 3.06257504071196  | 21.62916716403580 |
| C  | -3.79050818877578  | -1.55915565736156 | 21.45581625344452 |
| C  | -2.48098722823226  | -1.17147454639016 | 19.45204626594927 |
| H  | -2.17543763184287  | -0.50116402949079 | 18.64941431437882 |
| C  | -8.37251593469015  | 1.47669050108623  | 25.06219169810086 |
| H  | -9.00330311754562  | 0.59475834954742  | 25.22308820327469 |
| H  | -8.33895354411169  | 2.04326419828736  | 25.99847709229448 |
| H  | -7.36624765322015  | 1.12249955748501  | 24.81809060823303 |
| C  | -1.96893005249102  | -2.46944213085408 | 19.48853413401963 |
| C  | -2.35410761674382  | -3.29529687359667 | 20.54438481607355 |
| H  | -1.94584274685814  | -4.30311022578508 | 20.61185729268794 |
| C  | -3.85935238241692  | 0.72655673805403  | 20.29853844359320 |
| H  | -3.70263064772203  | 1.27325275606466  | 21.23775037244516 |
| H  | -4.93716741319870  | 0.77519951040630  | 20.11200638232438 |
| H  | -3.33418838153586  | 1.24199834674787  | 19.48688537063887 |
| C  | -9.96341192598782  | 3.20836038602157  | 24.24409121723342 |
| H  | -10.32029978664812 | 3.26769934769985  | 25.27210091980558 |
| C  | -10.55061173840405 | 4.01368031422999  | 23.27177536625890 |
| C  | -8.53250187977769  | 3.05235267107204  | 20.19529013686724 |
| H  | -8.59619603179749  | 2.05058623574500  | 19.75967786097792 |
| H  | -7.48225914382119  | 3.35502804980224  | 20.12587225256102 |
| H  | -9.13724319865057  | 3.73989575952034  | 19.59284345206634 |
| C  | -10.05679449734530 | 3.92705226911585  | 21.96776674168657 |
| H  | -10.49043197515595 | 4.55467440053952  | 21.18968339851926 |
| C  | -3.58354361118365  | -3.80842137158150 | 22.65812434109055 |
| H  | -4.60956796788406  | -4.18021446809590 | 22.56963047408026 |
| H  | -3.51702126533134  | -3.30208721407323 | 23.62646552673098 |
| H  | -2.90675105248767  | -4.66954099674300 | 22.64772449012602 |
| C  | -1.03712727015248  | -2.96760541036385 | 18.41081800770091 |
| H  | -0.41732570616736  | -2.15637338839655 | 18.01406627710141 |
| H  | -1.60239720334723  | -3.39036424051509 | 17.56940690374788 |
| H  | -0.37638375572217  | -3.75404546791362 | 18.79055980358966 |
| C  | -11.69509692116631 | 4.93832011224642  | 23.60961584038899 |
| H  | -11.74472634558787 | 5.12811368554859  | 24.68674139321505 |
| H  | -12.65587298711794 | 4.50266034691649  | 23.30414633227634 |

|   |                    |                   |                   |
|---|--------------------|-------------------|-------------------|
| H | -11.59537923480351 | 5.90042222808099  | 23.09445692570847 |
| C | -7.75611428809123  | -0.53636690086278 | 22.09088897202185 |
| C | -8.43182239200573  | 2.23665217728232  | 22.62549449593773 |
| B | -7.27503725864129  | -3.13269041659493 | 22.98542540923672 |
| H | -6.59153340079242  | -3.75858207033386 | 23.72163704757881 |
| B | -8.45677661975074  | -3.71496404774028 | 21.80712021375967 |
| H | -8.69416231988074  | -4.87483194130980 | 21.70392113455564 |
| B | -8.39357625633709  | -2.63465416360917 | 20.39117504190367 |
| H | -8.58456423539242  | -3.00428460704773 | 19.27863684663803 |
| B | -8.90467153783999  | -1.01966307971194 | 20.92443389522928 |
| H | -9.38279633954763  | -0.17395394832238 | 20.24710374893999 |
| B | -9.69256996031177  | -2.44998806885356 | 21.60166097553418 |
| H | -10.82770063169068 | -2.69782014304652 | 21.35251811917915 |
| B | -7.76493222219733  | -1.51916823734476 | 23.50451780925538 |
| H | -7.40408156327497  | -1.04956475488864 | 24.52168210309387 |
| B | -9.25807864381060  | -1.08531031346006 | 22.65832420116034 |
| H | -9.99244157026122  | -0.30012805584322 | 23.15069955689031 |
| B | -7.18719167954397  | -1.39160971738193 | 20.71134239198286 |
| H | -6.48203409565011  | -0.82006686275906 | 19.95857234717119 |
| B | -6.90108094381047  | -3.04728873720712 | 21.25813192370984 |
| H | -5.97797844071421  | -3.62839656250286 | 20.80093907600389 |
| B | -8.98851268989563  | -2.75708415502769 | 23.21043777092506 |
| H | -9.60580464028828  | -3.20978673906586 | 24.11874056212693 |

## Int2

|    |                   |                   |                   |
|----|-------------------|-------------------|-------------------|
| P  | -6.90094035657776 | 1.32909940605445  | 22.07674592083892 |
| P  | -4.93571724301575 | -0.89432034469891 | 22.71893385973832 |
| Co | -5.25931243776362 | 1.04417303927256  | 23.56993029585357 |
| P  | -4.40537590678722 | -0.65705361870095 | 24.70031557245813 |
| P  | -5.42676024910311 | 3.33290357158298  | 23.53948320437081 |
| P  | -3.49535145059591 | 2.41508995636499  | 23.27164097109312 |
| P  | -4.42421969337018 | 2.41033013028838  | 25.22373517567775 |
| C  | -6.59423657427327 | -1.63529212974705 | 22.25412725472852 |
| C  | -3.24423853810681 | -2.84794135689175 | 21.64323261131580 |
| C  | -8.83165919906398 | 2.31551792357817  | 24.03678159702236 |
| C  | -3.40158508891564 | -0.77153456152003 | 20.35128807664958 |
| C  | -9.06955318862311 | 3.04002748212855  | 21.72475086689311 |
| C  | -3.79041891095005 | -1.55439284400776 | 21.46099994624034 |
| C  | -2.50449470091539 | -1.32111791111964 | 19.42700495116934 |
| H  | -2.21830683420649 | -0.72140644970874 | 18.56418414191122 |
| C  | -8.16171410357419 | 1.56549919158337  | 25.15683044873740 |
| H  | -8.77538062346356 | 0.71494779509295  | 25.47499385615840 |
| H  | -8.01286180957562 | 2.21978294539852  | 26.02279934135949 |
| H  | -7.18010532254124 | 1.17788293538684  | 24.85618664966890 |
| C  | -1.97368407197383 | -2.60099059019598 | 19.57396093851550 |
| C  | -2.35137798844359 | -3.34584286844722 | 20.69443873179192 |
| H  | -1.94639576016107 | -4.34728321930054 | 20.83449650087774 |
| C  | -3.87696839408953 | 0.63980140629121  | 20.13755596217664 |
| H  | -4.95589180730455 | 0.75634323765577  | 20.27799539130395 |
| H  | -3.61209187380548 | 0.97850973300658  | 19.13071565329366 |
| H  | -3.40698284687924 | 1.31448661592674  | 20.86471431955303 |



|   |                    |                   |                   |
|---|--------------------|-------------------|-------------------|
| C | -9.95896924246217  | 3.08111671922188  | 24.36284077023108 |
| H | -10.29142975964986 | 3.10305602620641  | 25.40052927724409 |
| C | -10.66113824571656 | 3.81128719212630  | 23.40850339928772 |
| C | -8.61530808240659  | 3.10684156268726  | 20.28348901544154 |
| H | -8.58254967695695  | 2.11553241680226  | 19.82294141737499 |
| H | -7.60282396200703  | 3.51739634133595  | 20.20861936670182 |
| H | -9.29778041810293  | 3.74185966901742  | 19.70706288582193 |
| C | -10.19218655758030 | 3.78356711320975  | 22.09275975177324 |
| H | -10.70938823483211 | 4.36330270403512  | 21.32867385655441 |
| C | -3.58792235810446  | -3.69530897542690 | 22.83993775102074 |
| H | -4.66641431276521  | -3.86117848931945 | 22.92045512746597 |
| H | -3.27507116549831  | -3.19802464012884 | 23.76575144437051 |
| H | -3.09354257260474  | -4.66927575884890 | 22.77100807974238 |
| C | -1.00083256468426  | -3.16220564239495 | 18.56561594513582 |
| H | 0.01690997644772   | -3.19480567735732 | 18.97576969365484 |
| H | -0.97670140585720  | -2.54999280293711 | 17.65886279158913 |
| H | -1.27000658810336  | -4.18628528589737 | 18.28239083459837 |
| C | -11.89424250150880 | 4.60002350891318  | 23.77715113757544 |
| H | -11.88805569570865 | 5.59166594051343  | 23.31009380882322 |
| H | -11.96838712478065 | 4.73099102252869  | 24.86141456363256 |
| H | -12.80464806074690 | 4.08711013811359  | 23.43982540806102 |
| C | -7.70260439668290  | -0.41453429482967 | 22.03701364199928 |
| C | -8.38037804993721  | 2.27414482080450  | 22.70099307236934 |
| B | -7.32085984991085  | -3.03437816178285 | 22.92294608654854 |
| H | -6.68247314873282  | -3.68050716463795 | 23.68159985159838 |
| B | -8.47518921326449  | -3.57879042669524 | 21.69887468310161 |
| H | -8.73724882459553  | -4.73112670901490 | 21.57579885625764 |
| B | -8.33689923143618  | -2.49011609181986 | 20.29334218840346 |
| H | -8.49896762916806  | -2.84516240187915 | 19.17185170686257 |
| B | -8.82267370572221  | -0.86225780767419 | 20.82642776550255 |
| H | -9.25722814339412  | -0.00771497383648 | 20.13315035834678 |
| B | -9.66949926161652  | -2.28081883476533 | 21.46017371081941 |
| H | -10.80047845850877 | -2.49776923517712 | 21.16809942827609 |
| B | -7.79560659067432  | -1.40794397733033 | 23.43859237036057 |
| H | -7.46049454981994  | -0.96500965922004 | 24.47224490017354 |
| B | -9.24275232582708  | -0.93409332937166 | 22.54266068291519 |
| H | -9.97610542539621  | -0.14010983353482 | 23.02046323949218 |
| B | -7.11427734642418  | -1.28168603624781 | 20.66527548953871 |
| H | -6.36832964288644  | -0.72815890222636 | 19.94152577824432 |
| B | -6.88649443230180  | -2.94983765050761 | 21.20807723015880 |
| H | -5.95487750944138  | -3.54628630479570 | 20.78922757022781 |
| B | -9.03169875116926  | -2.61598246655527 | 23.08944676148337 |
| H | -9.68913998538053  | -3.06041311657594 | 23.97281606182098 |

TS2

|    |                   |                   |                   |
|----|-------------------|-------------------|-------------------|
| P  | -7.37198614811417 | 1.56196340769492  | 21.90269449568449 |
| P  | -4.99754172062628 | -0.36336393259228 | 21.91253048303943 |
| Co | -5.18458628377703 | 1.74568948147172  | 22.19777817372321 |
| P  | -5.04457784780320 | 0.45083999178651  | 23.88077396433501 |
| P  | -5.46742772232741 | 3.83364650114991  | 21.13361018997905 |
| P  | -3.54082537392908 | 2.95396742496846  | 21.20264318033016 |

|   |                    |                   |                   |
|---|--------------------|-------------------|-------------------|
| P | -4.48020339691819  | 3.70124096305484  | 23.06212629242372 |
| C | -6.58602570277656  | -1.29255216991691 | 21.52480511005218 |
| C | -3.14369828241546  | -2.47669512992327 | 22.28117649462620 |
| C | -8.95766004210022  | 1.98821548642372  | 24.37343189552029 |
| C | -3.20090920403103  | -1.42902202014823 | 20.06857731729582 |
| C | -9.43172505939671  | 3.29763026108328  | 22.37207586346847 |
| C | -3.69277540801389  | -1.52769619726269 | 21.39065711993303 |
| C | -2.18380594619330  | -2.29543009386337 | 19.65958327984609 |
| H | -1.80868076267870  | -2.21559533437826 | 18.64030479157582 |
| C | -8.25642652168018  | 0.91900474869243  | 25.15579080269805 |
| H | -8.71261336067908  | -0.05908567197995 | 24.96970402736558 |
| H | -8.32061586598680  | 1.12378897383126  | 26.22925516422771 |
| H | -7.20295036331963  | 0.83385788486640  | 24.87058631009970 |
| C | -1.64086102515606  | -3.25338305818983 | 20.51701520036925 |
| C | -2.12970979025408  | -3.32245570655647 | 21.82263741931064 |
| H | -1.71303336689230  | -4.05717105716070 | 22.51033733924707 |
| C | -3.74427092640915  | -0.41863795832128 | 19.09130275907323 |
| H | -3.69720149756219  | 0.59474358690285  | 19.50534287783055 |
| H | -4.79755045198684  | -0.61507236688939 | 18.86549861648661 |
| H | -3.17954799881724  | -0.45455004645567 | 18.15439608246452 |
| C | -9.95825014788188  | 2.70776918383355  | 25.04069383597429 |
| H | -10.15905629583853 | 2.46723243729834  | 26.08423499770407 |
| C | -10.70091366677278 | 3.70630028054583  | 24.41936404431942 |
| C | -9.24000298115051  | 3.67256643622463  | 20.91766978033188 |
| H | -9.39782214120230  | 2.81272785448135  | 20.25936052472252 |
| H | -8.22540665698757  | 4.03321204095553  | 20.72134283711501 |
| H | -9.95085095279401  | 4.46183735468275  | 20.64674361129938 |
| C | -10.42243081376487 | 3.98048903556662  | 23.07929096418322 |
| H | -10.99639533888249 | 4.74710272705083  | 22.56006531331235 |
| C | -3.59575375841635  | -2.59796232515971 | 23.71398020148077 |
| H | -4.68406917086252  | -2.65837632613992 | 23.79313429616618 |
| H | -3.29040350401018  | -1.71966476320479 | 24.29602682714590 |
| H | -3.15763847892084  | -3.48949832154192 | 24.17430411452542 |
| C | -0.57376380855029  | -4.20704059763756 | 20.03781285025623 |
| H | 0.07515401324234   | -4.52294695328895 | 20.86121706709449 |
| H | 0.04852859092143   | -3.74854917604784 | 19.26228517293114 |
| H | -1.02367687144244  | -5.11138883136543 | 19.60701113268196 |
| C | -11.76068416512333 | 4.47714004032062  | 25.16746053459183 |
| H | -11.42503799722567 | 5.49988763781281  | 25.38317006528245 |
| H | -11.99922070750000 | 3.99526021384682  | 26.12083728468688 |
| H | -12.68353249431706 | 4.55543435742621  | 24.58096670156044 |
| C | -7.85922180953929  | -0.27233977833845 | 21.75007837972689 |
| C | -8.67024724967944  | 2.27999526545828  | 23.01850404230129 |
| B | -6.99359507651592  | -2.91388066133055 | 21.91275479960037 |
| H | -6.15171505783276  | -3.60161650084673 | 22.37926318676502 |
| B | -8.24565970283953  | -3.36651032740385 | 20.74847759813851 |
| H | -8.36357548091833  | -4.49156492155407 | 20.38525084777693 |
| B | -8.49362937509943  | -1.99033769091065 | 19.64518811126959 |
| H | -8.78585901982585  | -2.11212015049483 | 18.50076253477393 |
| B | -9.09995445778589  | -0.62789806803465 | 20.61276613416674 |
| H | -9.74810682464114  | 0.28258545662808  | 20.22235455843808 |
| B | -9.63142589041658  | -2.27014096645621 | 20.98751442242694 |

|   |                    |                   |                   |
|---|--------------------|-------------------|-------------------|
| H | -10.75562084456958 | -2.60610215065087 | 20.80154418778533 |
| B | -7.60242142376547  | -1.56501392209425 | 22.87505605648627 |
| H | -7.17583537334381  | -1.30492272274272 | 23.93820668770397 |
| B | -9.21761699558786  | -1.14127410363399 | 22.30434369939905 |
| H | -9.96979354404454  | -0.59651139418779 | 23.03684559833498 |
| B | -7.40563679203571  | -0.70430313175336 | 20.13332175521564 |
| H | -6.86882894909397  | 0.13229275292355  | 19.49920950806355 |
| B | -6.85982995524690  | -2.37674660799152 | 20.23086009097115 |
| H | -5.93195477610948  | -2.71195062513654 | 19.57729781835154 |
| B | -8.70001393236768  | -2.84771921202843 | 22.39012302769096 |
| H | -9.14140905141582  | -3.58399181336815 | 23.21081054624024 |

**[meso-8]**

|    |                   |                   |                   |
|----|-------------------|-------------------|-------------------|
| Co | 12.58826371330397 | 13.71309636424900 | 4.90881189646062  |
| C  | 12.47766017535832 | 10.56559566172488 | 3.02274762490693  |
| P  | 13.26083592171428 | 14.78953162058117 | 6.79830637820765  |
| P  | 11.36648664276162 | 13.71310827981878 | 6.80682313140730  |
| P  | 12.32156011532845 | 12.35845879109798 | 3.32576295907844  |
| P  | 13.99696444503330 | 13.71308761301178 | 2.99347275041056  |
| C  | 11.04129929357071 | 12.90120399463888 | 2.00490950981794  |
| C  | 13.30888167983590 | 10.00445270563121 | 2.03130211121613  |
| C  | 10.82069295201641 | 10.28329979890261 | 4.95215120367249  |
| H  | 10.29641720393155 | 9.46896499804751  | 5.46215242868165  |
| H  | 10.07533646602938 | 10.97522336740049 | 4.54676347532399  |
| H  | 11.39994037911820 | 10.85341050741640 | 5.68774405691143  |
| C  | 11.71096713565261 | 9.72759816500423  | 3.86830111064929  |
| C  | 11.78558739445209 | 8.34439904635271  | 3.69051831766399  |
| H  | 11.19093284666608 | 7.70338146928208  | 4.33973695450065  |
| C  | 12.59562426778194 | 7.76753915079830  | 2.71022589429168  |
| C  | 13.35085461226319 | 8.61315234999128  | 1.89714655634395  |
| H  | 13.99116832932515 | 8.18211830550961  | 1.12875294011102  |
| C  | 14.16301115944522 | 10.84695363997959 | 1.11926101294788  |
| H  | 14.59739385028415 | 10.22638658455386 | 0.32893698129335  |
| H  | 14.97849498301661 | 11.32625863424847 | 1.67214948168887  |
| H  | 13.58563074272194 | 11.65066637017536 | 0.65594253965168  |
| C  | 12.63168480473722 | 6.27079964136099  | 2.51986587639638  |
| H  | 13.51175168685671 | 5.96641198868086  | 1.94474779180073  |
| H  | 11.74240140202536 | 5.92400075518413  | 1.97741550438238  |
| H  | 12.65008628352242 | 5.74827181580033  | 3.48260261869071  |
| B  | 9.72083640705288  | 13.71306716680123 | 2.76287483655179  |
| H  | 9.70487495604162  | 13.71307418269402 | 3.94112029508956  |
| B  | 11.67209782807663 | 13.71306585518115 | 0.62761651593861  |
| H  | 12.84081126704308 | 13.71307198124589 | 0.47492970751311  |
| B  | 10.66573260940244 | 12.27646521355432 | 0.46093708348336  |
| H  | 11.17309751608336 | 11.26005220015665 | 0.12873679441096  |
| B  | 9.46994109315006  | 12.27723722899087 | 1.76957278348226  |
| H  | 9.18410731476442  | 11.25931344196467 | 2.30153528936752  |
| B  | 10.38000778354366 | 13.71304953260939 | -0.55497762742382 |
| H  | 10.63631826115000 | 13.71304357598719 | -1.71465845488106 |
| B  | 9.00526679545605  | 12.82166412981826 | 0.14380776014993  |
| H  | 8.26864021775199  | 12.17953977278252 | -0.53167093555432 |

|   |                   |                   |                   |
|---|-------------------|-------------------|-------------------|
| B | 8.43259443584143  | 13.71305382118134 | 1.57628491745911  |
| H | 7.30040807623639  | 13.71305036573581 | 1.93338085228922  |
| C | 12.47760954615149 | 16.86056621736942 | 3.02268979953798  |
| P | 12.32155007948784 | 15.06770860858748 | 3.32574416031617  |
| C | 11.04129051932720 | 14.52493442417036 | 2.00490089693160  |
| C | 13.30835479359108 | 17.42169019538257 | 2.03083640524351  |
| C | 10.82172824589715 | 17.14288278241138 | 4.95301265688304  |
| H | 10.29777378975743 | 17.95722337746666 | 5.46333391223276  |
| H | 10.07611420027151 | 16.45099764062725 | 4.54803286538303  |
| H | 11.40137521030179 | 16.57273248278973 | 5.68825882236629  |
| C | 11.71140546660775 | 17.69857822123841 | 3.86866870982462  |
| C | 11.78601611803576 | 19.08177786001797 | 3.69089955984392  |
| H | 11.19174946501973 | 19.72280849891507 | 4.34045971741417  |
| C | 12.59558559905161 | 19.65862411614123 | 2.71021217962106  |
| C | 13.35034764406193 | 18.81299309191785 | 1.89671339863319  |
| H | 13.99028106670696 | 19.24401594851230 | 1.12799580429131  |
| C | 14.16190107801386 | 16.57916572425562 | 1.11827234339202  |
| H | 14.59591239850144 | 17.19974248529788 | 0.32775215753298  |
| H | 14.97764024731160 | 16.09974395227160 | 1.67068309579112  |
| H | 13.58418754710690 | 15.77553996468169 | 0.65521733896832  |
| C | 12.63163872469625 | 21.15536893575680 | 2.51988626698279  |
| H | 13.51143326395137 | 21.45972515966802 | 1.94433455978341  |
| H | 11.74210171127682 | 21.50223972184585 | 1.97789731040973  |
| H | 12.65055713819755 | 21.67786147956809 | 3.48263232679859  |
| B | 10.66571819473906 | 15.14965242692154 | 0.46091982380304  |
| H | 11.17307601331353 | 16.16606771603491 | 0.12870808879387  |
| B | 9.46992509734900  | 15.14888211026854 | 1.76955444744591  |
| H | 9.18407955633266  | 16.16680874119368 | 2.30150193106488  |
| B | 9.00525680952714  | 14.60443046860127 | 0.14379652461732  |
| H | 8.26862378316406  | 15.24653839973930 | -0.53169095556861 |
| P | 13.26084364390272 | 12.63669916020167 | 6.79832492727804  |

**rac-2**

|   |                   |                   |                  |
|---|-------------------|-------------------|------------------|
| N | -1.67536377025352 | 3.09456163214610  | 3.18373766090765 |
| B | 0.22424535670723  | -3.41517154089041 | 3.40533369884735 |
| H | 1.02393223861685  | -2.66087467856648 | 2.98652037354733 |
| C | -1.87833146305021 | 2.09560582959981  | 0.95924104458296 |
| B | -2.49498013043711 | -4.27263251036002 | 3.19509698212553 |
| H | -3.49357333869868 | -4.11863964094296 | 2.58200012237029 |
| C | -2.50210922711123 | 2.61458637349541  | 2.10387378034432 |
| B | -1.46196991664944 | -5.71676531369921 | 3.28045753771912 |
| H | -1.76226372319543 | -6.71384577863348 | 2.71280671271325 |
| C | -3.93804098579597 | -0.02023178044492 | 4.80570585235403 |
| H | -3.13208473034237 | 0.71352031305876  | 4.64876407833380 |
| H | -3.53579123927725 | -0.77612503277234 | 5.48627741502496 |
| H | -4.77365742388549 | 0.48122974970376  | 5.30356877815660 |
| B | 0.23092881204465  | -5.17313356053911 | 3.41129389424510 |
| H | 1.14800175730909  | -5.76027343442763 | 2.94248607560627 |
| C | -6.27646776157317 | -1.10926041704986 | 2.02713712054700 |
| B | -0.91878780656017 | -4.29054308600149 | 2.38512655843061 |
| H | -0.83329905048518 | -4.13389868364498 | 1.21540594285382 |

|    |                   |                   |                   |
|----|-------------------|-------------------|-------------------|
| C  | -3.8941617000099  | 2.64955421271777  | 2.24921552630129  |
| C  | -4.38160251746800 | -0.61210085903527 | 3.49559889064126  |
| C  | -3.48506558166641 | -1.13211411169368 | 2.53572922717456  |
| C  | -1.42829991383259 | 4.42888537250254  | 3.49353847368008  |
| H  | -1.85687779123513 | 5.23614754202089  | 2.92208043242705  |
| C  | -1.42362367425465 | -2.95837738982479 | 3.33518737046242  |
| C  | -4.54681334839233 | 3.20500171554718  | 3.48933463795887  |
| H  | -4.62439060238763 | 4.29840973512565  | 3.44206064827804  |
| H  | -3.97677675299198 | 2.95686291927912  | 4.38845947387540  |
| H  | -5.55687583052827 | 2.80179582805287  | 3.59576359758950  |
| C  | -5.37713025294557 | -1.59372838707382 | 1.07736987943880  |
| H  | -5.75158345243260 | -1.96690124498834 | 0.12548663280295  |
| C  | -2.69878186834822 | 1.60847279919800  | -0.05833518185323 |
| H  | -2.23259015743464 | 1.19713352832507  | -0.95097926838519 |
| C  | -0.37877520755449 | 2.03464958501245  | 0.83610227068000  |
| H  | -0.08926729268568 | 1.85238187700441  | -0.20185114504129 |
| H  | 0.01565752868047  | 1.21777239226957  | 1.45095011020672  |
| H  | 0.09366745108676  | 2.96236637727498  | 1.17512732338210  |
| C  | -3.10115246827234 | -2.13615649159935 | 0.21247678631574  |
| H  | -3.66099326991660 | -2.24997136687334 | -0.72106891554782 |
| H  | -2.68963713285092 | -3.11537712762943 | 0.47780351721646  |
| H  | -2.24900882324645 | -1.46913677279647 | 0.04042436586048  |
| C  | -4.09335467655906 | 1.62570820265925  | 0.04310034743459  |
| C  | -5.75372422666831 | -0.61612236437738 | 3.22154180266215  |
| H  | -6.43334151602238 | -0.21438458846413 | 3.97150568371279  |
| C  | -4.67012681516842 | 2.14492169343797  | 1.20250361349733  |
| H  | -5.75188923693196 | 2.13909023451729  | 1.30944599690818  |
| C  | -3.99971597260692 | -1.60460431237016 | 1.30150175192526  |
| C  | -7.76197497225406 | -1.11846160366068 | 1.76709361332274  |
| H  | -7.99343993672170 | -0.73668209388456 | 0.76618011315946  |
| H  | -8.29591846496929 | -0.50752942144984 | 2.50090451254742  |
| H  | -8.16253561260081 | -2.13800377282069 | 1.82499238992644  |
| C  | -4.95053058261013 | 1.11063309021800  | -1.08487503105741 |
| H  | -5.00503475027011 | 1.84610163253600  | -1.89742663007670 |
| H  | -5.96866814655343 | 0.90783227838596  | -0.74331762796482 |
| H  | -4.53723318009582 | 0.18804728499718  | -1.50338139885718 |
| C  | -1.02615860973498 | 2.25188166135867  | 4.04290431311255  |
| P  | -1.63852080105673 | -1.18574705983896 | 2.68728647278746  |
| Ni | -1.03705555319133 | 0.31295880843066  | 4.05033751218000  |
| N  | -0.36869801695246 | 3.09583252601269  | 4.89448111760864  |
| C  | -0.17569047148552 | 2.11200328083364  | 7.12658074816586  |
| C  | 0.45324662893566  | 2.61727603959742  | 5.97861384803894  |
| C  | 1.84566232054979  | 2.64133781157481  | 5.83496336146886  |
| C  | -0.60206829712891 | 4.42967008696231  | 4.57221564352054  |
| H  | -0.16535564145000 | 5.23777724484504  | 5.13626754730171  |
| C  | 2.50417939492282  | 3.18362871913968  | 4.59212369701122  |
| H  | 2.59164939050716  | 4.27655201371120  | 4.63309064997165  |
| H  | 1.93269997570024  | 2.93535358651780  | 3.69396876131604  |
| H  | 3.51064664312058  | 2.77070580518309  | 4.48893145646837  |
| C  | 0.63991017552242  | 1.62644993334418  | 8.14877524362139  |
| H  | 0.16960613110637  | 1.22508666896252  | 9.04380349614048  |
| C  | -1.67582057465812 | 2.06391290845127  | 7.24861262813559  |

|   |                   |                   |                  |
|---|-------------------|-------------------|------------------|
| H | -1.96771441451100 | 1.88968337579399  | 8.28726988823233 |
| H | -2.07649631093918 | 1.24701497631866  | 6.63782211080129 |
| H | -2.14029697589194 | 2.99365480713003  | 6.90410413248767 |
| C | 2.03471281254828  | 1.63199705190321  | 8.04866857216921 |
| C | 2.61663361731543  | 2.13865721260047  | 6.88632914050050 |
| H | 3.69841063965150  | 2.12343977498703  | 6.78046320598358 |
| C | 2.88674290574822  | 1.12035244550667  | 9.18209277438503 |
| H | 2.94241314419807  | 1.86054181948072  | 9.99026249087535 |
| H | 3.90481063337789  | 0.91086563906154  | 8.84440326985312 |
| H | 2.46829328498057  | 0.20218425989580  | 9.60518630199207 |
| B | -2.31864277538629 | -3.40130566414589 | 4.72239901216697 |
| H | -3.11347518724530 | -2.63856291091647 | 5.13515832144938 |
| B | 0.39463290469401  | -4.27513459037888 | 4.93967114256459 |
| H | 1.39424982534249  | -4.12325255602048 | 5.55161461580397 |
| B | -0.64794571756774 | -5.71311402141494 | 4.86587157126345 |
| H | -0.35420440434581 | -6.70758088508230 | 5.44147816890412 |
| C | 1.86287754595969  | -0.04325437017467 | 3.29411452771480 |
| H | 1.06411461895918  | 0.69877966401258  | 3.44725566561563 |
| H | 1.45196286746809  | -0.80088369167823 | 2.62066859072368 |
| H | 2.70185259098922  | 0.44649430866779  | 2.79024289850852 |
| B | -2.33721117461227 | -5.15926515308615 | 4.73065646596788 |
| H | -3.25817298077854 | -5.73643241033642 | 5.20420304754872 |
| C | 4.19733208669728  | -1.12642053708247 | 6.07851081975578 |
| B | -1.18159921512145 | -4.27626585314230 | 5.74972375429377 |
| H | -1.26600383401833 | -4.10968000840893 | 6.91815602743064 |
| C | 2.30429865304643  | -0.62850621920273 | 4.60790835398670 |
| C | 1.40547158670829  | -1.13602086514916 | 5.57229026482069 |
| C | -0.66786473655056 | -2.95505982384553 | 4.78909870502059 |
| C | 3.29586445869829  | -1.59831453501189 | 7.03257936290819 |
| H | 3.66883783080758  | -1.96677902707521 | 7.98687725222833 |
| C | 1.01734273368925  | -2.12065865690829 | 7.90318301031067 |
| H | 1.57740953305946  | -2.23164722843035 | 8.83694542475630 |
| H | 0.59924597047442  | -3.09902198709670 | 7.64506634737701 |
| H | 0.16974162896985  | -1.44694111757755 | 8.07151026436390 |
| C | 3.67658298111710  | -0.63884741942969 | 4.88093327890261 |
| H | 4.35800719865919  | -0.24685798529027 | 4.12745890737238 |
| C | 1.91820778355993  | -1.60227194756157 | 6.80968204613886 |
| C | 5.68301829696102  | -1.14327386064609 | 6.33713403816910 |
| H | 5.91773616468261  | -0.75885289918819 | 7.33626097470258 |
| H | 6.21981033426113  | -0.53849492285827 | 5.60030316765077 |
| H | 6.07752043080815  | -2.16538611877355 | 6.28289497298084 |
| P | -0.44139287982314 | -1.17883293710257 | 5.42289919515472 |

**[rac-6]<sup>-</sup>**

|    |                   |                   |                  |
|----|-------------------|-------------------|------------------|
| Co | 12.33876684841707 | 10.65542647954990 | 4.60677292138646 |
| N  | 11.50906558707733 | 12.97545359523919 | 6.26477802147135 |
| B  | 9.65362213487000  | 8.11546720640168  | 3.14502884982046 |
| H  | 9.40674867589052  | 9.19376482889031  | 2.74129683181519 |
| P  | 10.76578367748425 | 9.53740887865064  | 5.67197933853363 |
| N  | 14.96225993783344 | 11.62516659080674 | 3.60853037595754 |
| B  | 11.53246657694070 | 6.76793832057879  | 4.80440997531794 |

|   |                   |                   |                   |
|---|-------------------|-------------------|-------------------|
| H | 12.48344202335258 | 6.98606411070080  | 5.46363163811440  |
| P | 12.47655875323851 | 9.12935755375076  | 3.02139809179355  |
| B | 9.92826323033466  | 6.47730986640812  | 5.47830290632143  |
| H | 9.82181452198494  | 6.47285658852388  | 6.65712828721625  |
| C | 14.08192167219445 | 8.18367027274181  | 3.00143851050824  |
| B | 8.76270279694865  | 7.33049052194808  | 4.45860172927380  |
| H | 7.83815648717211  | 7.89871489466454  | 4.92956853127686  |
| C | 11.29368787936130 | 7.69870890773287  | 3.38758340100672  |
| B | 8.98449883220588  | 5.57350160902571  | 4.28888817583013  |
| H | 8.13645268565020  | 4.81365256777484  | 4.63126260916564  |
| B | 10.71938620722420 | 5.22798971634966  | 4.50636723162579  |
| H | 11.13212531831774 | 4.22967388878538  | 5.00154059306219  |
| B | 8.80470746194570  | 6.59624089293609  | 2.84072284247827  |
| H | 7.84085533691787  | 6.58008031941642  | 2.14580757614392  |
| B | 11.60043124431854 | 6.03805283356177  | 3.19266400975499  |
| H | 12.65423098907035 | 5.70769729832135  | 2.76863813647190  |
| C | 8.67005398156733  | 11.31100289398616 | 4.70534972790381  |
| B | 10.41934147977303 | 6.86254253797631  | 2.16728015708154  |
| H | 10.66429067248781 | 7.12166329269506  | 1.03860525465048  |
| C | 16.58082551870005 | 6.83591372379215  | 2.74584748194605  |
| B | 10.01833845067164 | 5.29132123133228  | 2.86932909194926  |
| H | 9.92710407115758  | 4.32222167749139  | 2.18647148851398  |
| C | 15.73989653779578 | 7.00659891263617  | 1.64392406825793  |
| H | 16.04521379147689 | 6.62022853342305  | 0.67169542208652  |
| C | 14.50872523337149 | 7.65540124103010  | 1.75143513120033  |
| C | 9.09760372546864  | 10.36725187795891 | 5.67086246337363  |
| C | 13.89044450889482 | 11.25198133820676 | 4.00687466904371  |
| C | 6.99551550497455  | 10.72597257296777 | 6.86639579135947  |
| H | 6.35293312859365  | 10.49138286026414 | 7.71477319729056  |
| C | 14.93229741583417 | 8.01965858344440  | 4.12153130642312  |
| C | 8.22810398575933  | 10.07920222389210 | 6.75889697624925  |
| C | 15.76502414913463 | 11.69589467071452 | 2.40559362884506  |
| H | 16.23712178501018 | 12.68911551384903 | 2.38039656113418  |
| C | 7.41312276245309  | 11.91906495047533 | 4.84479041346527  |
| H | 7.09878185906910  | 12.63643702439697 | 4.08678600981160  |
| C | 11.86456322911488 | 12.03709635119873 | 5.60165746404581  |
| C | 17.70479848124302 | 10.63407555858604 | 1.16901828228570  |
| H | 18.24431274515455 | 11.58933554819408 | 1.07784052348493  |
| H | 18.46348761332930 | 9.84354415028663  | 1.22303422556723  |
| C | 8.57724566087897  | 9.06089212900073  | 7.81640348761444  |
| H | 8.43810106607967  | 8.04434395336778  | 7.43270916778075  |
| H | 7.93263513766396  | 9.18526787515435  | 8.69390739522403  |
| H | 9.62814933052630  | 9.13537630618613  | 8.11216947714864  |
| C | 15.72079968746295 | 11.50910901780271 | -0.12421176476710 |
| H | 15.06567068913663 | 11.34011650771556 | -0.98777830691028 |
| H | 16.18868883765486 | 12.49488074870914 | -0.26917185803216 |
| C | 16.81431301195425 | 10.43447152370653 | -0.06430889333385 |
| H | 17.41884363683127 | 10.45273272828964 | -0.98044947546581 |
| H | 16.34300913946944 | 9.44508244528822  | -0.00301832119851 |
| C | 9.44998183279897  | 13.68672570051221 | 7.36840234281397  |
| H | 9.37797894791204  | 14.54748462987568 | 6.69396231932490  |
| H | 8.93794650296307  | 12.84911696445163 | 6.88420089695912  |

|   |                   |                   |                   |
|---|-------------------|-------------------|-------------------|
| C | 17.91692764651900 | 6.14790153430175  | 2.60582896660505  |
| H | 18.61639148884578 | 6.75813098516745  | 2.01924277338426  |
| H | 17.81710642413001 | 5.18477900977375  | 2.09134687478507  |
| H | 18.37004482946620 | 5.96691016715700  | 3.58556647598877  |
| C | 16.15113951173407 | 7.34068588943231  | 3.96852995120636  |
| H | 16.78848150026871 | 7.21866207585091  | 4.84422321852509  |
| C | 13.65620034348479 | 7.74718568845471  | 0.50959361428225  |
| H | 14.25798357388138 | 7.54109617424594  | -0.38278074246070 |
| H | 13.18210419291265 | 8.72940726215786  | 0.42098236864605  |
| H | 12.84140973560710 | 7.01598246220398  | 0.54758203114069  |
| C | 10.92788679058100 | 13.30385404381177 | 7.54959999315168  |
| H | 11.47084767757416 | 14.17462195149207 | 7.94573004500607  |
| C | 6.56573390438875  | 11.65398754280654 | 5.91578768789443  |
| C | 9.48635922764450  | 11.75147326076744 | 3.51537158673810  |
| H | 8.87573968024632  | 11.71513807148510 | 2.60506797046703  |
| H | 10.38263828909396 | 11.13886795605369 | 3.37514860243500  |
| H | 9.82311178669781  | 12.78547443418935 | 3.65555804800625  |
| C | 16.86939676363305 | 10.62753075180332 | 2.45493289828408  |
| H | 16.39239635040251 | 9.65004077541606  | 2.57769212539594  |
| H | 17.49890044752601 | 10.79655678697700 | 3.33590529299392  |
| C | 14.88288282086980 | 11.51937832959658 | 1.15972672559395  |
| H | 14.12901466145282 | 12.31361580490605 | 1.13454892461432  |
| H | 14.34052044909260 | 10.57161585721412 | 1.26529287793938  |
| C | 14.64390998645782 | 8.55133204014428  | 5.50372025242112  |
| H | 14.80172271684541 | 7.76414448526787  | 6.25091218763701  |
| H | 13.62461643645834 | 8.93949313571957  | 5.59628848024488  |
| H | 15.32496338265472 | 9.37879577613307  | 5.73543944393949  |
| C | 8.92107568105597  | 12.79004838788380 | 9.67116122628375  |
| H | 8.45285756211685  | 13.01615133083508 | 10.63799395288825 |
| H | 8.38663469473864  | 11.93312260624399 | 9.24125239413961  |
| C | 8.78554305315557  | 13.98464321962586 | 8.71799145366833  |
| H | 9.25031580979099  | 14.87095201648625 | 9.17663536453989  |
| H | 7.72747329563446  | 14.22646171086316 | 8.55832254946622  |
| C | 11.07638257218874 | 12.12443615486594 | 8.52357844370163  |
| H | 12.13961312568055 | 11.89854563714290 | 8.65871071435805  |
| H | 10.62311904770930 | 11.24302971520420 | 8.05321079817234  |
| C | 5.24290668289837  | 12.36529688975211 | 6.06467259166942  |
| H | 4.93555758973993  | 12.82680054429703 | 5.12078342934942  |
| H | 5.30589380118326  | 13.16080068741057 | 6.81954414279405  |
| H | 4.45326480895252  | 11.67573940611455 | 6.38424001688608  |
| C | 10.39627799717438 | 12.41602900758133 | 9.86630433052194  |
| H | 10.48523998276958 | 11.53928613086739 | 10.51968464578197 |
| H | 10.91598702803509 | 13.24342290473997 | 10.37323768140950 |
| C | 10.31770365758776 | 7.96730585593846  | 4.71596120202979  |

**[rac-7]<sup>-</sup>**

|   |                   |                   |                  |
|---|-------------------|-------------------|------------------|
| B | 11.89211526578032 | 23.04168004961147 | 6.70751660109032 |
| H | 12.08513699540044 | 23.60821479421416 | 5.68121791929194 |
| B | 10.04832744593277 | 22.23838864530017 | 8.75904694928911 |
| H | 8.94168750794635  | 22.13328049286435 | 9.16630068376118 |
| B | 10.77652803888866 | 23.63678232336479 | 7.96319883293962 |



|   |                   |                   |                   |
|---|-------------------|-------------------|-------------------|
| H | 10.16840739197986 | 24.64986769562672 | 7.83608177136288  |
| C | 13.98521774487472 | 19.10162018434053 | 9.94827964273124  |
| B | 10.36094951705872 | 22.19173728746295 | 7.01477966614263  |
| H | 9.46386197429422  | 22.06544839679407 | 6.25433785830469  |
| B | 13.17894632622533 | 22.13641271038575 | 7.51590287325320  |
| H | 14.26528727241783 | 21.95011594602568 | 7.08790177746784  |
| B | 12.52997901234500 | 23.59363370122286 | 8.27404312650980  |
| H | 13.19111853832299 | 24.57568276636637 | 8.37909598995850  |
| B | 12.87330266782429 | 22.14884946553726 | 9.25913954087442  |
| H | 13.75557037669591 | 21.99766034981814 | 10.03162630502514 |
| B | 11.39030533194436 | 23.08839455095276 | 9.54701084156706  |
| H | 11.22665069522846 | 23.69602017078319 | 10.55454461164429 |
| B | 11.85264646035699 | 21.27846242451102 | 6.74521514586532  |
| H | 11.99953766425616 | 20.49693037773546 | 5.87550248408734  |
| B | 11.33848361644948 | 21.32902519399213 | 9.56187310784795  |
| H | 11.14689871377215 | 20.59103298408594 | 10.46049724257956 |
| C | 13.42849595814229 | 18.64489026333125 | 11.16450054136074 |
| C | 15.32353145322392 | 19.58233255437842 | 9.96091867877489  |
| C | 12.05564176467772 | 18.04231522700490 | 11.27096360742572 |
| H | 11.38675450882270 | 18.40216070547233 | 10.48663132382672 |
| H | 11.61633600078652 | 18.25281802619662 | 12.25297685589482 |
| H | 12.12125522124254 | 16.95475558889976 | 11.15094005295178 |
| C | 15.48892103016921 | 19.19402805987943 | 12.36635912652709 |
| C | 16.04354311448466 | 19.61548693535654 | 11.15703254959707 |
| H | 17.06657243963960 | 19.99086721178269 | 11.13884516620957 |
| C | 14.18395850042683 | 18.71133143712305 | 12.34319943190788 |
| H | 13.72746546003456 | 18.36964727576601 | 13.27196076734011 |
| C | 8.47993815219713  | 19.38214868943070 | 7.11116154184485  |
| C | 13.67589416156135 | 16.39842433662884 | 5.94919486487367  |
| C | 8.13229352344803  | 15.82025425325827 | 8.23359572923893  |
| H | 8.05237677481422  | 15.39020733066415 | 7.22862996229388  |
| H | 8.14582246752197  | 16.90844205244689 | 8.12870346401381  |
| H | 7.23872128549121  | 15.53565588318146 | 8.80277814806306  |
| C | 12.48885216163440 | 16.25538620239034 | 6.87051366148515  |
| C | 10.62674744785493 | 15.72754771316948 | 8.14761829558523  |
| C | 7.30808314551566  | 19.48055963139252 | 7.90182774714237  |
| C | 10.76520372448182 | 20.87595177459751 | 8.01090017128158  |
| C | 8.37143731342238  | 19.40011254910864 | 5.70362443447617  |
| C | 7.10234420684562  | 19.50603661112833 | 5.12130897213365  |
| H | 7.02623443530654  | 19.50899046393000 | 4.03451009530284  |
| C | 16.01288227961583 | 20.10589592478865 | 8.72419441753194  |
| H | 15.75399682468146 | 19.51861247654407 | 7.83904828082977  |
| H | 17.09926867616654 | 20.10171420748371 | 8.86678853643154  |
| H | 15.70311795284403 | 21.13566439150838 | 8.51556856509608  |
| C | 16.27711704083159 | 19.26594012416258 | 13.65183024400166 |
| H | 17.23376863283325 | 18.73651052681572 | 13.56286783697901 |
| H | 15.71773846526711 | 18.82070142426218 | 14.48070131498933 |
| H | 16.50576254810340 | 20.30563929180508 | 13.91873743429515 |
| C | 12.39908479931262 | 20.81627005199018 | 8.30469498853965  |
| C | 13.75451295328976 | 15.10175823251416 | 5.10731188343318  |
| H | 12.84724803263047 | 14.97802385147210 | 4.50610103755699  |
| H | 13.85610573145365 | 14.22722999989199 | 5.75941970939127  |

|    |                   |                   |                   |
|----|-------------------|-------------------|-------------------|
| H  | 14.62058266712950 | 15.14004278490809 | 4.43378464424036  |
| C  | 7.36468731272708  | 19.45097018919592 | 9.41120584866117  |
| H  | 6.36257753660870  | 19.59152417621594 | 9.83072001137652  |
| H  | 8.02101463120064  | 20.23430002417772 | 9.80159115804431  |
| H  | 7.76273043384397  | 18.49704765302140 | 9.77339417678402  |
| C  | 6.06606010639608  | 19.59582848321503 | 7.27669059375209  |
| H  | 5.17223312463128  | 19.67141143974057 | 7.89483317891139  |
| C  | 13.48253805587118 | 17.59916965988780 | 5.00555570986687  |
| H  | 14.28972818448670 | 17.63504357320113 | 4.26256655598276  |
| H  | 13.48036978721420 | 18.52961185705068 | 5.57954626725841  |
| H  | 12.52793263979233 | 17.51893675501788 | 4.47129802570732  |
| C  | 9.57393778546552  | 19.34122785862538 | 4.80072122790431  |
| H  | 9.31603920510880  | 18.87245456894726 | 3.84556500787339  |
| H  | 10.38740595543229 | 18.78188646221599 | 5.26865969734271  |
| H  | 9.94141596575936  | 20.35350738606129 | 4.59495794723474  |
| C  | 14.98160479252657 | 16.54838731406375 | 6.74659867748409  |
| H  | 15.84179802234754 | 16.58513169408527 | 6.06626985324588  |
| H  | 15.11659304448284 | 15.70105794401758 | 7.42927395134568  |
| H  | 14.96245995197078 | 17.47021128690971 | 7.33537906321225  |
| C  | 9.40453548739841  | 15.32506685401907 | 8.93931365588029  |
| C  | 5.94153137851499  | 19.60957698115513 | 5.88459671070188  |
| C  | 4.58862508119082  | 19.75305848895222 | 5.23067235931692  |
| H  | 4.23320585382471  | 20.79030594919901 | 5.28720227869727  |
| H  | 3.83871371888183  | 19.12492031596509 | 5.72480091788058  |
| H  | 4.63015115965315  | 19.47240094843310 | 4.17356058798480  |
| C  | 9.45686270196599  | 15.88968732134513 | 10.36841836746551 |
| H  | 10.35458021842553 | 15.54258529584531 | 10.89099316545635 |
| H  | 8.57870183870546  | 15.56341188748913 | 10.94050646728162 |
| H  | 9.48214193046887  | 16.98273704706748 | 10.34092613940993 |
| C  | 9.37801139910692  | 13.78057093127262 | 9.00772572267472  |
| H  | 9.34757875896815  | 13.35455531445084 | 7.99911253042692  |
| H  | 8.49412932030718  | 13.43669289227961 | 9.56087017232923  |
| H  | 10.27514373227714 | 13.40403777173250 | 9.51057592445621  |
| P  | 13.12168884928991 | 19.06697547752350 | 8.30125974116186  |
| P  | 10.07453691468608 | 19.14639060505420 | 7.98743285623324  |
| P  | 10.73047586204057 | 16.19560207716818 | 6.42743589092049  |
| P  | 12.38820220966837 | 15.62852172690360 | 8.56496130178969  |
| Co | 11.47642763486001 | 17.61712921283312 | 7.98566120348307  |

**[rac-9]<sup>2-</sup>**

|   |                   |                   |                    |
|---|-------------------|-------------------|--------------------|
| B | 7.80724610171775  | 9.46687273584529  | -9.37203525845561  |
| H | 7.53226513190863  | 8.92336938477524  | -8.35453705944089  |
| P | 7.72569945304968  | 12.20694985512129 | -7.81436744493267  |
| B | 7.36780775729339  | 8.98739526892555  | -11.01595576791872 |
| H | 6.76997502246027  | 7.97860829044550  | -11.21980781845716 |
| P | 10.33811701809331 | 15.43862758462311 | -7.78712451501941  |
| B | 9.08014338676488  | 8.99404340967786  | -10.51506280873238 |
| H | 9.71636147875269  | 8.00223809454433  | -10.35254911977636 |
| P | 6.76111417724916  | 15.44002825858482 | -7.41004489644327  |
| B | 8.61766116922469  | 9.60696361195681  | -12.12200134915054 |
| H | 8.93066001217961  | 9.04464896319612  | -13.12309077351508 |

|   |                   |                   |                    |
|---|-------------------|-------------------|--------------------|
| P | 7.32398093700804  | 15.43985541071001 | -9.48411257875924  |
| B | 6.57805708567361  | 10.38566421572820 | -10.25440108108187 |
| H | 5.46965436554922  | 10.43453278468655 | -9.84622118373804  |
| B | 9.31980889403100  | 10.38057519396513 | -9.45732648974825  |
| H | 10.05392748569658 | 10.48938219551353 | -8.54393906638799  |
| B | 7.07088365467014  | 10.46972599174190 | -11.96094904395728 |
| H | 6.26329196380550  | 10.53847351750950 | -12.83101503084264 |
| B | 9.82401062366829  | 10.47901714635319 | -11.14463731270875 |
| H | 10.97437336738733 | 10.62198134048385 | -11.37916566535907 |
| B | 8.59067394319054  | 11.37289656066632 | -12.03886158153875 |
| H | 8.89253983366598  | 12.15325581051471 | -12.87553265038131 |
| C | 6.00715267907241  | 11.11230494253286 | -5.94632852180275  |
| B | 7.34315627036623  | 11.85134939050055 | -10.89284528179881 |
| H | 6.84180859705539  | 12.91667620710455 | -10.91313586596575 |
| C | 8.97920956662915  | 11.77186196958069 | -10.40798523724966 |
| C | 4.80279409798418  | 12.29106435572816 | -7.70339547401633  |
| C | 4.79120266765269  | 10.84478986758572 | -5.31588029512870  |
| H | 4.79705616989856  | 10.27849885741185 | -4.38436894105604  |
| C | 12.10791180388214 | 12.57980448425868 | -8.54084320319191  |
| C | 11.47396775430653 | 12.98963257858328 | -9.73777337098905  |
| C | 7.27534876810647  | 10.60872134600894 | -5.29222486354469  |
| H | 7.84239445707557  | 9.95929760654137  | -5.96646722680134  |
| H | 7.02798356452139  | 10.04824210454912 | -4.38217410570153  |
| H | 7.94116465843349  | 11.43681881196590 | -5.02722054263067  |
| C | 3.60543277191242  | 12.00566046898313 | -7.03333928817864  |
| H | 2.67079714638125  | 12.36739460844828 | -7.46238734939652  |
| C | 4.71711157672335  | 13.06554495739174 | -8.98914358246886  |
| H | 5.69600483778099  | 13.44020439185901 | -9.28585989740859  |
| H | 4.03967444632365  | 13.91907392008169 | -8.88060587444107  |
| H | 4.33965107426775  | 12.43055755583549 | -9.79933421487973  |
| C | 14.28638506222085 | 12.53400891570224 | -9.66097603123555  |
| C | 12.27662994361389 | 13.14679561599182 | -10.90205134704368 |
| C | 7.79995085728578  | 11.17595577116891 | -9.38279610060126  |
| C | 3.57453249580069  | 11.28644994271308 | -5.84289537003764  |
| C | 2.27397279907347  | 11.01571215191849 | -5.12509947121921  |
| H | 2.21984178127802  | 9.97753153667279  | -4.77552557421482  |
| H | 1.41693877094274  | 11.20200903190822 | -5.78065383173282  |
| H | 2.16631868886608  | 11.66207645411943 | -4.24364436358808  |
| C | 11.39577154477666 | 12.36861464418563 | -7.22908582184690  |
| H | 10.31349814553633 | 12.30863593298523 | -7.34199708599237  |
| H | 11.60380985817275 | 13.20178933078761 | -6.54623319127980  |
| H | 11.75495895049053 | 11.44580140900790 | -6.75598810614078  |
| C | 6.02789959516205  | 11.84332983508575 | -7.16462415480400  |
| C | 15.78292839654554 | 12.34219422682708 | -9.60494219707816  |
| H | 16.15959884495631 | 11.86796624361309 | -10.51905387572862 |
| H | 16.06915102776765 | 11.71863038402940 | -8.75076269923753  |
| H | 16.30037412200027 | 13.30576353415172 | -9.50015432272516  |
| C | 11.69108002210612 | 13.52921568875512 | -12.23971128086953 |
| H | 12.48781176413434 | 13.83071388268957 | -12.92922876648540 |
| H | 10.96438415527570 | 14.33847397964052 | -12.13857946747116 |
| H | 11.15363538972225 | 12.68379338736079 | -12.68452529417670 |
| C | 13.49201684932715 | 12.35710964888229 | -8.53272967706895  |

|    |                   |                   |                    |
|----|-------------------|-------------------|--------------------|
| H  | 13.95760467646028 | 12.03683610043620 | -7.59991306584521  |
| C  | 13.65345062056484 | 12.92372776364042 | -10.84151515138727 |
| H  | 14.24480128417501 | 13.06362112890247 | -11.74644474067002 |
| P  | 8.83205007361173  | 15.43901412686849 | -6.29982585297593  |
| P  | 9.68379124416908  | 13.47829550065213 | -9.94828754317770  |
| Co | 8.50772119115641  | 14.16057158311703 | -8.18826568900478  |
| B  | 7.80905015950967  | 21.41100130771661 | -9.37473727469925  |
| H  | 7.53002091190160  | 21.95466096905180 | -8.35842311645023  |
| P  | 7.72539031641901  | 18.67150864872050 | -7.81626445971430  |
| B  | 7.37473981379041  | 21.88936598453774 | -11.02034978714276 |
| H  | 6.77655060565254  | 22.89744656387902 | -11.22664334497231 |
| B  | 9.08538282278692  | 21.88480416870989 | -10.51357183875280 |
| H  | 9.71991024381534  | 22.87740125981438 | -10.34928942299848 |
| B  | 8.62908366951461  | 21.27081347597342 | -12.12184481302936 |
| H  | 8.94490222364144  | 21.83313456601563 | -13.12204624204644 |
| B  | 6.58393331084706  | 20.49052418163790 | -10.26099616253943 |
| H  | 5.47417494697107  | 20.44044593788088 | -9.85666619732887  |
| B  | 9.32296008713070  | 20.49893761241542 | -9.45447323328398  |
| H  | 10.05409990474567 | 20.39137687375180 | -8.53854007351866  |
| B  | 7.08274791758233  | 20.40633966781546 | -11.96579008772844 |
| H  | 6.27823449501107  | 20.33633878955643 | -12.83860369443384 |
| B  | 9.83303815265077  | 20.40044763030746 | -11.14002517449139 |
| H  | 10.98434640922723 | 20.25870434925784 | -11.37058468648048 |
| B  | 8.60381395512948  | 19.50486441747448 | -12.03809260844888 |
| H  | 8.90946842135004  | 18.72450586638780 | -12.87341568900168 |
| C  | 6.00223653777666  | 19.76758301659880 | -5.95332340744322  |
| B  | 7.35291266109581  | 19.02546099257328 | -10.89617113284308 |
| H  | 6.85274565675019  | 17.95959561144097 | -10.91779894961434 |
| C  | 8.98716870768820  | 19.10688904796984 | -10.40575533182753 |
| C  | 4.80218517144265  | 18.58793725652192 | -7.71272829415890  |
| C  | 4.78468157693563  | 20.03598786125153 | -5.32636004122200  |
| H  | 4.78819261947263  | 20.60312761642535 | -4.39535528055566  |
| C  | 12.10741863563655 | 18.30548654590180 | -8.52325649228853  |
| C  | 11.48042843018148 | 17.89382672322147 | -9.72324466151222  |
| C  | 7.26880515957569  | 20.27161722414209 | -5.29643181184888  |
| H  | 7.83714147307630  | 20.92112911414617 | -5.96952829172967  |
| H  | 7.01917043636258  | 20.83226164101901 | -4.38709768104280  |
| H  | 7.93428184622686  | 19.44381520219842 | -5.02972586576553  |
| C  | 3.60306581152384  | 18.87463047664556 | -7.04636546165935  |
| H  | 2.66939671199392  | 18.51339864709017 | -7.47794474883983  |
| C  | 4.71965708137249  | 17.81254563712113 | -8.99815195549320  |
| H  | 5.70035911456536  | 17.44344064440120 | -9.29571304178198  |
| H  | 4.04752381141891  | 16.95496297655837 | -8.88849144739607  |
| H  | 4.33741954337967  | 18.44491149848954 | -9.80815937784932  |
| C  | 14.29053501355423 | 18.36228262284145 | -9.63394366203741  |
| C  | 12.28927040953837 | 17.73912954742145 | -10.88354760731561 |
| C  | 7.80374007631706  | 19.70204135708955 | -9.38478905330416  |
| C  | 3.56923431898653  | 19.59469060367621 | -5.85652821460493  |
| C  | 2.26682591851192  | 19.86657588601293 | -5.14252287234458  |
| H  | 2.21303186930650  | 20.90451839490821 | -4.79221683564351  |
| H  | 1.41155481955226  | 19.68198478492823 | -5.80086194788599  |
| H  | 2.15557572584490  | 19.21958809693618 | -4.26196648865128  |

|    |                   |                   |                    |
|----|-------------------|-------------------|--------------------|
| C  | 11.38903782275703 | 18.51099553337200 | -7.21409217418700  |
| H  | 10.30743133871254 | 18.57348284240695 | -7.33198028163321  |
| H  | 11.59185088156658 | 17.67361105211832 | -6.53479927638860  |
| H  | 11.74757957119830 | 19.43047343495763 | -6.73411294236799  |
| C  | 6.02600407505131  | 19.03533594175198 | -7.17085190362739  |
| C  | 15.78585570795989 | 18.56152180145618 | -9.57137198182246  |
| H  | 16.16440164046832 | 19.03572812550993 | -10.48470941282686 |
| H  | 16.06509831771113 | 19.18819584803147 | -8.71715090644448  |
| H  | 16.30759743715796 | 17.60074374414107 | -9.46221252306747  |
| C  | 11.71181239701123 | 17.35145335549124 | -12.22319757539189 |
| H  | 12.51402046013217 | 17.05961523364462 | -12.91057313372015 |
| H  | 10.99459213268608 | 16.53356440972415 | -12.12480030710747 |
| H  | 11.16577939417372 | 18.19071744515569 | -12.66906329022669 |
| C  | 13.49044144866009 | 18.53472586530336 | -8.50907765674772  |
| H  | 13.95049490195356 | 18.85622802438128 | -7.57394009525842  |
| C  | 13.66475666464750 | 17.96871234964644 | -10.81700010709952 |
| H  | 14.26085975474052 | 17.83059274579042 | -11.71907737292075 |
| P  | 9.69228592887107  | 17.40096404027343 | -9.94366374717318  |
| Co | 8.50866869217052  | 16.71801510607506 | -8.18818574163254  |

## References

- 1 W. L. F. Armarego and C. L. L. Chai, *Purification of Laboratory Chemicals*, Butterworth-Heinemann, Oxford, 6th edn., 2009.
- 2 G. Becker, G. Gresser and W. Uhl, *Z. Naturforsch. B*, 1981, **36**, 16–19.
- 3 K. Jonas, R. Mynott, C. Krüger, J. C. Sekutowski and Y.-H. Tsay, *Angew. Chem. Int. Ed. Engl.*, 1976, **15**, 767–768.
- 4 H. Podall, W. E. Foster and A. P. Giraitis, *J. Org. Chem.*, 1958, **23**, 82–85.
- 5 M. R. Elsby, J. Liu, S. Zhu, L. Hu, G. Huang and S. A. Johnson, *Organometallics*, 2019, **38**, 436–450.
- 6 F. Nief and F. Mathey, *Tetrahedron*, 1991, **47**, 6673–6680.
- 7 K. Eichele, *WSolids 1 ver 1.20.20*, University of Tübingen, 2013.
- 8 G. M. Sheldrick, *Acta Crystallogr. A*, 2008, **64**, 112–122.
- 9 F. Neese, F. Wennmohs, U. Becker and C. Riplinger, *J. Chem. Phys.*, 2020, **152**, 224108.
- 10 F. Neese, *Wiley Interdiscip. Rev. Comput. Mol. Sci.*, 2012, **2**, 73–78.
- 11 R. A. Kendall and H. A. Früchtl, *Theor. Chem. Acc.*, 1997, **97**, 158–163.
- 12 F. Neese, F. Wennmohs, A. Hansen and U. Becker, *Chem. Phys.*, 2009, **356**, 98–109.
- 13 S. Grimme, J. Antony, S. Ehrlich and H. Krieg, *J. Chem. Phys.*, 2010, **132**, 154104.
- 14 S. Grimme, S. Ehrlich and L. Goerigk, *J. Comput. Chem.*, 2011, **32**, 1456–1465.
- 15 E. F. Pettersen, T. D. Goddard, C. C. Huang, G. S. Couch, D. M. Greenblatt, E. C. Meng and T. E. Ferrin, *J. Comput. Chem.*, 2004, **25**, 1605–1612.
- 16 J. Tao, J. P. Perdew, V. N. Staroverov and G. E. Scuseria, *Phys. Rev. Lett.*, 2003, **91**, 146401.
- 17 F. Weigend and R. Ahlrichs, *Phys. Chem. Chem. Phys.*, 2005, **7**, 3297–3305.
- 18 C. Riplinger, B. Sandhoefer, A. Hansen and F. Neese, *J. Chem. Phys.*, 2013, **139**, 134101.
- 19 D. G. Liakos, M. Sparta, M. K. Kesharwani, J. M. L. Martin and F. Neese, *J. Chem. Theory Comput.*, 2015, **11**, 1525–1539.
- 20 V. N. Staroverov, G. E. Scuseria, J. Tao and J. P. Perdew, *J. Chem. Phys.*, 2003, **119**, 12129–12137.
- 21 F. Jensen, *J. Chem. Theory Comput.*, 2015, **11**, 132–138.
- 22 M. Cossi, N. Rega, G. Scalmani and V. Barone, *J. Comput. Chem.*, 2003, **24**, 669–681.
- 23 J.-D. Chai and M. Head-Gordon, *J. Chem. Phys.*, 2008, **128**, 084106.
